# Supplementary material for: Fine-Scale Mapping at 9p22.2 Identifies Candidate Causal Variants That Modify Ovarian Cancer Risk in BRCA1 and BRCA2 Mutation Carriers
Source: PLoS One. 2016 Jul 27;11(7):e0158801. doi: 10.1371/journal.pone.0158801 (PMC4963094; doi:10.1371/journal.pone.0158801)
Supplement: S3 Table — (XLSX) [file pone.0158801.s004.xlsx]

## Sheet: br.txt
rs_id	position	REF	Eff	MAF	BRCA1_logHR	BRCA1_SE	BRCA1_pvalue	BRCA2_logHR	BRCA2_SE	BRCA2_pvalue	p-het
c9_pos16896889	16906889	T	C	0.197	-0.29	0.04	1.59e-12	-0.37	0.08	1.04e-06	0.37
rs62543581	16906006	C	A	0.1955	-0.28	0.04	2.32e-12	-0.37	0.08	1.14e-06	0.31
rs139327399	16906238	AC	A	0.196	-0.28	0.04	2.43e-12	-0.37	0.08	1.17e-06	0.31
c9_pos16895922	16905922	C	T	0.1965	-0.28	0.04	2.55e-12	-0.37	0.08	1.18e-06	0.31
rs80039758	16908383	C	G	0.199	-0.27	0.04	1.15e-11	-0.37	0.08	1.19e-06	0.26
c9_pos16896307	16906307	A	G	0.197	-0.28	0.04	2.3e-12	-0.37	0.08	1.2e-06	0.31
c9_pos16896152	16906152	A	G	0.1965	-0.28	0.04	2.47e-12	-0.37	0.08	1.22e-06	0.31
c9_pos16896094	16906094	C	T	0.1965	-0.28	0.04	2.52e-12	-0.37	0.08	1.22e-06	0.31
rs62543579	16905170	T	C	0.1955	-0.28	0.04	2.86e-12	-0.37	0.08	1.22e-06	0.31
rs12376998	16909002	A	T	0.1985	-0.27	0.04	1.38e-11	-0.37	0.08	1.33e-06	0.26
rs72713890	16906510	G	C	0.196	-0.28	0.04	2.19e-12	-0.37	0.08	1.39e-06	0.31
rs10810670	16912663	C	T	0.2	-0.26	0.04	6.56e-11	-0.36	0.08	1.55e-06	0.26
rs12377389	16913557	C	T	0.198	-0.27	0.04	3.65e-11	-0.37	0.08	1.57e-06	0.26
rs10810669	16912661	C	T	0.203	-0.26	0.04	5.93e-11	-0.36	0.08	1.57e-06	0.26
rs10962666	16892272	G	A	0.198	-0.26	0.04	1.09e-10	-0.36	0.08	1.63e-06	0.26
rs10810666	16911666	C	T	0.199	-0.27	0.04	2.73e-11	-0.36	0.08	1.66e-06	0.31
rs10810665	16911400	G	A	0.198	-0.27	0.04	2.79e-11	-0.36	0.08	1.66e-06	0.31
rs12377421	16913768	G	A	0.1985	-0.27	0.04	3.17e-11	-0.36	0.08	1.78e-06	0.31
rs34606230	16903362	A	T	0.1955	-0.29	0.04	2.74e-12	-0.37	0.08	1.96e-06	0.37
c9_pos16900214	16910214	A	C	0.2	-0.27	0.04	2.21e-11	-0.36	0.08	2.01e-06	0.31
rs10810668	16912435	G	C	0.2	-0.27	0.04	5.04e-11	-0.36	0.08	2.04e-06	0.31
c9_pos16894635	16904635	C	G	0.1975	-0.28	0.04	5.12e-12	-0.36	0.08	2.15e-06	0.37
rs62543618	16914578	C	T	0.1985	-0.27	0.04	2.87e-11	-0.36	0.08	2.21e-06	0.31
rs10962670	16896588	C	T	0.196	-0.28	0.04	3.77e-12	-0.36	0.08	2.27e-06	0.37
rs181552334	16907646	A	G	0.325	-0.26	0.03	1.11e-13	-0.31	0.06	2.31e-06	0.46
rs113780397	16907584	G	A	0.325	-0.26	0.03	1.1e-13	-0.31	0.06	2.32e-06	0.46
c9_pos16889285	16899285	T	C	0.2	-0.28	0.04	7.7e-12	-0.36	0.08	2.38e-06	0.37
rs62543619	16914716	G	A	0.1995	-0.27	0.04	2.78e-11	-0.36	0.08	2.46e-06	0.31
rs10962691	16915105	C	G	0.2005	-0.27	0.04	2.63e-11	-0.36	0.07	2.48e-06	0.26
rs34987069	16912842	CT	C	0.295	-0.23	0.04	1.57e-10	-0.32	0.07	2.54e-06	0.26
9	16909474	G	A	0.2	-0.27	0.04	1.98e-11	-0.36	0.08	2.69e-06	0.31
9	16909475	T	TG	0.2	-0.27	0.04	1.99e-11	-0.36	0.08	2.69e-06	0.31
9	16909473	T	TAC	0.2	-0.27	0.04	1.99e-11	-0.36	0.08	2.69e-06	0.31
rs199782476	16909476	A	AGCT	0.2	-0.27	0.04	1.99e-11	-0.36	0.08	2.69e-06	0.31
rs10962664	16891561	T	C	0.196	-0.28	0.04	8.31e-12	-0.36	0.08	2.73e-06	0.37
rs10962665	16891590	A	G	0.1955	-0.28	0.04	8.37e-12	-0.36	0.08	2.73e-06	0.37
rs10962692	16915874	G	C	0.196	-0.28	0.04	3.99e-11	-0.37	0.08	2.75e-06	0.31
rs200306057	16892783	T	TTTTA	0.3015	-0.28	0.04	7.45e-11	-0.37	0.08	2.97e-06	0.31
rs55689948	16908169	A	G	0.331	-0.25	0.03	1.35e-13	-0.29	0.06	4.69e-06	0.55
rs112442786	16908402	CTGGGAGGAAG	C	0.331	-0.25	0.03	1.43e-13	-0.29	0.06	4.81e-06	0.55
rs10962643	16857403	C	A	0.318	-0.26	0.03	3.2e-14	-0.3	0.06	4.95e-06	0.55
rs7866677	16909051	T	C	0.331	-0.25	0.03	1.71e-13	-0.29	0.06	4.98e-06	0.55
rs10962684	16909333	G	A	0.331	-0.25	0.03	1.91e-13	-0.29	0.06	5.31e-06	0.55
rs4465052	16913043	A	G	0.3325	-0.25	0.03	6.75e-13	-0.29	0.06	5.33e-06	0.55
rs4246134	16912988	C	T	0.3325	-0.25	0.03	6.91e-13	-0.29	0.06	5.38e-06	0.55
rs10738467	16910677	C	T	0.3295	-0.25	0.03	3.08e-13	-0.29	0.06	5.93e-06	0.55
rs34131140	16913829	A	AT	0.3295	-0.25	0.03	7.29e-13	-0.29	0.06	6.03e-06	0.55
rs35884621	16911411	T	TA	0.33	-0.25	0.03	2.24e-13	-0.29	0.06	6.2e-06	0.55
rs10810671	16914835	A	C	0.34	-0.25	0.03	5.69e-13	-0.29	0.06	6.21e-06	0.55
rs10962679	16905441	C	T	0.2585	-0.22	0.04	3.37e-09	-0.31	0.07	6.28e-06	0.26
rs35353585	16913171	T	TTTG	0.3315	-0.25	0.03	6.94e-13	-0.29	0.06	6.41e-06	0.55
rs6475093	16913514	G	C	0.3315	-0.25	0.03	6.39e-13	-0.29	0.06	6.43e-06	0.55
rs6475092	16913473	G	A	0.3315	-0.25	0.03	6.4e-13	-0.29	0.06	6.46e-06	0.55
rs6475094	16913616	G	A	0.3315	-0.25	0.03	6.23e-13	-0.29	0.06	6.47e-06	0.55
rs4631563	16913286	C	A	0.3305	-0.25	0.03	7.19e-13	-0.29	0.06	6.51e-06	0.55
rs7048397	16914703	T	C	0.3315	-0.25	0.03	5.92e-13	-0.29	0.06	6.55e-06	0.55
rs3814113	16915021	T	C	0.3305	-0.25	0.03	5.15e-13	-0.29	0.06	6.7e-06	0.55
rs7032221	16914895	A	G	0.3305	-0.25	0.03	5.77e-13	-0.29	0.06	6.71e-06	0.55
rs7045767	16910898	G	C	0.33	-0.25	0.03	1.65e-13	-0.29	0.06	6.8e-06	0.55
rs10738468	16910763	A	G	0.33	-0.25	0.03	3.8e-13	-0.29	0.06	7.56e-06	0.55
rs4445329	16911757	G	A	0.33	-0.25	0.03	4.18e-13	-0.29	0.06	7.6e-06	0.55
rs4366169	16911638	A	C	0.33	-0.25	0.03	2.6e-13	-0.28	0.06	8.56e-06	0.65
rs201753327	16906414	T	TA	0.253	-0.22	0.04	3.22e-09	-0.31	0.07	9.08e-06	0.26
rs10810647	16853779	T	C	0.249	-0.3	0.04	4.35e-16	-0.31	0.07	1.11e-05	0.9
rs4961501	16851678	G	T	0.247	-0.31	0.04	3.78e-16	-0.31	0.07	1.27e-05	1
rs7046326	16847520	G	A	0.249	-0.3	0.04	2.92e-16	-0.31	0.07	1.33e-05	0.9
rs7868157	16851977	A	C	0.244	-0.3	0.04	6.45e-16	-0.3	0.07	1.5e-05	1
rs10756823	16878616	C	A	0.2415	-0.3	0.04	1.01e-15	-0.31	0.07	1.82e-05	0.9
rs10962662	16889937	C	A	0.239	-0.31	0.04	5.7e-16	-0.3	0.07	2.06e-05	0.9
rs10124837	16891647	T	C	0.2405	-0.31	0.04	1.99e-16	-0.3	0.07	2.38e-05	0.9
rs10756819	16858084	A	G	0.3415	-0.22	0.03	3.24e-11	-0.27	0.06	2.66e-05	0.46
rs10962693	16916693	C	T	0.311	-0.26	0.04	6.23e-13	-0.29	0.07	2.68e-05	0.71
rs12379687	16854367	G	T	0.1575	-0.25	0.04	2.46e-08	-0.34	0.08	3.57e-05	0.31
rs62541877	16852453	G	A	0.1555	-0.25	0.04	2.04e-08	-0.34	0.08	3.84e-05	0.31
rs10962656	16877788	G	A	0.1505	-0.27	0.04	1.2e-09	-0.35	0.08	4.42e-05	0.37
rs60043391	16856277	A	T	0.269	0.29	0.05	2.93e-08	0.39	0.1	5.25e-05	0.37
rs12376099	16889023	G	A	0.1495	-0.28	0.04	9.05e-10	-0.34	0.08	5.59e-05	0.5
rs62541923	16870501	C	A	0.15	-0.27	0.04	2.24e-09	-0.34	0.08	5.95e-05	0.43
rs10962652	16874878	A	G	0.1465	-0.28	0.05	2.19e-09	-0.35	0.09	5.98e-05	0.5
rs11789875	16872323	G	A	0.1495	-0.27	0.04	1.52e-09	-0.34	0.08	6.15e-05	0.43
rs10962658	16881346	G	A	0.1505	-0.28	0.04	9.36e-10	-0.34	0.08	6.49e-05	0.5
rs62541922	16870182	T	C	0.15	-0.27	0.04	2.64e-09	-0.34	0.08	6.55e-05	0.43
rs140047332	16877723	GC	G	0.1495	-0.28	0.04	1.06e-09	-0.34	0.08	6.56e-05	0.5
rs62541926	16877423	T	C	0.1495	-0.28	0.04	1.05e-09	-0.34	0.08	6.72e-05	0.5
rs200648906	16871360	C	CG	0.151	-0.27	0.04	2.41e-09	-0.34	0.08	6.93e-05	0.43
rs10962653	16876736	T	C	0.1495	-0.28	0.04	1.02e-09	-0.34	0.08	7.14e-05	0.5
rs12379183	16865699	A	G	0.232	-0.2	0.04	2.07e-07	-0.28	0.07	7.16e-05	0.32
rs11788047	16858569	G	A	0.156	-0.25	0.04	1.61e-08	-0.33	0.08	7.19e-05	0.37
rs10690336	16853296	TAGTC	T	0.158	-0.24	0.04	4.75e-08	-0.33	0.08	7.53e-05	0.31
rs10962659	16883318	G	C	0.1495	-0.28	0.04	7.98e-10	-0.34	0.08	7.68e-05	0.5
rs62541927	16888222	C	G	0.1495	-0.28	0.04	1.14e-09	-0.34	0.08	7.99e-05	0.5
rs10962642	16857292	G	T	0.1585	-0.26	0.04	6.74e-09	-0.33	0.08	8.64e-05	0.43
rs10962649	16873535	C	T	0.1505	-0.28	0.04	8.98e-10	-0.33	0.08	8.99e-05	0.58
c9_pos16875464	16885464	A	G	0.151	-0.28	0.04	9.54e-10	-0.33	0.08	9.17e-05	0.58
rs62541878	16861205	A	T	0.157	-0.25	0.04	2.13e-08	-0.32	0.08	9.67e-05	0.43
rs62541879	16861508	A	G	0.157	-0.25	0.04	2.14e-08	-0.32	0.08	9.78e-05	0.43
rs10962648	16868958	G	C	0.158	-0.25	0.04	2.48e-08	-0.32	0.08	9.97e-05	0.43
rs10962647	16868380	T	G	0.17	-0.24	0.04	2.86e-08	-0.32	0.08	0.000105	0.37
c9_pos16855291	16865291	G	A	0.1575	-0.24	0.04	3.91e-08	-0.32	0.08	0.000112	0.37
rs200868580	16862913	A	ATT	0.158	-0.24	0.04	3.43e-08	-0.32	0.08	0.000125	0.37
rs10962638	16846111	G	A	0.152	-0.26	0.04	1.33e-08	-0.33	0.08	0.000136	0.43
rs10962645	16863543	A	C	0.157	-0.25	0.04	1.8e-08	-0.31	0.08	0.000148	0.5
rs13300853	16901228	C	T	0.387	-0.15	0.03	7.72e-06	-0.23	0.06	0.000157	0.23
rs1339552	16848790	C	T	0.4265	-0.2	0.03	1.06e-09	-0.23	0.06	0.000166	0.65
rs9697099	16907621	A	T	0.334	-0.2	0.04	7.8e-08	-0.26	0.07	0.000166	0.46
rs7861573	16862280	G	A	0.227	-0.2	0.04	2.54e-07	-0.27	0.07	0.000166	0.39
rs11792249	16864076	A	G	0.162	-0.25	0.04	1.86e-08	-0.31	0.08	0.000169	0.5
rs62543565	16901067	A	C	0.387	-0.14	0.03	1.18e-05	-0.23	0.06	0.000177	0.18
rs1416742	16856883	A	G	0.431	-0.19	0.03	4.24e-09	-0.22	0.06	0.000204	0.65
c9_pos16853364	16863364	C	T	0.428	-0.19	0.03	3.82e-09	-0.22	0.06	0.000215	0.65
rs2153271	16864521	T	C	0.431	-0.19	0.03	2.36e-09	-0.22	0.06	0.000234	0.65
rs7851204	16909110	A	G	0.424	-0.18	0.03	1.8e-08	-0.22	0.06	0.000238	0.55
rs139555631	16890684	C	CTATT	0.2765	-0.31	0.04	9.74e-16	-0.26	0.07	0.00024	0.54
rs10810652	16876283	A	G	0.427	-0.19	0.03	2.84e-09	-0.22	0.06	0.000278	0.65
rs10810655	16877138	C	G	0.4265	-0.19	0.03	1.96e-09	-0.22	0.06	0.00028	0.65
rs10465044	16911665	C	A	0.42	-0.18	0.03	3.13e-08	-0.22	0.06	0.000287	0.55
rs10122763	16878493	A	G	0.4265	-0.19	0.03	2.92e-09	-0.22	0.06	0.000291	0.65
rs10810650	16873551	T	C	0.4285	-0.2	0.03	1.59e-09	-0.22	0.06	0.000329	0.77
rs7040151	16881373	T	C	0.4275	-0.19	0.03	4.32e-09	-0.22	0.06	0.000333	0.65
rs12345776	16881877	A	C	0.427	-0.19	0.03	5.36e-09	-0.22	0.06	0.000339	0.65
rs12378712	16876803	A	G	0.495	-0.19	0.03	8.1e-08	-0.24	0.07	0.000344	0.51
rs377231749	16876805	C	T	0.495	-0.19	0.03	8.11e-08	-0.24	0.07	0.000344	0.51
rs1339548	16846323	T	C	0.35	-0.2	0.03	3.34e-09	-0.23	0.06	0.000363	0.65
rs370023926	16876810	G	A	0.495	-0.19	0.03	8.44e-08	-0.24	0.07	0.000366	0.51
rs4644350	16882916	G	C	0.417	-0.18	0.03	2.71e-08	-0.22	0.06	0.000375	0.55
rs10962650	16874612	T	C	0.431	-0.19	0.03	2.35e-09	-0.21	0.06	0.000384	0.77
rs35194519	16898793	A	AT	0.4275	-0.19	0.03	4.05e-09	-0.21	0.06	0.000403	0.77
rs12346199	16876784	A	G	0.4545	-0.2	0.03	6.61e-09	-0.22	0.06	0.000406	0.77
rs10962668	16894140	C	T	0.4265	-0.2	0.03	1.76e-09	-0.21	0.06	0.000413	0.88
rs149066576	16894635	A	AAAATAAAT	0.322	-0.23	0.04	1.11e-10	-0.24	0.07	0.000415	0.9
rs28498684	16900695	G	A	0.427	-0.19	0.03	5.62e-09	-0.21	0.06	0.000415	0.77
rs12551733	16895578	C	G	0.2935	-0.16	0.03	3.52e-06	-0.23	0.07	0.000424	0.36
rs10962672	16898119	A	G	0.428	-0.19	0.03	4.74e-09	-0.21	0.06	0.000426	0.77
rs10810657	16884586	A	T	0.421	-0.18	0.03	1.2e-08	-0.21	0.06	0.000431	0.65
rs7025549	16881256	G	T	0.39	-0.2	0.03	1.9e-09	-0.22	0.06	0.000448	0.77
rs1339547	16846260	A	T	0.3505	-0.2	0.03	3.34e-09	-0.22	0.06	0.000464	0.77
rs369593216	16876794	C	T	0.471	-0.19	0.03	1.83e-08	-0.22	0.06	0.00047	0.65
rs374259375	16876795	C	T	0.471	-0.19	0.03	1.83e-08	-0.22	0.06	0.000471	0.65
rs10738466	16903366	A	G	0.4275	-0.19	0.03	3.72e-09	-0.21	0.06	0.000489	0.77
rs36116821	16900765	T	C	0.427	-0.19	0.03	5.79e-09	-0.21	0.06	0.000523	0.77
rs151195704	16858725	TC	T	0.4265	0.14	0.04	6.79e-05	0.24	0.07	0.00053	0.21
rs184910623	16977882	C	G	0.0415	0.16	0.08	0.0631	0.57	0.16	0.000538	0.02
rs3927680	16887366	A	T	0.4265	-0.19	0.03	3.65e-09	-0.21	0.06	0.000551	0.77
rs4961503	16902524	G	A	0.2915	-0.16	0.04	4.19e-06	-0.23	0.07	0.000596	0.39
rs11445081	16913836	A	T	0.443	-0.15	0.03	3.6e-06	-0.21	0.06	0.000612	0.37
rs10962641	16849604	G	A	0.356	-0.21	0.03	5.01e-10	-0.21	0.06	0.000716	1
rs7868583	16906359	A	G	0.353	-0.13	0.03	0.000107	-0.21	0.06	0.000795	0.23
rs10756835	16904948	C	A	0.352	-0.13	0.03	8.99e-05	-0.21	0.06	0.000803	0.23
rs7033084	16904641	T	C	0.353	-0.13	0.03	9.83e-05	-0.21	0.06	0.000831	0.23
rs1934282	16836724	G	C	0.4115	-0.13	0.04	0.00156	-0.25	0.07	0.000831	0.14
rs7029285	16903948	A	G	0.3535	-0.13	0.03	0.000127	-0.21	0.06	0.000842	0.23
rs12344726	16905328	A	G	0.354	-0.13	0.03	8.94e-05	-0.21	0.06	0.000848	0.23
rs7032175	16904080	G	A	0.3535	-0.13	0.03	0.000137	-0.21	0.06	0.000869	0.23
c9_pos16894303	16904303	A	G	0.3525	-0.13	0.03	0.000104	-0.21	0.06	0.000876	0.23
rs7033194	16904705	T	C	0.353	-0.13	0.03	0.0001	-0.21	0.06	0.000891	0.23
rs7032581	16904355	G	A	0.3525	-0.13	0.03	0.000105	-0.21	0.06	0.000891	0.23
rs7033354	16904846	T	C	0.353	-0.13	0.03	9.44e-05	-0.21	0.06	0.000892	0.23
rs7033061	16904496	A	G	0.353	-0.13	0.03	0.000104	-0.21	0.06	0.000892	0.23
rs7032644	16904141	A	G	0.3525	-0.13	0.03	0.000104	-0.21	0.06	0.000921	0.23
rs57472299	16967082	A	AT	0.0545	0.19	0.07	0.00814	0.46	0.14	0.000984	0.08
rs7032420	16904202	G	A	0.3525	-0.13	0.03	0.000137	-0.2	0.06	0.00108	0.3
rs12236866	16980361	C	T	0.052	0.17	0.07	0.014	0.44	0.14	0.00138	0.08
rs191049701	16977884	C	A	0.052	0.18	0.07	0.0154	0.44	0.14	0.00152	0.1
rs75440556	16975118	T	C	0.0525	0.17	0.07	0.0158	0.43	0.14	0.00165	0.1
rs10118670	16472622	C	G	0.14	0.02	0.06	0.757	-0.34	0.11	0.00165	0
rs5896715	16881084	G	GT	0.2375	-0.09	0.05	0.0849	-0.3	0.09	0.00167	0.04
rs76905684	16974891	C	T	0.0525	0.17	0.07	0.0158	0.43	0.14	0.00171	0.1
rs28625569	16976947	G	C	0.053	0.17	0.07	0.0152	0.43	0.14	0.00172	0.1
rs12004542	16975043	T	C	0.054	0.17	0.07	0.0158	0.43	0.14	0.00181	0.1
rs10810661	16903850	G	A	0.333	-0.2	0.03	3.57e-09	-0.2	0.06	0.00183	1
rs10810567	16474985	C	T	0.1375	0.01	0.06	0.81	-0.34	0.11	0.00205	0.01
rs10511628	16969505	G	A	0.0525	0.17	0.07	0.0185	0.42	0.13	0.00218	0.09
rs10962777	16973031	T	C	0.0525	0.18	0.07	0.0146	0.42	0.14	0.0022	0.13
rs12350739	16885017	A	G	0.4355	-0.15	0.03	4.05e-06	-0.18	0.06	0.0023	0.65
rs10962787	16978279	G	C	0.053	0.17	0.07	0.0162	0.42	0.14	0.00239	0.11
rs10962776	16971593	G	C	0.053	0.17	0.07	0.0167	0.42	0.14	0.00243	0.11
rs201745812	16871042	GT	G	0.0225	-0.3	0.15	0.0408	-0.84	0.28	0.00251	0.09
rs10962775	16971241	C	G	0.052	0.17	0.07	0.0158	0.42	0.14	0.00257	0.11
rs78641474	16979194	A	G	0.0515	0.18	0.07	0.0155	0.42	0.14	0.00258	0.13
rs75142734	16969551	T	C	0.052	0.17	0.07	0.018	0.42	0.14	0.00266	0.11
rs5896719	16890214	A	AT	0.4655	0.3	0.05	2.09e-09	0.28	0.09	0.00269	0.85
rs78563040	16968431	A	C	0.0515	0.18	0.07	0.014	0.41	0.14	0.00283	0.14
rs77186134	16968481	T	C	0.052	0.17	0.07	0.0163	0.41	0.14	0.00283	0.13
rs76105489	16969471	G	T	0.0515	0.17	0.07	0.0166	0.41	0.14	0.00283	0.13
rs56752141	16982994	G	C	0.0505	0.17	0.07	0.0193	0.42	0.14	0.00284	0.11
rs10511629	16969197	G	A	0.0515	0.18	0.07	0.0147	0.41	0.14	0.00285	0.14
rs7856758	16968732	A	G	0.0535	0.17	0.07	0.0155	0.41	0.14	0.00308	0.13
rs35148237	16874875	G	GA	0.498	0.22	0.04	2.8e-09	0.2	0.07	0.00316	0.8
rs148676518	16850102	T	A	0.0175	0.39	0.21	0.074	1.19	0.41	0.00344	0.08
rs141705879	16935607	G	T	0.0095	-0.16	0.29	0.596	1.53	0.54	0.00491	0.01
rs12237646	16844506	T	C	0.361	0.07	0.04	0.0701	0.2	0.07	0.00507	0.11
rs35973674	17027928	C	CA	0.107	-0.13	0.05	0.0114	-0.27	0.1	0.00509	0.21
rs138947011	16506162	G	T	0.026	0.13	0.12	0.278	-0.65	0.23	0.00527	0
rs12004693	17028377	T	C	0.1075	-0.13	0.05	0.0117	-0.27	0.1	0.00535	0.21
rs10962640	16849464	C	G	0.2665	-0.13	0.04	0.000636	-0.19	0.07	0.00576	0.46
rs4961498	16843013	C	A	0.3525	-0.11	0.03	0.000811	-0.17	0.06	0.00606	0.37
rs80177210	16476807	A	C	0.027	0.09	0.12	0.449	-0.67	0.24	0.00637	0
rs2056684	16978916	G	A	0.268	0.11	0.04	0.0023	0.19	0.07	0.0065	0.32
rs145260190	16542850	T	C	0.026	0.14	0.11	0.225	-0.62	0.23	0.00665	0
rs10962694	16917676	A	G	0.168	-0.16	0.04	0.000164	-0.22	0.08	0.00676	0.5
9	16896778	G	A	0.335	0.3	0.06	1.07e-07	0.28	0.1	0.00688	0.86
rs10962791	16981899	A	G	0.0845	-0.23	0.06	5.47e-05	-0.29	0.11	0.00816	0.63
rs149685084	17090404	G	GATAATAATAATAATA	0.0335	-0.04	0.12	0.724	-0.54	0.2	0.00825	0.03
rs10962788	16980043	A	G	0.088	-0.23	0.06	8.13e-05	-0.28	0.11	0.00833	0.69
rs10962792	16982414	T	A	0.0845	-0.24	0.06	5.32e-05	-0.28	0.11	0.00836	0.75
rs117154828	16568562	T	C	0.025	0.13	0.12	0.267	-0.61	0.23	0.00882	0
rs138117140	16978907	G	A	0.085	-0.23	0.06	6.73e-05	-0.28	0.11	0.00893	0.69
rs141451708	16978723	G	A	0.085	-0.23	0.06	6.74e-05	-0.28	0.11	0.00904	0.69
rs142103789	17179841	CTCTAAAG	C	0.2235	0.01	0.04	0.794	0.2	0.08	0.00924	0.03
rs147443539	16475467	C	CTAAT	0.0685	-0.02	0.07	0.82	-0.34	0.13	0.00925	0.03
rs13285126	17377629	C	A	0.227	0.01	0.04	0.844	0.21	0.08	0.00949	0.03
rs755180	16474002	A	G	0.2615	-0.03	0.04	0.455	-0.21	0.08	0.00954	0.04
rs147831210	16977903	C	T	0.085	-0.23	0.06	6.87e-05	-0.28	0.11	0.00956	0.69
rs16935618	17402129	G	A	0.0255	0.21	0.17	0.21	-0.83	0.32	0.00978	0
rs60964536	17403828	C	T	0.0265	0.2	0.17	0.235	-0.81	0.32	0.0101	0.01
rs62560465	17022219	C	A	0.076	-0.21	0.06	0.000585	-0.29	0.11	0.0105	0.52
c9_pos16974590	16984590	G	C	0.2605	0.09	0.04	0.0128	0.18	0.07	0.0106	0.26
rs10962793	16982735	G	A	0.085	-0.23	0.06	6.46e-05	-0.27	0.11	0.0107	0.75
rs7024458	16478057	C	A	0.066	-0.02	0.07	0.799	-0.34	0.13	0.0107	0.03
rs201375194	16714246	ACTAT	A	0.0055	-0.01	0.34	0.969	-1.38	0.54	0.011	0.03
rs55788842	16917259	CA	C	0.2545	-0.24	0.05	2.81e-07	-0.22	0.09	0.0114	0.85
rs10810642	16841515	A	G	0.4365	0.04	0.03	0.212	0.15	0.06	0.0114	0.1
rs78700738	17021665	T	C	0.076	-0.21	0.06	0.000543	-0.29	0.11	0.0115	0.52
rs147405326	16972005	TC	T	0.084	-0.24	0.06	5.77e-05	-0.27	0.11	0.0116	0.81
rs28571854	16472947	C	T	0.069	-0.01	0.07	0.903	-0.33	0.13	0.0116	0.03
rs75885837	16974257	T	C	0.084	-0.23	0.06	6.64e-05	-0.27	0.11	0.0118	0.75
rs10962780	16975096	T	C	0.084	-0.23	0.06	6.95e-05	-0.27	0.11	0.0118	0.75
rs112803367	17023750	G	A	0.077	-0.21	0.06	0.000645	-0.28	0.11	0.0118	0.58
rs55978425	16964978	G	C	0.084	-0.24	0.06	5.64e-05	-0.27	0.11	0.0119	0.81
rs10122934	16477357	C	T	0.069	0	0.07	0.952	-0.33	0.13	0.0119	0.03
rs117917159	16965616	T	C	0.0835	-0.24	0.06	4.97e-05	-0.27	0.11	0.0121	0.81
rs143521017	16967953	CTG	C	0.084	-0.24	0.06	5.1e-05	-0.27	0.11	0.0121	0.81
rs76809723	16971912	C	G	0.084	-0.24	0.06	5.74e-05	-0.27	0.11	0.0123	0.81
rs10962779	16974010	A	T	0.085	-0.23	0.06	6.52e-05	-0.27	0.11	0.0123	0.75
rs79439080	17040820	G	A	0.0765	-0.21	0.06	0.000668	-0.28	0.11	0.0123	0.58
rs74524793	17040637	C	T	0.0765	-0.21	0.06	0.000669	-0.28	0.11	0.0123	0.58
rs76975494	17025447	T	G	0.0765	-0.21	0.06	0.000687	-0.28	0.11	0.0123	0.58
rs77281847	17040281	C	T	0.0765	-0.21	0.06	0.00067	-0.28	0.11	0.0124	0.58
rs56134369	16964849	C	G	0.084	-0.24	0.06	4.89e-05	-0.27	0.11	0.0125	0.81
rs7045198	16917672	G	T	0.3535	-0.14	0.04	6.97e-05	-0.17	0.07	0.0125	0.71
rs35311962	17143153	T	C	0.2295	0.01	0.04	0.812	0.19	0.08	0.0125	0.04
rs10962778	16973617	C	T	0.084	-0.23	0.06	6.61e-05	-0.27	0.11	0.0126	0.75
rs79668955	17034383	A	G	0.0785	-0.2	0.06	0.000919	-0.28	0.11	0.0126	0.52
rs10810735	17132432	G	A	0.3215	0.03	0.04	0.38	0.17	0.07	0.0126	0.08
rs78214581	17039684	G	A	0.077	-0.21	0.06	0.000649	-0.28	0.11	0.0127	0.58
rs10962781	16975258	A	G	0.0855	-0.23	0.06	7.84e-05	-0.27	0.11	0.0128	0.75
rs7046884	16476144	G	A	0.0685	-0.01	0.07	0.934	-0.33	0.13	0.0129	0.03
rs56316548	17031532	T	C	0.078	-0.21	0.06	0.000694	-0.28	0.11	0.013	0.58
rs200322776	17264474	A	G	0.0215	0.07	0.17	0.676	-0.78	0.31	0.013	0.02
rs75041907	17038460	C	T	0.0765	-0.21	0.06	0.000522	-0.28	0.11	0.0131	0.58
rs35278403	17282826	C	T	0.196	0.01	0.04	0.836	0.21	0.08	0.0131	0.03
rs112488223	17027407	G	A	0.076	-0.21	0.06	0.00061	-0.28	0.11	0.0133	0.58
rs55895101	17031056	C	T	0.0765	-0.21	0.06	0.000677	-0.28	0.11	0.0133	0.58
rs78965856	17029869	C	A	0.0765	-0.21	0.06	0.000699	-0.28	0.11	0.0133	0.58
rs34586990	17165040	G	A	0.2115	0.01	0.04	0.786	0.2	0.08	0.0133	0.03
rs111991906	17033175	C	T	0.0765	-0.21	0.06	0.000657	-0.28	0.11	0.0134	0.58
rs55814049	17026505	G	T	0.078	-0.21	0.06	0.000682	-0.28	0.11	0.0134	0.58
rs10962721	16931757	T	C	0.0945	-0.19	0.05	0.000473	-0.26	0.1	0.0135	0.53
rs72718111	16985589	A	C	0.26	0.09	0.04	0.0111	0.17	0.07	0.0135	0.32
rs12684159	17017674	T	C	0.0795	-0.2	0.06	0.000967	-0.27	0.11	0.0136	0.58
rs10962725	16933037	G	A	0.094	-0.18	0.05	0.00126	-0.25	0.1	0.0143	0.53
rs2274557	16473118	T	C	0.2615	-0.03	0.04	0.466	-0.2	0.08	0.0143	0.06
rs12685003	17022667	A	G	0.0865	-0.17	0.06	0.00277	-0.26	0.11	0.0145	0.47
rs59717315	16877354	C	T	0.432	-0.07	0.05	0.207	-0.25	0.1	0.0145	0.11
rs75998941	16845313	CT	C	0.153	-0.08	0.05	0.0856	-0.22	0.09	0.0146	0.17
rs149928205	17387415	G	T	0.0265	0.05	0.17	0.766	0.83	0.34	0.0147	0.04
rs13283347	17130280	T	C	0.3235	0.03	0.04	0.413	0.17	0.07	0.0148	0.08
rs371951454	16925007	G	A	0.1965	-0.18	0.04	2.17e-05	-0.19	0.08	0.0151	0.91
rs144837332	17019918	C	CT	0.0765	-0.22	0.06	0.000419	-0.27	0.11	0.0152	0.69
rs4961499	16844949	A	G	0.123	-0.13	0.05	0.00729	-0.22	0.09	0.0153	0.38
rs10810645	16845726	G	A	0.4045	-0.13	0.03	9.03e-05	-0.15	0.06	0.0154	0.77
rs78245906	17017993	G	C	0.077	-0.22	0.06	0.000431	-0.27	0.11	0.0156	0.69
rs74885297	17018081	T	C	0.077	-0.22	0.06	0.000431	-0.27	0.11	0.0156	0.69
rs76286078	16535051	T	C	0.008	-0.24	0.27	0.394	1.25	0.51	0.0157	0.01
rs3762426	17019516	T	G	0.0765	-0.22	0.06	0.000425	-0.27	0.11	0.0159	0.69
rs144343452	16921606	G	A	0.0185	-0.26	0.15	0.0933	-0.67	0.27	0.0159	0.18
rs4493995	17134245	G	A	0.325	0.03	0.04	0.442	0.17	0.07	0.016	0.08
rs78218713	17018847	A	G	0.0765	-0.22	0.06	0.000436	-0.27	0.11	0.0162	0.69
rs62541876	16844653	C	T	0.1215	-0.14	0.05	0.00496	-0.22	0.09	0.0163	0.44
rs4961510	16962418	T	C	0.088	-0.23	0.06	6.99e-05	-0.26	0.11	0.0166	0.81
rs149531520	16500237	T	C	0.006	-0.27	0.36	0.464	-1.46	0.62	0.0167	0.1
rs4481710	17134263	T	A	0.325	0.03	0.04	0.435	0.17	0.07	0.0167	0.08
rs79776047	16485712	T	C	0.014	-0.12	0.22	0.607	0.98	0.41	0.017	0.02
rs1476253	17130665	C	A	0.334	0.03	0.04	0.386	0.16	0.07	0.0172	0.11
9	17062597	T	<INS:ME:ALU>	0.064	-0.23	0.07	0.00142	-0.31	0.13	0.0173	0.59
rs10511630	16962019	C	G	0.0875	-0.23	0.06	7.07e-05	-0.25	0.11	0.0178	0.87
rs112351052	17261603	T	C	0.015	0.25	0.22	0.249	-0.91	0.38	0.0178	0.01
rs56251924	16962982	T	C	0.086	-0.23	0.06	5.41e-05	-0.26	0.11	0.0179	0.81
rs118083906	17219806	A	T	0.0255	0.05	0.17	0.763	0.85	0.36	0.0179	0.04
rs80094183	17014703	A	G	0.089	-0.21	0.06	0.000269	-0.25	0.1	0.018	0.73
rs7029491	16986112	C	G	0.3285	0.11	0.03	0.000788	0.15	0.06	0.0183	0.55
rs11788776	16810347	T	C	0.463	0.14	0.04	0.00179	-0.2	0.08	0.0184	0
rs78272478	17013999	C	G	0.089	-0.21	0.06	0.000274	-0.25	0.1	0.0186	0.73
rs62558964	17363659	G	A	0.1805	0.02	0.05	0.731	0.22	0.09	0.019	0.05
rs62558967	17365445	G	C	0.1805	0.02	0.05	0.731	0.22	0.09	0.019	0.05
rs149365030	16996875	AT	A	0.089	-0.22	0.06	0.000157	-0.25	0.1	0.0197	0.8
rs112210553	16995830	C	T	0.089	-0.22	0.06	0.000157	-0.25	0.1	0.0197	0.8
rs141120011	16993939	A	ATTTC	0.089	-0.22	0.06	0.000159	-0.25	0.1	0.0197	0.8
rs56098873	16994696	G	A	0.089	-0.22	0.06	0.000161	-0.25	0.1	0.0197	0.8
rs150553433	16996399	TA	T	0.089	-0.22	0.06	0.000158	-0.25	0.1	0.0198	0.8
rs55873944	16993715	A	G	0.089	-0.22	0.06	0.000162	-0.25	0.1	0.0198	0.8
rs75027033	17011259	T	C	0.09	-0.21	0.06	0.000304	-0.25	0.1	0.02	0.73
rs56103268	16993488	G	A	0.089	-0.22	0.06	0.000163	-0.25	0.1	0.0201	0.8
rs79850388	16992238	A	G	0.089	-0.22	0.06	0.000162	-0.24	0.1	0.0202	0.86
rs78600569	16990325	A	G	0.0895	-0.22	0.06	0.000152	-0.25	0.1	0.0202	0.8
rs77969266	16992655	G	A	0.089	-0.22	0.06	0.000163	-0.25	0.1	0.0202	0.8
rs75714016	17012054	A	C	0.09	-0.21	0.06	0.00031	-0.25	0.1	0.0203	0.73
rs76538056	17011455	C	T	0.09	-0.21	0.06	0.000305	-0.24	0.1	0.0204	0.8
rs41306071	17135115	C	T	0.265	0.02	0.04	0.62	0.17	0.07	0.0208	0.06
rs76032660	16990617	G	A	0.089	-0.22	0.06	0.000141	-0.25	0.1	0.0209	0.8
rs35129748	17392885	A	C	0.1785	0.02	0.05	0.709	0.21	0.09	0.0209	0.06
c9_pos17030371	17040371	C	A	0.075	-0.12	0.07	0.061	-0.28	0.12	0.0212	0.25
rs77632083	17007505	C	T	0.0895	-0.2	0.06	0.000304	-0.24	0.1	0.0218	0.73
rs183360869	16938688	A	T	0.0855	-0.24	0.06	2.57e-05	-0.25	0.11	0.0219	0.94
rs141012013	16938587	A	G	0.0855	-0.24	0.06	2.58e-05	-0.25	0.11	0.0219	0.94
rs74339678	16998766	C	G	0.0885	-0.21	0.06	0.00018	-0.24	0.1	0.022	0.8
9	16948216	G	T	0.086	-0.25	0.06	2.23e-05	-0.25	0.11	0.0226	1
rs72700140	17008501	A	T	0.0975	-0.18	0.05	0.00115	-0.23	0.1	0.0229	0.65
rs74868858	17002038	T	C	0.0895	-0.21	0.06	0.000244	-0.24	0.1	0.023	0.8
rs76938895	17007112	T	C	0.09	-0.2	0.06	0.000309	-0.24	0.1	0.0233	0.73
rs414099	17024441	A	G	0.151	-0.1	0.04	0.0322	-0.19	0.08	0.0235	0.31
rs141242427	16937991	C	T	0.086	-0.24	0.06	2.47e-05	-0.24	0.11	0.0236	1
rs80153037	17003999	A	G	0.0895	-0.21	0.06	0.000261	-0.24	0.1	0.0237	0.8
rs76662255	17249649	G	A	0.088	0.01	0.07	0.873	0.33	0.14	0.0242	0.04
rs80006137	16948819	A	G	0.0855	-0.25	0.06	2.27e-05	-0.24	0.11	0.0248	0.94
rs79476472	17004288	T	C	0.0885	-0.21	0.06	0.000224	-0.24	0.1	0.025	0.8
rs55725957	16961282	C	CCCT	0.085	-0.24	0.06	3.84e-05	-0.24	0.11	0.0252	1
rs7030293	16493836	C	T	0.333	-0.05	0.06	0.353	0.23	0.1	0.0252	0.02
rs111496959	17135443	T	C	0.265	0.02	0.04	0.617	0.17	0.07	0.0257	0.06
rs12377884	16939718	G	T	0.0915	-0.23	0.06	4.34e-05	-0.24	0.1	0.0259	0.93
rs118072440	16952486	C	T	0.0855	-0.25	0.06	2.23e-05	-0.24	0.11	0.0261	0.94
rs111946979	17368125	G	A	0.015	0.23	0.21	0.293	-0.84	0.37	0.0263	0.01
rs111755670	17291683	G	C	0.015	0.23	0.21	0.293	-0.84	0.38	0.0264	0.01
rs77739273	16988961	A	G	0.087	-0.22	0.06	0.000136	-0.24	0.11	0.0267	0.87
rs112343438	17154863	A	G	0.016	0.2	0.21	0.344	-0.85	0.38	0.027	0.02
rs7030959	16917926	T	C	0.207	-0.12	0.04	0.0028	-0.17	0.08	0.0271	0.58
rs201633449	16918175	AT	A	0.086	-0.26	0.06	7.89e-06	-0.24	0.11	0.0272	0.87
c9_pos16940269	16950269	G	C	0.0895	-0.24	0.06	2.45e-05	-0.23	0.11	0.028	0.94
rs414716	17132343	G	A	0.3415	0.04	0.04	0.288	0.15	0.07	0.028	0.17
rs79603776	16932537	C	T	0.086	-0.25	0.06	1.35e-05	-0.23	0.11	0.0286	0.87
rs76521713	16451601	C	T	0.015	0.18	0.21	0.398	-0.78	0.35	0.0286	0.02
rs10962724	16932860	C	T	0.086	-0.25	0.06	1.37e-05	-0.23	0.11	0.0288	0.87
c9_pos16831757	16841757	A	G	0.124	-0.12	0.05	0.014	-0.2	0.09	0.029	0.44
rs117255122	16930305	G	C	0.0865	-0.25	0.06	1.42e-05	-0.23	0.11	0.0292	0.87
rs17744040	16842137	T	C	0.1245	-0.12	0.05	0.0169	-0.2	0.09	0.0292	0.44
rs263640	17019121	G	A	0.0835	-0.17	0.06	0.00317	-0.23	0.11	0.0294	0.63
rs149410398	16929313	T	C	0.0865	-0.25	0.06	1.49e-05	-0.23	0.11	0.0295	0.87
rs79425330	17386382	A	G	0.025	0.23	0.17	0.162	-0.69	0.32	0.0297	0.01
rs10962723	16932086	C	G	0.087	-0.25	0.06	1.39e-05	-0.23	0.1	0.0298	0.86
rs10962719	16931410	T	C	0.0875	-0.25	0.06	1.46e-05	-0.23	0.1	0.0298	0.86
rs10962720	16931441	A	G	0.0875	-0.25	0.06	1.46e-05	-0.23	0.1	0.0298	0.86
c9_pos16996901	17006901	T	C	0.0925	-0.2	0.06	0.000367	-0.23	0.1	0.0298	0.8
rs35376870	17111999	G	A	0.239	0.04	0.04	0.257	0.16	0.07	0.0299	0.14
rs12377036	16933700	T	C	0.0875	-0.25	0.06	1.45e-05	-0.23	0.1	0.0301	0.86
rs263603	17095980	T	C	0.32	0.11	0.04	0.00291	0.15	0.07	0.0302	0.62
9	17294861	A	G	0.162	0.03	0.05	0.516	-0.2	0.09	0.0312	0.03
rs10962699	16920050	G	A	0.0865	-0.25	0.06	1.2e-05	-0.23	0.11	0.0315	0.87
rs372582	17130074	G	A	0.344	0.03	0.04	0.354	0.15	0.07	0.0319	0.14
rs263654	17009876	A	T	0.096	-0.18	0.06	0.00114	-0.22	0.1	0.0324	0.73
rs142410908	16999915	CATGTCAATG	C	0.0855	-0.21	0.06	0.000259	-0.23	0.11	0.0328	0.87
rs55816722	16926894	AC	A	0.0865	-0.25	0.06	1.33e-05	-0.23	0.11	0.0333	0.87
rs140816514	16926301	A	G	0.0865	-0.25	0.06	1.34e-05	-0.23	0.11	0.0334	0.87
rs150330757	16926130	C	G	0.086	-0.25	0.06	1.38e-05	-0.23	0.11	0.0337	0.87
rs72700141	17013970	C	T	0.0145	-0.33	0.19	0.0826	-0.73	0.34	0.0338	0.3
rs10962770	16959711	C	T	0.085	-0.24	0.06	3.24e-05	-0.23	0.11	0.0339	0.94
rs62558260	17080071	C	T	0.2725	0.07	0.04	0.0605	0.15	0.07	0.034	0.32
rs10962701	16923304	G	A	0.0865	-0.25	0.06	1.36e-05	-0.23	0.11	0.0344	0.87
rs10962703	16923585	T	G	0.0865	-0.25	0.06	1.36e-05	-0.23	0.11	0.0345	0.87
rs10962704	16923927	C	A	0.0875	-0.24	0.06	2.1e-05	-0.22	0.1	0.0347	0.86
rs10962706	16925359	T	C	0.086	-0.25	0.06	1.38e-05	-0.23	0.11	0.0348	0.87
rs10962707	16927732	T	C	0.0875	-0.25	0.06	1.38e-05	-0.22	0.1	0.0357	0.8
rs411167	17130360	T	C	0.3465	0.03	0.04	0.359	0.14	0.07	0.0357	0.17
rs11793518	16470863	A	G	0.278	-0.03	0.04	0.428	-0.17	0.08	0.0358	0.12
rs10962695	16918296	G	A	0.087	-0.25	0.06	8.93e-06	-0.22	0.1	0.036	0.8
rs10962769	16959695	C	G	0.087	-0.24	0.06	2.86e-05	-0.22	0.11	0.0362	0.87
rs55813831	16958580	T	A	0.0855	-0.25	0.06	2.33e-05	-0.23	0.11	0.0364	0.87
rs55995817	16958583	C	T	0.0855	-0.25	0.06	2.33e-05	-0.23	0.11	0.0364	0.87
rs79325352	16975800	G	A	0.009	-0.01	0.19	0.958	0.73	0.34	0.0364	0.06
rs10962766	16956687	G	T	0.085	-0.25	0.06	1.98e-05	-0.23	0.11	0.037	0.87
rs6475084	16841349	T	A	0.124	-0.11	0.05	0.0199	-0.19	0.09	0.037	0.44
c9_pos16912173	16922173	T	A	0.087	-0.25	0.06	1.21e-05	-0.22	0.1	0.0371	0.8
rs34829493	17095676	C	A	0.3175	0.11	0.04	0.00291	0.14	0.07	0.0371	0.71
rs10962698	16919692	C	T	0.087	-0.25	0.06	1.17e-05	-0.22	0.1	0.0372	0.8
c9_pos16944214	16954214	C	A	0.087	-0.24	0.06	2.59e-05	-0.22	0.11	0.0375	0.87
rs112488789	17284942	C	A	0.014	0.3	0.23	0.198	-0.9	0.43	0.0375	0.01
rs2481550	17000932	C	G	0.0925	-0.19	0.05	0.000691	-0.21	0.1	0.0376	0.86
rs10962700	16920785	C	A	0.087	-0.25	0.06	1.21e-05	-0.22	0.1	0.0384	0.8
rs58886894	17115414	G	A	0.2855	0.07	0.04	0.0711	0.14	0.07	0.0388	0.39
rs79844200	16940825	T	C	0.0825	-0.25	0.06	3.13e-05	-0.23	0.11	0.0392	0.87
rs59720300	17115361	G	C	0.2855	0.07	0.04	0.0709	0.14	0.07	0.0392	0.39
9	17119232	A	AATAG	0.4775	0.12	0.04	0.000506	0.14	0.07	0.0399	0.8
rs1487505	17000713	A	T	0.0935	-0.19	0.05	0.000828	-0.21	0.1	0.04	0.86
rs112575090	17297091	T	C	0.045	-0.22	0.08	0.00681	-0.3	0.15	0.0401	0.64
rs117292419	16983670	A	C	0.01	-0.05	0.19	0.78	0.72	0.34	0.0401	0.05
rs78359995	17309311	A	G	0.045	-0.22	0.08	0.00679	-0.3	0.15	0.0402	0.64
rs1487504	17000855	G	A	0.093	-0.19	0.05	0.000726	-0.21	0.1	0.0407	0.86
rs13298182	17075077	A	G	0.254	0.07	0.04	0.0527	0.15	0.07	0.0407	0.32
rs34303558	17094537	A	G	0.3185	0.11	0.04	0.00269	0.14	0.07	0.0408	0.71
rs62560531	17073962	C	T	0.2565	0.07	0.04	0.0597	0.15	0.07	0.0408	0.32
rs146981520	16922171	T	A	0.0125	0.32	0.22	0.148	0.83	0.4	0.0409	0.26
rs10962790	16981782	A	C	0.2135	-0.15	0.04	0.000176	-0.15	0.07	0.041	1
rs62560532	17074141	C	T	0.2565	0.07	0.04	0.0597	0.15	0.07	0.0411	0.32
rs10962446	16485097	G	C	0.253	-0.02	0.04	0.632	-0.17	0.08	0.0412	0.09
rs113319499	16848867	C	G	0.0065	0.79	0.29	0.00674	1.07	0.51	0.0414	0.63
rs28704646	16480626	G	C	0.0535	-0.01	0.08	0.87	-0.28	0.14	0.0416	0.09
rs35138991	16972437	GT	G	0.3925	0.04	0.04	0.323	0.14	0.07	0.0419	0.21
c9_pos16974609	16984609	A	G	0.092	-0.22	0.05	0.000102	-0.21	0.1	0.0428	0.93
9	17119304	AAATAACAGAT	A	0.2915	0.08	0.04	0.0337	0.14	0.07	0.0428	0.46
rs10962761	16949644	G	C	0.084	-0.25	0.06	1.84e-05	-0.22	0.11	0.0432	0.81
rs12376763	16987837	T	C	0.0925	-0.24	0.06	2.38e-05	-0.21	0.1	0.0434	0.8
rs10962440	16479222	T	A	0.015	-0.13	0.21	0.557	0.8	0.39	0.0434	0.04
rs28701032	16480565	C	T	0.053	-0.01	0.08	0.893	-0.28	0.14	0.0436	0.09
rs28523679	16480476	C	T	0.053	-0.01	0.08	0.893	-0.28	0.14	0.0436	0.09
rs147673759	17134318	A	G	0.006	0.03	0.27	0.905	0.88	0.44	0.0447	0.1
rs79857260	16485362	T	G	0.057	-0.02	0.08	0.766	-0.28	0.14	0.0449	0.11
rs35820984	17112944	G	A	0.2725	0.06	0.04	0.0998	0.14	0.07	0.0452	0.32
rs56216509	16987919	C	T	0.091	-0.24	0.06	2.79e-05	-0.21	0.1	0.0456	0.8
rs35979939	17116411	C	T	0.273	0.06	0.04	0.0973	0.14	0.07	0.0457	0.32
rs78974792	16986962	T	C	0.091	-0.23	0.06	6.95e-05	-0.21	0.1	0.0464	0.86
rs35060066	17126496	C	T	0.2635	0.06	0.04	0.136	0.14	0.07	0.0465	0.32
rs118036419	16673829	G	A	0.0245	0.11	0.13	0.407	-0.51	0.25	0.0468	0.03
rs12378078	16945241	C	T	0.083	-0.25	0.06	2.56e-05	-0.22	0.11	0.0474	0.81
rs10962750	16944135	G	A	0.083	-0.25	0.06	2.54e-05	-0.22	0.11	0.0478	0.81
rs55646263	16988024	AG	A	0.0955	-0.23	0.06	4.01e-05	-0.21	0.1	0.0481	0.86
c9_pos16932917	16942917	A	G	0.084	-0.24	0.06	2.88e-05	-0.21	0.11	0.0487	0.81
rs10962745	16941719	G	T	0.084	-0.24	0.06	2.89e-05	-0.21	0.11	0.0487	0.81
rs7864078	16975940	T	G	0.2135	-0.15	0.04	0.00015	-0.14	0.07	0.0494	0.9
rs79556229	16482641	G	A	0.0515	-0.01	0.08	0.849	-0.28	0.14	0.05	0.09
rs113133695	16882340	G	C	0.0115	-0.09	0.22	0.692	0.79	0.39	0.0503	0.05
rs10962757	16947148	G	C	0.084	-0.24	0.06	3.37e-05	-0.21	0.11	0.051	0.81
rs34760530	17095076	T	C	0.2805	0.06	0.04	0.12	0.14	0.07	0.0516	0.32
rs79575950	16483455	A	G	0.056	-0.03	0.08	0.744	-0.27	0.14	0.0519	0.14
rs80093082	16482104	G	A	0.0515	-0.01	0.08	0.858	-0.28	0.14	0.0521	0.09
rs75179897	16481630	C	T	0.0515	-0.01	0.08	0.857	-0.28	0.14	0.0522	0.09
9	17023805	G	GA	0.139	-0.02	0.05	0.619	-0.17	0.09	0.0531	0.15
rs11788180	17107016	G	A	0.031	-0.28	0.12	0.0256	-0.43	0.22	0.0546	0.55
rs367552732	16962026	CAAT	C	0.01	0.01	0.18	0.966	0.66	0.34	0.0547	0.09
rs59372891	16447570	C	T	0.0815	0.03	0.06	0.646	-0.23	0.12	0.0559	0.05
rs34748774	16659145	CGG	C	0.228	-0.09	0.06	0.168	0.23	0.12	0.0564	0.02
rs2774633	17070633	A	G	0.2865	0.06	0.04	0.0982	0.13	0.07	0.0568	0.39
rs78186258	16480058	A	G	0.0525	-0.01	0.08	0.862	-0.27	0.14	0.0577	0.11
rs74503336	16842707	AT	A	0.0145	0.24	0.24	0.314	0.9	0.47	0.0581	0.21
rs13297390	17092997	T	C	0.283	0.06	0.04	0.0976	0.13	0.07	0.0587	0.39
rs78505148	16481722	T	C	0.0545	-0.03	0.08	0.662	-0.27	0.14	0.0588	0.14
rs7848996	17097019	A	T	0.291	0.07	0.04	0.0683	0.13	0.07	0.0589	0.46
rs77257470	16479560	C	T	0.0525	-0.01	0.08	0.865	-0.27	0.14	0.0595	0.11
rs13297644	16467709	T	C	0.3655	-0.05	0.04	0.154	-0.13	0.07	0.0598	0.32
rs10962884	17143598	G	A	0.094	0.06	0.06	0.289	-0.2	0.11	0.06	0.04
rs78681077	16937364	C	G	0.0235	-0.09	0.12	0.453	-0.45	0.24	0.0611	0.18
rs2129626	17071162	A	C	0.284	0.06	0.04	0.091	0.13	0.07	0.0613	0.39
rs75143555	16937666	A	C	0.0235	-0.09	0.12	0.456	-0.45	0.24	0.0617	0.18
rs146103333	16444233	T	TAC	0.0115	-0.06	0.21	0.786	0.75	0.4	0.0623	0.07
rs199503309	16905625	A	T	0.0455	0.2	0.09	0.0257	0.3	0.16	0.0625	0.59
rs55672367	16983862	C	T	0.2315	-0.15	0.04	0.000218	-0.14	0.07	0.0635	0.9
rs17743955	16836893	G	C	0.1145	-0.11	0.05	0.0542	-0.19	0.1	0.064	0.47
9	16463355	C	T	0.0075	-0.07	0.3	0.825	-0.91	0.49	0.064	0.14
rs144045209	16482455	GA	G	0.0555	-0.01	0.08	0.887	-0.26	0.14	0.066	0.12
rs57307009	17074239	AT	A	0.38	0.05	0.04	0.178	0.13	0.07	0.0665	0.32
rs13293887	17044586	G	T	0.2775	0.07	0.04	0.0408	0.12	0.07	0.0675	0.54
rs79721685	16651286	A	T	0.022	0.12	0.16	0.478	-0.53	0.29	0.068	0.05
rs55863202	17210004	T	C	0.0325	-0.12	0.1	0.243	-0.32	0.17	0.0683	0.31
9	16857478	T	TAAAAAAA	0.29	-0.09	0.04	0.0323	-0.14	0.08	0.0688	0.58
rs11998905	16845998	A	G	0.121	-0.24	0.05	2.85e-06	-0.18	0.1	0.0689	0.59
rs77122352	16646578	C	G	0.022	0.11	0.16	0.51	-0.53	0.29	0.0691	0.05
rs1999032	16416995	T	C	0.4635	-0.01	0.03	0.802	-0.12	0.06	0.0698	0.1
rs117452684	16419519	G	A	0.0295	-0.08	0.13	0.554	-0.43	0.24	0.0715	0.2
rs79116087	17137405	C	T	0.0515	-0.21	0.08	0.00761	-0.25	0.14	0.0717	0.8
rs10738472	17185100	T	C	0.014	-0.35	0.2	0.0757	-0.66	0.37	0.0727	0.46
rs76914288	16654036	C	A	0.022	0.1	0.16	0.538	-0.52	0.29	0.0737	0.06
rs139614646	16418871	G	GCACACACA	0.336	-0.05	0.04	0.226	-0.12	0.07	0.0738	0.39
rs151099757	16434675	A	G	0.012	0.07	0.2	0.745	-0.59	0.33	0.0745	0.09
rs7870287	17204019	T	C	0.118	0.07	0.05	0.158	-0.17	0.09	0.0758	0.02
9	17086976	T	C	0.0055	0.06	0.23	0.805	0.8	0.44	0.0759	0.14
rs10962808	17002275	A	G	0.1355	-0.05	0.05	0.298	-0.16	0.09	0.0771	0.29
rs75365826	17089123	A	C	0.0085	-0.01	0.2	0.96	0.69	0.39	0.0783	0.11
rs263635	17022777	A	C	0.13	-0.13	0.05	0.00812	-0.16	0.09	0.0786	0.77
rs10962746	16942532	A	C	0.0065	0.54	0.25	0.0356	-0.88	0.5	0.079	0.01
c9_pos16984222	16994222	G	A	0.0395	0.02	0.08	0.85	0.25	0.14	0.0792	0.15
rs76590722	17053235	T	C	0.1195	0	0.05	0.988	-0.16	0.09	0.0792	0.12
c9_pos16999807	17009807	A	G	0.014	-0.1	0.14	0.457	-0.48	0.27	0.0799	0.21
rs56053097	17138074	C	T	0.0505	-0.21	0.08	0.00858	-0.25	0.14	0.08	0.8
rs10962448	16489892	C	T	0.0155	-0.17	0.23	0.448	0.77	0.44	0.0802	0.06
rs139823578	16418662	C	CTG	0.309	-0.06	0.04	0.13	-0.13	0.07	0.0804	0.39
rs150306062	16998667	G	GGATT	0.13	-0.06	0.05	0.242	-0.15	0.09	0.0806	0.38
rs140004267	16812984	A	T	0.16	-0.08	0.07	0.247	0.21	0.12	0.0807	0.04
rs78603147	17314633	T	C	0.023	-0.16	0.13	0.208	-0.41	0.23	0.0814	0.34
rs7036214	16936474	T	C	0.032	-0.12	0.09	0.214	0.27	0.15	0.0822	0.03
rs79707047	17069448	A	T	0.283	0.06	0.04	0.0747	0.12	0.07	0.0839	0.46
rs9298764	16431230	A	G	0.4565	-0.01	0.03	0.688	-0.11	0.06	0.0845	0.14
rs5896690	16421862	C	CCT	0.448	-0.01	0.03	0.665	-0.11	0.06	0.0855	0.14
rs113842957	17241002	G	A	0.0175	-0.26	0.15	0.0823	-0.46	0.27	0.0875	0.52
rs117756613	16828091	T	C	0.006	-0.74	0.38	0.0524	1.1	0.64	0.0883	0.01
rs10962813	17006147	T	G	0.13	-0.06	0.05	0.254	-0.15	0.09	0.0888	0.38
rs55863214	17363422	G	C	0.072	-0.06	0.06	0.319	-0.19	0.11	0.0888	0.3
rs10962420	16423076	A	C	0.1165	0.02	0.07	0.763	0.23	0.13	0.0892	0.15
rs115801985	16937127	C	G	0.0325	-0.12	0.09	0.2	0.26	0.15	0.0903	0.03
rs192184387	16890983	G	A	0.0105	-0.29	0.24	0.238	-0.84	0.49	0.0911	0.31
9	16469196	A	G	0.403	-0.04	0.04	0.236	-0.12	0.07	0.0914	0.32
rs72717022	16472362	G	C	0.009	-0.14	0.3	0.648	0.88	0.52	0.0916	0.09
rs997694	16484870	T	C	0.307	-0.03	0.04	0.531	-0.13	0.08	0.0923	0.26
rs36076722	17067473	A	G	0.2835	0.06	0.04	0.0689	0.11	0.07	0.0928	0.54
rs10810786	17400370	G	C	0.4625	0.08	0.03	0.0226	-0.11	0.06	0.0931	0
rs1032217	16982584	A	G	0.1815	0.01	0.04	0.832	0.13	0.08	0.0932	0.18
rs142948936	16515657	C	T	0.0075	-0.04	0.32	0.905	-0.85	0.5	0.0935	0.17
rs4961718	16446156	A	C	0.4575	-0.01	0.03	0.698	-0.11	0.06	0.0937	0.14
rs80023160	16849647	G	A	0.0075	-0.31	0.32	0.332	-1.1	0.65	0.094	0.28
rs144013719	16479006	T	C	0.046	-0.03	0.08	0.719	-0.25	0.15	0.0941	0.2
rs115592788	16553972	G	C	0.024	0.01	0.15	0.938	-0.45	0.27	0.0945	0.14
rs2274916	17388125	C	T	0.0805	-0.04	0.06	0.522	-0.18	0.11	0.0951	0.26
rs7041461	16985146	C	T	0.409	-0.1	0.03	0.00213	-0.1	0.06	0.0956	1
rs1442524	17391822	C	G	0.4285	0.08	0.04	0.0355	-0.11	0.07	0.0961	0.02
rs148013115	16837363	G	A	0.0095	-0.22	0.24	0.369	-0.79	0.47	0.0966	0.28
rs118119691	16447440	A	T	0.0295	-0.08	0.13	0.529	-0.4	0.24	0.0966	0.24
rs6475123	17244616	T	C	0.082	-0.05	0.06	0.369	-0.18	0.11	0.0967	0.3
rs10962522	16657540	G	C	0.0455	-0.01	0.13	0.945	-0.4	0.24	0.0967	0.15
rs12344890	16845516	G	A	0.275	-0.04	0.04	0.292	-0.13	0.08	0.0969	0.31
rs181205185	16550256	T	G	0.0075	0.04	0.31	0.892	-0.81	0.49	0.0976	0.14
rs60704340	16850807	TA	T	0.4055	-0.08	0.04	0.0647	-0.13	0.08	0.0979	0.58
rs114425667	16554076	C	T	0.0235	0.01	0.15	0.935	-0.46	0.27	0.0979	0.13
rs201739499	16469191	AGT	A	0.3915	-0.04	0.04	0.255	-0.12	0.07	0.0994	0.32
rs16934614	16411184	T	C	0.011	-0.02	0.26	0.943	0.82	0.49	0.0996	0.13
c9_pos17050122	17060122	C	T	0.2795	0.06	0.04	0.0814	0.11	0.07	0.101	0.54
rs200587639	17256559	C	CT	0.078	-0.07	0.06	0.294	-0.18	0.11	0.101	0.38
rs78530219	16797314	C	T	0.009	0.17	0.31	0.596	-0.92	0.56	0.101	0.09
rs145296862	17211883	C	T	0.038	0.23	0.11	0.0465	-0.36	0.22	0.101	0.02
rs140733938	17396456	C	T	0.0075	0.5	0.24	0.0405	-0.66	0.4	0.101	0.01
rs140238929	17359413	A	G	0.018	-0.33	0.17	0.0612	-0.54	0.33	0.102	0.57
rs59987611	16469200	GC	G	0.391	-0.04	0.04	0.255	-0.12	0.07	0.102	0.32
rs61022457	16469202	TC	T	0.391	-0.04	0.04	0.255	-0.12	0.07	0.102	0.32
rs717267	16408826	G	A	0.4035	-0.02	0.03	0.554	-0.11	0.06	0.102	0.18
rs34325917	16705677	GT	G	0.179	-0.13	0.06	0.0349	0.19	0.12	0.102	0.02
rs113450918	16952080	A	G	0.0205	0.22	0.12	0.0641	0.37	0.22	0.103	0.55
rs62560516	17058901	T	G	0.277	0.06	0.04	0.0786	0.11	0.07	0.103	0.54
rs10962504	16598985	G	C	0.0465	-0.02	0.13	0.884	-0.38	0.23	0.103	0.17
rs200427289	17325376	A	ATGTG	0.161	0.01	0.05	0.857	-0.15	0.09	0.103	0.12
rs7021182	16447809	A	T	0.4635	-0.01	0.03	0.661	-0.1	0.06	0.104	0.18
rs10756755	16513373	C	T	0.1405	-0.05	0.06	0.424	0.19	0.11	0.104	0.06
rs10962741	16941252	A	C	0.0065	0.52	0.25	0.0419	-0.81	0.5	0.104	0.02
rs366216	17053484	C	A	0.32	0.06	0.03	0.0608	0.11	0.07	0.105	0.51
rs7862481	16468305	A	T	0.37	-0.05	0.04	0.199	-0.11	0.07	0.106	0.46
rs1927639	16457271	C	G	0.3685	-0.04	0.03	0.282	-0.11	0.06	0.106	0.3
rs138018077	16418440	TGGCCCCTCAA	T	0.351	-0.04	0.03	0.274	-0.11	0.07	0.107	0.36
rs113937785	16463516	A	G	0.0905	0	0.08	0.994	0.24	0.15	0.108	0.16
rs10121841	17384923	G	A	0.429	0.07	0.04	0.0401	-0.11	0.07	0.108	0.03
rs72409984	17401812	T	TTAA	0.468	0.08	0.03	0.0286	-0.11	0.07	0.109	0.01
rs7019539	16966188	A	G	0.306	0.01	0.03	0.846	0.11	0.07	0.11	0.19
rs16934619	16412868	T	G	0.0115	0.03	0.26	0.918	0.79	0.49	0.11	0.17
rs150807420	16891596	G	C	0.0225	-0.16	0.12	0.169	-0.36	0.22	0.111	0.42
rs7019686	16936307	C	A	0.0335	-0.09	0.09	0.288	0.24	0.15	0.111	0.06
rs1889114	17402272	A	G	0.4645	0.08	0.03	0.0246	-0.1	0.07	0.111	0.02
c9_pos16863746	16873746	T	C	0.0095	0.38	0.17	0.0238	0.47	0.29	0.112	0.79
rs13295654	17053439	T	G	0.3175	0.06	0.03	0.0628	0.1	0.06	0.112	0.55
rs112755903	16915906	G	T	0.039	0.2	0.1	0.0374	0.28	0.18	0.113	0.7
rs7046103	16965579	G	A	0.304	0	0.03	0.899	0.1	0.07	0.113	0.19
rs36020058	16456063	C	CT	0.47	-0.01	0.03	0.745	-0.1	0.06	0.113	0.18
rs381912	17045066	C	G	0.1195	-0.01	0.05	0.908	-0.15	0.09	0.113	0.17
rs12339564	17403132	G	A	0.4615	0.08	0.03	0.0247	-0.1	0.07	0.113	0.02
rs59547297	16868399	CTCTA	C	0.089	-0.28	0.06	6.16e-07	-0.17	0.11	0.114	0.38
rs9657595	17387062	T	A	0.0815	-0.04	0.06	0.472	-0.17	0.11	0.114	0.3
rs416529	17045105	T	A	0.1195	-0.01	0.05	0.903	-0.15	0.09	0.114	0.17
rs4961439	17392921	A	G	0.432	0.08	0.04	0.0338	-0.11	0.07	0.114	0.02
rs7853747	16411463	G	T	0.4045	-0.02	0.03	0.543	-0.1	0.06	0.115	0.23
rs263547	17026929	G	A	0.193	0	0.04	0.944	-0.12	0.07	0.115	0.14
rs374785	16998247	C	T	0.134	-0.04	0.05	0.347	-0.14	0.09	0.116	0.33
rs1057383	16413632	A	T	0.4035	-0.02	0.03	0.557	-0.1	0.06	0.116	0.23
rs4961557	17398404	A	G	0.4305	0.07	0.04	0.0425	-0.11	0.07	0.116	0.03
rs10738475	17364927	A	C	0.073	-0.07	0.06	0.29	-0.17	0.11	0.117	0.42
rs3739489	17394996	C	T	0.0815	-0.04	0.06	0.486	-0.17	0.11	0.117	0.3
rs80102452	17398672	G	T	0.019	-0.15	0.2	0.452	0.54	0.34	0.117	0.08
rs263627	17115403	T	C	0.2925	0.04	0.04	0.234	-0.11	0.07	0.117	0.06
rs2584547	17406022	G	A	0.464	0.08	0.03	0.0251	-0.1	0.07	0.117	0.02
rs10283690	17394136	T	C	0.432	0.08	0.04	0.034	-0.11	0.07	0.117	0.02
rs5896689	16413354	GT	G	0.439	-0.02	0.04	0.674	-0.11	0.07	0.118	0.26
rs7035049	16413779	G	A	0.403	-0.02	0.03	0.543	-0.1	0.06	0.118	0.23
rs9298763	16420174	T	C	0.354	-0.04	0.03	0.219	-0.1	0.06	0.119	0.37
rs78244354	17303045	G	A	0.02	-0.11	0.19	0.584	0.53	0.34	0.119	0.1
rs1442523	17391536	G	A	0.43	0.07	0.04	0.0387	-0.1	0.07	0.119	0.03
rs10116140	17390339	T	C	0.43	0.07	0.04	0.0403	-0.1	0.07	0.119	0.03
rs10116093	17390170	T	C	0.43	0.07	0.04	0.0407	-0.1	0.07	0.119	0.03
rs16935195	16961911	A	G	0.209	0.06	0.04	0.162	0.12	0.07	0.12	0.46
rs113143464	17164273	G	A	0.022	-0.13	0.13	0.361	-0.38	0.24	0.12	0.36
rs77488794	17232487	A	T	0.1	-0.02	0.06	0.793	-0.17	0.11	0.12	0.23
rs151227244	16547052	A	T	0.021	0.05	0.15	0.73	-0.43	0.27	0.12	0.12
rs7041840	17399095	G	T	0.43	0.07	0.04	0.0392	-0.1	0.07	0.12	0.03
rs10123109	17391173	G	A	0.43	0.07	0.04	0.0403	-0.1	0.07	0.12	0.03
rs10810784	17397101	A	T	0.156	0.01	0.05	0.809	-0.14	0.09	0.121	0.15
rs139349672	16807639	G	A	0.007	0.1	0.35	0.787	-0.99	0.64	0.122	0.14
rs34297599	17384288	G	GAA	0.4765	-0.06	0.04	0.117	0.12	0.08	0.122	0.04
rs2780212	17407849	T	C	0.4695	0.07	0.03	0.0329	-0.1	0.07	0.122	0.03
rs4961555	17385348	T	C	0.43	0.07	0.04	0.0391	-0.1	0.07	0.122	0.03
rs113036030	16927144	G	A	0.046	-0.21	0.08	0.0118	0.23	0.14	0.122	0.01
rs12003691	16917715	C	A	0.0085	0.93	0.28	0.00106	-0.81	0.52	0.122	0
rs75712290	16432419	T	A	0.0095	0.13	0.28	0.639	0.86	0.55	0.123	0.24
c9_pos16942808	16952808	C	T	0.01	0.06	0.16	0.708	0.49	0.32	0.123	0.23
rs10962633	16841972	T	C	0.2245	-0.06	0.04	0.0977	-0.11	0.07	0.124	0.54
rs10756879	17397381	T	G	0.0825	-0.04	0.06	0.49	-0.17	0.11	0.124	0.3
rs6475056	16468540	C	T	0.0865	0.03	0.08	0.691	0.23	0.15	0.124	0.24
rs10962744	16941667	C	T	0.007	0.51	0.25	0.0437	-0.75	0.49	0.124	0.02
rs145525077	17230413	C	CT	0.0745	-0.06	0.06	0.359	-0.17	0.11	0.125	0.38
rs117874986	17336598	T	C	0.0135	0.13	0.19	0.494	0.53	0.34	0.125	0.3
rs186903491	16523373	G	A	0.006	-0.41	0.3	0.166	0.89	0.57	0.125	0.04
rs78424415	17227255	T	C	0.074	-0.06	0.06	0.358	-0.17	0.11	0.126	0.38
rs10963067	17367946	C	A	0.0745	-0.06	0.06	0.369	-0.17	0.11	0.126	0.38
rs10962817	17014373	C	A	0.453	-0.05	0.03	0.136	0.09	0.06	0.126	0.04
rs55913845	16883602	C	T	0.0755	-0.26	0.06	5.63e-05	-0.19	0.12	0.127	0.6
rs10962427	16463915	G	C	0.368	-0.04	0.04	0.286	-0.1	0.07	0.127	0.46
rs113593132	16861764	G	A	0.078	-0.29	0.06	2.1e-06	-0.18	0.12	0.127	0.41
c9_pos16857042	16867042	G	A	0.093	-0.28	0.06	5.25e-07	-0.17	0.11	0.127	0.38
rs10810781	17384459	G	A	0.429	0.07	0.04	0.0397	-0.1	0.07	0.127	0.03
rs36057268	17379340	C	T	0.4215	0.07	0.04	0.0403	-0.1	0.07	0.127	0.03
9	17088000	CA	C	0.1145	-0.11	0.08	0.143	-0.21	0.14	0.128	0.54
rs10810649	16870421	G	A	0.0925	0.09	0.05	0.0892	0.16	0.1	0.128	0.53
rs111567891	16870939	A	C	0.09	-0.27	0.06	2.36e-06	-0.17	0.11	0.128	0.42
rs12236166	17317738	T	C	0.0725	-0.05	0.06	0.382	-0.17	0.11	0.128	0.34
rs10114662	17383073	G	C	0.429	0.07	0.04	0.0405	-0.1	0.07	0.128	0.03
rs10810782	17390202	G	A	0.4645	0.08	0.03	0.0277	-0.1	0.07	0.128	0.02
rs404374	17056680	T	A	0.2875	0.06	0.04	0.0882	0.1	0.07	0.129	0.62
rs145222693	17365694	A	G	0.014	0.07	0.18	0.684	0.5	0.33	0.129	0.25
rs16934607	16410409	G	A	0.0105	0.06	0.27	0.814	0.79	0.51	0.129	0.21
rs66658739	16528817	GATCT	G	0.1605	-0.05	0.05	0.33	0.16	0.1	0.129	0.06
rs7038186	17398616	G	T	0.4655	0.08	0.03	0.0266	-0.1	0.07	0.129	0.02
rs7047534	16886487	T	C	0.0885	-0.26	0.06	5.94e-06	-0.17	0.11	0.13	0.47
rs10435766	16972712	G	T	0.305	0	0.03	0.895	0.1	0.07	0.131	0.19
rs1442533	17379146	G	A	0.4585	0.07	0.03	0.0372	-0.1	0.07	0.131	0.03
rs10756869	17342517	G	A	0.4255	0.07	0.04	0.0443	-0.1	0.07	0.131	0.03
rs16934710	16456284	T	C	0.0745	0.04	0.07	0.58	-0.18	0.12	0.132	0.11
rs16934702	16453046	T	C	0.0755	0.04	0.06	0.588	-0.18	0.12	0.132	0.1
rs4961519	17013233	A	C	0.1305	0.1	0.05	0.0367	-0.13	0.09	0.132	0.03
rs10756817	16843384	A	G	0.224	-0.06	0.04	0.111	-0.11	0.07	0.133	0.54
rs10963056	17348426	C	T	0.0675	-0.06	0.06	0.353	-0.17	0.11	0.133	0.38
rs10435765	16972646	G	A	0.306	0.01	0.03	0.85	0.1	0.07	0.133	0.24
rs75182440	16452736	G	A	0.009	0.01	0.28	0.981	0.82	0.54	0.133	0.18
rs7037176	16514375	C	A	0.3365	-0.04	0.04	0.356	0.12	0.08	0.133	0.07
rs117956736	16785878	T	C	0.0135	-0.03	0.22	0.892	0.67	0.44	0.134	0.15
rs2815175	17165698	A	G	0.103	0.03	0.05	0.579	-0.14	0.09	0.134	0.1
rs7019530	16936082	A	G	0.165	-0.09	0.04	0.0396	-0.12	0.08	0.135	0.74
rs71513270	16855628	C	T	0.0055	-0.15	0.3	0.614	-0.75	0.5	0.135	0.3
rs111610771	16851983	TATA	T	0.0895	-0.3	0.06	1.62e-07	-0.16	0.11	0.135	0.26
rs12345267	17386062	C	T	0.4635	0.08	0.03	0.028	-0.1	0.07	0.135	0.02
rs75110373	17230928	T	C	0.122	0.12	0.05	0.0199	-0.14	0.09	0.135	0.01
rs12164282	17312180	G	T	0.072	-0.05	0.06	0.393	-0.17	0.11	0.136	0.34
rs147978983	16441065	TA	T	0.0085	0.15	0.29	0.601	0.88	0.58	0.136	0.26
c9_pos17012978	17022978	C	T	0.043	-0.04	0.08	0.629	0.21	0.14	0.136	0.12
rs58735469	17119081	A	G	0.2845	0.04	0.04	0.295	-0.1	0.07	0.136	0.08
rs56252187	16944006	T	A	0.4835	-0.12	0.03	0.000242	-0.09	0.06	0.137	0.65
rs7024013	16872434	A	T	0.09	-0.25	0.06	8.5e-06	-0.16	0.11	0.137	0.47
rs7862084	16869811	C	A	0.09	-0.28	0.06	6.22e-07	-0.16	0.11	0.137	0.34
rs4497063	16876346	G	A	0.0905	-0.25	0.06	9.8e-06	-0.16	0.11	0.138	0.47
rs79641699	17360296	G	A	0.072	-0.06	0.06	0.354	-0.17	0.11	0.138	0.38
rs7862213	16869905	C	T	0.09	-0.28	0.06	5.98e-07	-0.16	0.11	0.138	0.34
rs112356725	16858120	G	A	0.0085	-0.18	0.25	0.492	0.77	0.51	0.138	0.09
rs75938007	17390878	G	A	0.0195	-0.2	0.13	0.142	-0.38	0.25	0.139	0.52
rs139830397	17277790	G	A	0.0155	0.06	0.17	0.706	0.44	0.29	0.139	0.26
rs1596193	17371690	T	C	0.4265	0.08	0.04	0.0343	-0.1	0.07	0.139	0.03
rs1487498	17014049	C	T	0.1305	0.1	0.05	0.0421	-0.13	0.09	0.139	0.03
rs2029247	17117875	T	C	0.2905	0.04	0.04	0.239	-0.1	0.07	0.14	0.08
rs71476250	16518576	A	T	0.2245	-0.05	0.05	0.3	0.13	0.09	0.14	0.08
rs10124487	17350843	T	C	0.426	0.07	0.04	0.0398	-0.1	0.07	0.14	0.03
rs200578572	16933353	G	A	0.008	0.66	0.2	0.000985	-0.61	0.41	0.14	0.01
rs57898229	16933351	AG	A	0.008	0.66	0.2	0.000986	-0.61	0.41	0.14	0.01
rs35893659	16933023	G	A	0.008	0.64	0.2	0.00126	-0.6	0.4	0.14	0.01
rs4097851	17383698	C	T	0.0825	-0.04	0.06	0.478	-0.16	0.11	0.141	0.34
rs148165812	17401918	CTAA	C	0.1885	0.03	0.04	0.55	-0.12	0.08	0.141	0.09
rs3840727	17333747	C	CAT	0.4265	0.07	0.04	0.0373	-0.1	0.07	0.141	0.03
rs200119813	17357600	CAT	C	0.425	0.07	0.04	0.0416	-0.1	0.07	0.141	0.03
rs1487499	17014026	G	A	0.13	0.1	0.05	0.042	-0.13	0.09	0.141	0.03
rs144418290	16857956	G	A	0.007	-0.19	0.32	0.551	-0.87	0.58	0.142	0.3
rs12006205	16932896	C	T	0.008	0.64	0.2	0.00119	-0.59	0.4	0.142	0.01
rs117638588	17322000	C	T	0.011	-0.19	0.22	0.402	-0.6	0.41	0.143	0.38
rs60234091	16877233	G	A	0.091	-0.25	0.06	9.77e-06	-0.16	0.11	0.144	0.47
rs7037111	17359939	T	C	0.4255	0.07	0.04	0.0382	-0.1	0.07	0.144	0.03
rs10810705	17004418	T	C	0.319	0.09	0.03	0.0129	0.09	0.06	0.145	1
rs60880076	16877259	A	T	0.091	-0.25	0.06	9.83e-06	-0.16	0.11	0.145	0.47
rs10962814	17010201	C	T	0.132	0.09	0.05	0.047	-0.13	0.09	0.145	0.03
rs12238680	17251071	G	A	0.073	-0.06	0.06	0.37	-0.16	0.11	0.147	0.42
rs34615158	16836573	G	A	0.431	-0.05	0.04	0.303	0.12	0.08	0.147	0.06
rs7035522	16880050	C	T	0.0905	-0.25	0.06	1.11e-05	-0.16	0.11	0.148	0.47
rs10962473	16524830	G	C	0.257	-0.06	0.04	0.193	0.12	0.08	0.148	0.04
rs10963082	17401898	C	G	0.1225	0.13	0.05	0.0138	-0.14	0.09	0.148	0.01
c9_pos17004806	17014806	G	A	0.248	0.08	0.04	0.0341	0.1	0.07	0.149	0.8
rs35175200	17403543	ATT	A	0.093	-0.02	0.06	0.781	-0.16	0.11	0.149	0.26
rs114615969	16461402	G	C	0.008	0.03	0.3	0.922	0.85	0.58	0.149	0.21
rs147253486	16455573	G	A	0.009	-0.01	0.28	0.958	0.79	0.54	0.149	0.19
rs2382807	16452659	C	T	0.0765	0.04	0.06	0.548	-0.17	0.12	0.149	0.12
rs7865766	17347872	T	C	0.4255	0.07	0.04	0.0428	-0.1	0.07	0.149	0.03
rs10435763	16885854	G	T	0.089	-0.25	0.06	6.89e-06	-0.16	0.11	0.15	0.47
rs10963085	17404916	A	G	0.078	-0.04	0.06	0.573	-0.16	0.11	0.15	0.34
rs60618682	16852683	A	G	0.0905	-0.29	0.06	2.05e-07	-0.16	0.11	0.15	0.3
rs7864652	16456759	C	T	0.0765	0.03	0.07	0.6	-0.17	0.12	0.15	0.15
rs10810788	17403734	C	G	0.189	0.03	0.04	0.555	-0.12	0.08	0.15	0.09
rs2779772	17147191	A	C	0.1835	0.06	0.04	0.196	-0.12	0.08	0.15	0.04
rs7022060	17361597	G	A	0.4245	0.07	0.04	0.0423	-0.1	0.07	0.15	0.03
rs113712823	16931669	A	G	0.007	0.6	0.22	0.00616	-0.64	0.44	0.15	0.01
rs200349457	17266938	A	G	0.0725	-0.06	0.06	0.347	-0.16	0.11	0.151	0.42
rs79512743	17239045	C	T	0.074	-0.05	0.06	0.388	-0.16	0.11	0.151	0.38
rs16935416	17235156	G	A	0.0745	-0.05	0.06	0.458	-0.16	0.11	0.151	0.38
rs10963063	17355341	C	T	0.4245	0.07	0.04	0.0436	-0.1	0.07	0.151	0.03
rs10756847	16946673	C	T	0.4825	-0.12	0.03	0.000248	-0.09	0.06	0.152	0.65
rs72004590	17273435	ATGTATTAC	A	0.0725	-0.06	0.06	0.342	-0.16	0.11	0.152	0.42
rs2584545	17404776	C	G	0.08	-0.04	0.06	0.512	-0.16	0.11	0.152	0.34
rs67782389	16938335	G	A	0.404	0.01	0.03	0.77	0.09	0.06	0.152	0.23
rs201417633	17119346	ATAATATAT	A	0.259	0	0.04	0.899	-0.1	0.07	0.152	0.21
rs77470745	16455265	G	C	0.009	0	0.28	0.999	0.79	0.54	0.152	0.19
rs7028582	17380986	A	C	0.072	-0.07	0.06	0.296	-0.16	0.11	0.153	0.47
rs443662	17117203	A	G	0.2935	0.04	0.04	0.26	-0.1	0.07	0.153	0.08
rs2151290	17247384	A	G	0.422	0.08	0.04	0.0361	-0.1	0.07	0.153	0.03
rs6475140	17350246	C	T	0.073	-0.06	0.06	0.333	-0.16	0.11	0.154	0.42
rs13290922	17253518	C	T	0.4255	0.07	0.04	0.0392	-0.1	0.07	0.154	0.03
rs147833018	17340476	G	A	0.0145	-0.27	0.19	0.153	-0.51	0.36	0.155	0.56
rs78077756	16441931	C	T	0.0455	0	0.08	0.953	-0.21	0.15	0.155	0.22
rs670058	17292890	A	G	0.4225	0.07	0.04	0.0375	-0.09	0.07	0.155	0.05
rs78896738	17270945	C	CTTTTTTTTTTTT	0.0785	0.09	0.1	0.348	0.27	0.19	0.156	0.4
rs263606	17096753	C	T	0.4955	0.11	0.03	0.000647	0.09	0.06	0.157	0.77
rs58515916	16851342	C	CA	0.116	-0.25	0.06	1.13e-05	-0.15	0.11	0.157	0.42
rs201134930	16469990	C	CTTTTTTTTTTTTT	0.067	0.09	0.1	0.361	0.28	0.19	0.157	0.38
rs7042297	16445034	A	T	0.088	0.04	0.06	0.516	-0.17	0.12	0.157	0.12
rs16935253	17014923	C	T	0.127	0.1	0.05	0.0316	-0.13	0.09	0.157	0.03
rs10962957	17261972	A	T	0.0735	-0.06	0.06	0.333	-0.16	0.11	0.158	0.42
rs7031361	17324645	A	T	0.074	-0.06	0.06	0.353	-0.16	0.11	0.159	0.42
rs66825305	17327310	C	CG	0.073	-0.06	0.06	0.363	-0.16	0.11	0.159	0.42
rs9406667	17272087	T	C	0.148	0.01	0.05	0.906	-0.13	0.09	0.159	0.17
rs263655	17009481	A	G	0.455	-0.05	0.03	0.0954	0.09	0.06	0.159	0.04
rs190848809	17259201	A	G	0.068	-0.06	0.06	0.364	-0.16	0.11	0.16	0.42
rs263653	17010445	G	A	0.454	-0.05	0.03	0.0998	0.08	0.06	0.16	0.05
rs34777955	17096752	TC	T	0.492	0.11	0.03	0.000877	0.09	0.06	0.161	0.77
rs150929911	17268048	C	T	0.0725	-0.06	0.06	0.342	-0.16	0.11	0.161	0.42
rs10962978	17268375	G	A	0.0725	-0.06	0.06	0.342	-0.16	0.11	0.161	0.42
rs620280	17302171	A	G	0.073	-0.06	0.06	0.368	-0.16	0.11	0.161	0.42
rs117309001	16533678	G	A	0.016	-0.14	0.18	0.444	-0.46	0.33	0.161	0.39
9	16870420	C	T	0.0065	-0.26	0.34	0.453	-0.87	0.61	0.161	0.38
rs4409489	17295260	A	C	0.4215	0.07	0.04	0.0384	-0.09	0.07	0.161	0.05
rs1759441	17279838	T	C	0.4215	0.07	0.04	0.0399	-0.09	0.07	0.161	0.05
rs263639	17019835	G	A	0.0175	-0.22	0.16	0.153	-0.41	0.29	0.162	0.57
rs1339550	16854839	C	T	0.0915	-0.28	0.05	7.03e-07	-0.15	0.11	0.162	0.28
rs7047512	16856367	T	C	0.0915	-0.29	0.06	2.26e-07	-0.15	0.11	0.162	0.26
rs78117593	16631262	C	G	0.022	0.08	0.16	0.637	-0.4	0.29	0.162	0.15
rs645117	17293779	G	A	0.4215	0.07	0.04	0.0379	-0.09	0.07	0.162	0.05
rs2779775	17274319	G	T	0.4215	0.07	0.04	0.0543	-0.09	0.07	0.162	0.05
rs2779773	17278584	A	G	0.4215	0.07	0.03	0.0429	-0.09	0.07	0.162	0.04
rs9407783	17149541	G	A	0.4565	0.08	0.03	0.0276	-0.09	0.06	0.162	0.01
rs10962644	16862492	C	T	0.0065	-0.94	0.29	0.00128	0.73	0.51	0.162	0
rs10115784	17345994	C	T	0.073	-0.06	0.06	0.34	-0.16	0.11	0.163	0.42
rs7043361	16658807	T	C	0.283	0.01	0.06	0.836	0.15	0.11	0.163	0.26
rs1759613	17279064	C	T	0.4215	0.07	0.04	0.0431	-0.09	0.07	0.163	0.05
rs77697663	17091951	G	A	0.0275	0.07	0.16	0.68	0.49	0.35	0.164	0.28
rs263636	17022423	G	A	0.1695	-0.01	0.04	0.825	-0.11	0.08	0.164	0.26
rs10962487	16561547	G	T	0.1155	-0.03	0.07	0.602	0.18	0.13	0.164	0.15
9	16995784	AG	A	0.009	-0.24	0.27	0.388	0.74	0.52	0.164	0.09
rs593614	17282681	C	G	0.4215	0.07	0.04	0.0394	-0.09	0.07	0.164	0.05
rs71862472	16948245	CT	C	0.1755	-0.08	0.04	0.0805	-0.12	0.08	0.165	0.65
rs111733097	16861281	G	C	0.0895	-0.29	0.06	4.77e-07	-0.15	0.11	0.165	0.26
rs149428828	17356074	AAAG	A	0.1535	-0.01	0.05	0.898	-0.13	0.09	0.165	0.24
rs10810741	17264074	C	T	0.435	0.09	0.04	0.0147	-0.09	0.07	0.165	0.03
rs147250352	17325168	A	ATTCTTT	0.4215	0.08	0.04	0.0283	-0.09	0.07	0.165	0.03
rs10756860	17309336	C	T	0.419	0.08	0.04	0.0323	-0.09	0.07	0.165	0.03
rs117227858	17321880	C	T	0.0145	0.06	0.18	0.72	0.45	0.32	0.167	0.29
rs595894	17283197	G	A	0.4215	0.07	0.04	0.0414	-0.09	0.07	0.167	0.05
c9_pos16845925	16855925	T	C	0.0995	-0.29	0.06	1.34e-07	-0.15	0.11	0.168	0.26
rs4563978	17327295	T	C	0.4225	0.08	0.04	0.032	-0.09	0.07	0.168	0.03
rs10810739	17246782	T	C	0.4195	0.08	0.04	0.0331	-0.09	0.07	0.168	0.03
rs10962735	16938682	A	G	0.0085	0.58	0.22	0.00914	-0.6	0.44	0.168	0.02
rs10962523	16658828	C	A	0.2425	-0.02	0.06	0.748	0.16	0.12	0.169	0.18
rs1125511	17120454	C	T	0.2925	0.04	0.04	0.245	-0.09	0.07	0.169	0.11
rs57133918	17119529	AT	A	0.2925	0.04	0.04	0.245	-0.09	0.07	0.169	0.11
rs399345	17119924	T	C	0.2925	0.04	0.04	0.245	-0.09	0.07	0.169	0.11
rs139972325	17196919	G	A	0.0065	0.34	0.27	0.224	-0.57	0.41	0.169	0.06
rs10283446	16858671	G	A	0.0245	0.35	0.12	0.00445	0.32	0.23	0.17	0.91
rs670509	17293024	G	A	0.074	-0.05	0.06	0.38	-0.15	0.11	0.17	0.42
c9_pos16838526	16848526	A	C	0.0915	-0.29	0.06	1.43e-07	-0.15	0.11	0.17	0.26
rs10962474	16529554	C	T	0.0825	0.05	0.09	0.555	-0.22	0.16	0.17	0.14
rs12337171	17318647	T	C	0.4205	0.08	0.04	0.0272	-0.09	0.07	0.171	0.03
rs7856233	16454412	G	C	0.381	-0.04	0.03	0.304	-0.09	0.06	0.172	0.46
rs141710884	16878517	G	A	0.01	0.07	0.18	0.677	0.47	0.34	0.172	0.3
rs7044268	16859400	A	T	0.091	-0.29	0.06	2.73e-07	-0.15	0.11	0.172	0.26
rs4272484	17319339	C	T	0.42	0.08	0.04	0.0273	-0.09	0.07	0.172	0.03
rs4272490	17226645	C	A	0.191	0.02	0.04	0.618	-0.11	0.08	0.173	0.15
rs11788893	16622149	A	G	0.1165	-0.05	0.07	0.497	0.18	0.13	0.174	0.12
rs5896732	17120550	T	TA	0.2875	0.05	0.04	0.22	-0.09	0.07	0.174	0.08
rs78845232	16939034	C	G	0.009	0.55	0.22	0.0121	-0.59	0.43	0.174	0.02
rs13288423	16837371	A	G	0.198	-0.07	0.04	0.0979	-0.11	0.08	0.175	0.65
rs113746400	17262388	C	T	0.0175	-0.22	0.14	0.125	-0.37	0.26	0.175	0.61
rs955138	16843999	G	C	0.1895	-0.06	0.04	0.178	-0.11	0.08	0.175	0.58
rs116931907	16875057	C	T	0.01	0.07	0.18	0.691	0.46	0.34	0.175	0.31
9	17034385	AT	A	0.151	-0.08	0.07	0.279	0.19	0.14	0.175	0.08
rs368876180	17188969	CTGAT	C	0.099	0.04	0.05	0.416	-0.13	0.1	0.176	0.13
rs113841625	16606287	A	AAGAG	0.0605	0.13	0.12	0.281	0.29	0.22	0.177	0.52
rs4554574	17379849	G	A	0.0735	-0.06	0.06	0.3	-0.15	0.11	0.177	0.47
rs10963070	17373817	C	G	0.0695	-0.06	0.06	0.376	-0.16	0.11	0.177	0.42
c9_pos16838192	16848192	G	T	0.0895	-0.28	0.06	4.19e-07	-0.15	0.11	0.177	0.3
rs71943317	17234436	A	AC	0.1935	0.02	0.04	0.623	-0.11	0.08	0.177	0.15
rs870271	17280827	C	G	0.4225	0.07	0.04	0.0416	-0.09	0.07	0.177	0.05
rs10810761	17331446	T	A	0.42	0.08	0.04	0.0314	-0.09	0.07	0.177	0.03
rs7470216	17266125	A	T	0.4595	0.08	0.03	0.0283	-0.09	0.06	0.177	0.01
rs185301227	17213523	A	G	0.0175	-0.23	0.14	0.11	-0.36	0.26	0.178	0.66
rs12235811	17297677	A	G	0.068	-0.05	0.06	0.416	-0.16	0.11	0.178	0.38
rs80032034	17160134	C	T	0.1005	0.04	0.05	0.49	-0.13	0.1	0.178	0.13
rs34983435	16917322	G	C	0.1115	-0.1	0.05	0.0557	-0.13	0.09	0.179	0.77
rs112172012	17156249	A	G	0.0175	-0.23	0.14	0.104	-0.36	0.26	0.179	0.66
rs7860831	16476945	T	G	0.25	-0.04	0.04	0.377	-0.11	0.08	0.179	0.43
rs10962995	17280999	A	G	0.069	-0.05	0.06	0.426	-0.15	0.11	0.179	0.42
rs10962680	16905824	T	C	0.293	-0.09	0.04	0.0169	-0.1	0.07	0.18	0.9
rs10962681	16905827	G	T	0.293	-0.09	0.04	0.0169	-0.1	0.07	0.18	0.9
rs76884008	16974014	T	C	0.042	-0.16	0.09	0.0698	-0.23	0.17	0.18	0.72
rs3933182	16979089	A	G	0.3245	-0.13	0.03	0.000134	-0.09	0.06	0.18	0.55
rs2815187	17029106	A	C	0.376	0.12	0.03	0.000467	0.08	0.06	0.18	0.55
rs7860276	16874141	G	A	0.0935	-0.25	0.05	5.41e-06	-0.14	0.11	0.18	0.36
rs5896698	16673401	TA	T	0.2695	0	0.05	0.994	-0.13	0.1	0.18	0.24
rs10962917	17230086	G	A	0.185	0.01	0.04	0.742	-0.11	0.08	0.18	0.18
rs10511631	16961787	A	G	0.0365	0.22	0.08	0.00917	0.22	0.16	0.181	1
rs149345857	16751250	C	T	0.0075	0.38	0.28	0.185	0.71	0.52	0.181	0.58
rs28651010	16606947	G	A	0.0615	0.13	0.12	0.291	0.29	0.22	0.181	0.52
rs56155231	16858738	G	A	0.0895	-0.29	0.06	3.58e-07	-0.15	0.11	0.181	0.26
rs7042237	16457990	G	A	0.014	0.03	0.24	0.908	0.58	0.43	0.181	0.26
rs7864650	17313678	A	T	0.4195	0.08	0.04	0.0323	-0.09	0.07	0.181	0.03
rs78819060	17238939	A	G	0.193	0.02	0.04	0.646	-0.11	0.08	0.183	0.15
rs187694883	17336330	C	T	0.006	0.33	0.28	0.248	-0.58	0.43	0.183	0.08
rs9802710	17263439	T	G	0.4555	0.08	0.03	0.0182	-0.09	0.06	0.183	0.01
rs10733310	16464980	T	G	0.379	-0.05	0.04	0.214	-0.09	0.07	0.184	0.62
rs36118677	16602290	G	A	0.1125	-0.04	0.07	0.565	0.17	0.13	0.184	0.15
rs74520920	17155105	C	G	0.1025	0.05	0.05	0.393	-0.13	0.1	0.184	0.11
rs61039973	17165600	G	GTCC	0.219	0.05	0.04	0.204	-0.1	0.08	0.184	0.09
rs12006360	16887073	C	T	0.0935	0.1	0.05	0.0627	0.14	0.1	0.185	0.72
rs2149161	16464585	A	C	0.377	-0.04	0.04	0.246	-0.09	0.07	0.185	0.54
rs150403229	17031440	C	CT	0.3325	0.14	0.03	5.28e-05	0.09	0.06	0.185	0.46
rs2780213	17406381	C	T	0.08	-0.04	0.06	0.484	-0.15	0.11	0.185	0.38
rs7850919	16456779	T	C	0.01	-0.03	0.27	0.926	0.69	0.51	0.185	0.21
rs7855465	16781771	T	C	0.1625	0.01	0.04	0.872	-0.11	0.08	0.185	0.18
c9_pos16941373	16951373	G	C	0.391	-0.12	0.03	0.00045	-0.08	0.06	0.186	0.55
rs2382803	16454229	G	C	0.381	-0.03	0.03	0.342	-0.08	0.06	0.186	0.46
rs3808782	17340864	C	T	0.069	-0.04	0.06	0.543	-0.15	0.11	0.186	0.38
rs6475121	17240680	T	C	0.1875	0.02	0.04	0.709	-0.11	0.08	0.186	0.15
rs1927620	16453145	A	C	0.381	-0.03	0.03	0.334	-0.08	0.06	0.187	0.46
rs2382802	16454224	A	G	0.381	-0.03	0.03	0.342	-0.08	0.06	0.187	0.46
rs147190673	16454360	G	GT	0.381	-0.03	0.03	0.344	-0.08	0.06	0.187	0.46
rs139577370	17392698	G	T	0.009	-0.16	0.26	0.546	-0.58	0.44	0.187	0.41
rs149685031	17392699	G	T	0.009	-0.16	0.26	0.546	-0.58	0.44	0.187	0.41
rs149641176	17075547	C	G	0.045	-0.12	0.1	0.252	0.25	0.19	0.187	0.08
9	17306144	ATT	A	0.3535	0.04	0.04	0.273	-0.1	0.07	0.187	0.08
rs10756858	17268228	T	C	0.458	0.08	0.03	0.0226	-0.09	0.06	0.187	0.01
c9_pos16982463	16992463	T	A	0.0095	0.04	0.17	0.83	-0.38	0.29	0.188	0.21
rs11560448	17265321	G	A	0.458	0.08	0.03	0.0238	-0.09	0.06	0.188	0.01
rs2149163	16455833	G	C	0.3775	-0.04	0.03	0.294	-0.08	0.06	0.189	0.55
rs6475054	16441429	T	C	0.4405	-0.02	0.03	0.56	-0.08	0.06	0.189	0.37
rs139100330	16442956	A	T	0.0085	0.05	0.28	0.868	0.75	0.56	0.189	0.26
rs75764795	16857335	C	T	0.089	-0.29	0.06	2.79e-07	-0.14	0.11	0.189	0.23
rs4458955	17233530	C	T	0.187	0.02	0.04	0.648	-0.11	0.08	0.189	0.15
rs1685298	17119001	G	A	0.4685	0.08	0.03	0.0193	0.08	0.06	0.19	1
rs12006374	16887167	C	T	0.0935	0.1	0.05	0.0646	0.13	0.1	0.19	0.79
rs986472	16991622	G	A	0.317	-0.06	0.03	0.0668	-0.08	0.06	0.191	0.77
rs2149162	16464560	A	T	0.386	-0.04	0.04	0.269	-0.09	0.07	0.191	0.54
rs74384417	16421086	G	A	0.01	0.15	0.27	0.581	0.68	0.51	0.192	0.36
rs10756857	17263325	T	A	0.456	0.08	0.03	0.023	-0.09	0.06	0.192	0.01
rs140065941	16420449	CAG	C	0.01	0.15	0.27	0.584	0.68	0.51	0.193	0.36
rs79367903	16451868	G	C	0.0085	0.04	0.29	0.897	0.74	0.56	0.193	0.27
rs10511626	16764989	G	T	0.1215	0	0.06	0.981	-0.14	0.11	0.193	0.26
rs11531702	17152209	T	A	0.1025	0.05	0.05	0.392	-0.13	0.1	0.193	0.11
rs263651	17011872	A	G	0.4555	-0.05	0.03	0.109	0.08	0.06	0.193	0.05
rs263569	17030146	A	G	0.1605	-0.02	0.04	0.663	-0.1	0.08	0.194	0.37
c9_pos16845132	16855132	C	T	0.083	-0.28	0.06	2.24e-06	-0.15	0.11	0.194	0.3
rs2815174	17170553	C	G	0.22	0.06	0.04	0.17	-0.1	0.08	0.194	0.07
rs4961517	16976200	C	T	0.215	0.08	0.04	0.0469	0.1	0.08	0.195	0.82
rs13301531	16438433	A	T	0.245	-0.04	0.04	0.355	-0.09	0.07	0.195	0.54
c9_pos16972002	16982002	G	A	0.176	0.05	0.04	0.233	0.11	0.08	0.195	0.5
rs7027849	16873045	A	G	0.0915	-0.01	0.05	0.835	-0.13	0.1	0.195	0.28
rs7863925	16456242	A	G	0.016	0.01	0.22	0.961	0.52	0.4	0.195	0.26
rs11792883	16944034	T	C	0.3115	-0.16	0.03	4.19e-06	-0.08	0.06	0.195	0.23
rs34865223	16548403	G	T	0.0425	0.03	0.13	0.82	-0.3	0.23	0.195	0.21
rs34623397	17266147	C	CT	0.458	0.08	0.03	0.0192	-0.09	0.06	0.195	0.01
rs7044899	16873586	T	C	0.0915	-0.01	0.05	0.863	-0.13	0.1	0.196	0.28
rs2210539	17168867	A	G	0.2215	0.06	0.04	0.18	-0.1	0.08	0.196	0.07
rs2779771	17147361	A	G	0.178	0.06	0.04	0.216	-0.11	0.08	0.196	0.06
rs10810621	16776500	A	C	0.2375	0.04	0.04	0.325	-0.1	0.08	0.198	0.12
rs2774626	17147625	G	C	0.1795	0.05	0.04	0.221	-0.11	0.08	0.198	0.07
rs111417272	16985629	C	T	0.3325	-0.12	0.03	0.000329	-0.08	0.06	0.199	0.55
rs10962755	16944968	C	T	0.311	-0.16	0.03	3.37e-06	-0.08	0.06	0.199	0.23
rs4961516	16971657	A	G	0.431	-0.02	0.03	0.541	0.08	0.06	0.199	0.14
rs263577	17034096	A	G	0.363	0.12	0.03	0.000355	0.08	0.06	0.2	0.55
rs67956400	16888249	GA	G	0.0955	-0.01	0.06	0.816	-0.13	0.1	0.2	0.3
rs12237062	17185337	T	C	0.1015	0.04	0.05	0.422	-0.12	0.09	0.2	0.12
rs141702448	16917134	C	T	0.0295	-0.13	0.1	0.201	-0.24	0.18	0.201	0.59
rs11790330	16943861	G	A	0.3105	-0.16	0.03	3.88e-06	-0.08	0.06	0.201	0.23
rs10962622	16820923	G	C	0.1745	0.21	0.06	0.000503	-0.14	0.11	0.201	0.01
rs6475091	16878382	C	G	0.094	0.11	0.05	0.0459	0.13	0.1	0.202	0.86
rs11792459	16943924	T	G	0.3105	-0.16	0.03	3.88e-06	-0.08	0.06	0.202	0.23
rs4289910	17189785	T	A	0.1	0.04	0.05	0.405	-0.12	0.1	0.202	0.15
rs263652	17011266	T	A	0.4545	-0.05	0.03	0.12	0.08	0.06	0.202	0.05
rs10962426	16463490	T	G	0.3795	-0.04	0.04	0.299	-0.09	0.07	0.203	0.54
rs10756825	16883563	G	C	0.0935	-0.02	0.05	0.682	-0.13	0.1	0.203	0.33
rs56252187	16944006	A	AT	0.3095	-0.16	0.03	4.09e-06	-0.08	0.06	0.203	0.23
rs4422864	16879179	A	T	0.093	0.11	0.05	0.0478	0.13	0.1	0.204	0.86
rs59597299	17094241	CTTAG	C	0.497	-0.11	0.03	0.000999	-0.08	0.06	0.204	0.65
rs7043024	16475660	C	T	0.1405	-0.03	0.05	0.532	-0.12	0.09	0.204	0.38
rs10962988	17269437	G	T	0.456	0.08	0.03	0.0182	-0.08	0.06	0.204	0.02
rs201025922	16949614	CAG	C	0.009	0.39	0.19	0.0473	0.43	0.34	0.205	0.92
rs10962747	16942642	A	T	0.311	-0.16	0.03	3.44e-06	-0.08	0.06	0.205	0.23
rs10962742	16941297	A	G	0.3105	-0.16	0.03	4.65e-06	-0.08	0.06	0.205	0.23
c9_pos16902533	16912533	A	G	0.0985	0.12	0.05	0.0245	0.13	0.1	0.206	0.93
rs35635436	17048901	AT	A	0.27	0.07	0.04	0.0646	0.09	0.07	0.206	0.8
rs7043935	16463157	C	G	0.3815	-0.04	0.03	0.296	-0.08	0.07	0.206	0.6
rs147525890	16918490	T	C	0.019	-0.04	0.13	0.772	-0.31	0.24	0.206	0.32
rs7870682	17204320	T	A	0.166	0.08	0.05	0.1	-0.11	0.08	0.206	0.04
rs7042891	16989246	G	A	0.314	-0.07	0.03	0.0361	-0.08	0.06	0.207	0.88
rs1890643	16880921	C	G	0.0935	0.11	0.05	0.0508	0.13	0.1	0.207	0.86
rs263548	17028235	C	A	0.3625	0.12	0.03	0.000352	0.08	0.06	0.207	0.55
rs137894953	17262190	G	T	0.0125	-0.19	0.21	0.371	-0.49	0.39	0.207	0.5
rs182036145	16418867	A	T	0.0115	0.08	0.25	0.751	0.62	0.49	0.207	0.33
rs186680671	16418868	A	T	0.0115	0.08	0.25	0.751	0.62	0.49	0.207	0.33
rs6475052	16428625	C	T	0.414	-0.01	0.03	0.682	-0.08	0.06	0.207	0.3
rs184706754	16931017	G	A	0.011	0	0.23	0.983	-0.48	0.37	0.207	0.27
rs58474114	17405331	A	G	0.3	0.1	0.04	0.0164	-0.09	0.07	0.207	0.02
rs34161920	17080028	CA	C	0.3765	0.07	0.04	0.0762	0.09	0.07	0.208	0.8
rs115774467	16915859	C	G	0.0315	-0.16	0.1	0.102	-0.23	0.18	0.208	0.73
rs7037540	16692794	T	C	0.0085	-0.13	0.28	0.632	-0.63	0.5	0.208	0.38
rs10733332	16903415	G	T	0.1355	-0.01	0.05	0.783	0.11	0.09	0.208	0.24
rs9407788	17159180	T	A	0.216	0.05	0.04	0.201	-0.1	0.08	0.208	0.09
rs61202585	16882285	G	A	0.0945	0.11	0.05	0.0517	0.13	0.1	0.209	0.86
rs59719786	16880174	G	T	0.0925	0.11	0.05	0.0441	0.13	0.1	0.211	0.86
rs263571	17030663	G	A	0.159	-0.02	0.04	0.655	-0.1	0.08	0.211	0.37
rs201557423	16518573	TATA	T	0.266	-0.05	0.04	0.232	0.1	0.08	0.211	0.09
rs76439812	16880520	C	T	0.0925	0.11	0.05	0.0463	0.13	0.1	0.212	0.86
rs75896813	16726518	G	A	0.012	0.11	0.25	0.667	0.52	0.42	0.212	0.4
rs34876908	16548404	T	TCG	0.0425	0.03	0.13	0.825	-0.29	0.23	0.212	0.23
rs13297677	16777067	T	G	0.236	0.04	0.04	0.292	-0.09	0.07	0.212	0.11
rs76233908	16788336	G	A	0.319	0.05	0.04	0.231	-0.1	0.08	0.212	0.09
rs4961502	16882346	G	A	0.0935	0.11	0.05	0.0516	0.13	0.1	0.213	0.86
rs143773454	16849389	C	G	0.032	-0.07	0.09	0.458	-0.22	0.18	0.213	0.46
rs10733333	16903446	A	G	0.1445	-0.01	0.05	0.895	0.11	0.09	0.213	0.24
rs74645810	16788333	C	T	0.319	0.05	0.04	0.242	-0.1	0.08	0.213	0.09
c9_pos16900025	16910025	T	C	0.0945	0.12	0.05	0.0221	0.13	0.1	0.214	0.93
rs2779768	17171741	G	A	0.218	0.06	0.04	0.167	-0.09	0.08	0.214	0.09
rs10756814	16788327	G	A	0.3195	0.05	0.04	0.241	-0.1	0.08	0.214	0.09
rs10756834	16903652	C	G	0.097	0.13	0.05	0.0146	0.13	0.1	0.215	1
rs7469270	16942496	T	C	0.439	0.09	0.03	0.00414	0.07	0.06	0.215	0.77
rs1890641	16943412	A	T	0.3345	-0.03	0.03	0.333	-0.08	0.06	0.215	0.46
rs76211545	16788328	A	G	0.3195	0.05	0.04	0.241	-0.1	0.08	0.215	0.09
rs36037621	17046034	TA	T	0.006	-0.6	0.37	0.107	-0.69	0.55	0.216	0.89
rs10810651	16874907	G	T	0.093	0.11	0.05	0.0476	0.13	0.1	0.216	0.86
rs2017193	16662535	A	G	0.2425	0.01	0.06	0.852	-0.13	0.11	0.216	0.26
rs74417210	16741082	A	G	0.0375	0.07	0.11	0.545	-0.25	0.2	0.216	0.16
rs10962886	17164433	C	T	0.219	0.05	0.04	0.197	-0.1	0.08	0.216	0.09
rs187752365	16957175	G	T	0.008	-0.08	0.24	0.751	-0.57	0.46	0.217	0.34
rs7021921	16880833	T	C	0.0935	-0.01	0.05	0.859	-0.13	0.1	0.217	0.28
rs2483132	17150911	T	C	0.1055	0.04	0.05	0.459	-0.12	0.09	0.217	0.12
rs2183502	17141204	C	T	0.2225	0.06	0.04	0.147	-0.09	0.08	0.217	0.09
rs71492905	17246885	GT	G	0.415	0.08	0.04	0.024	-0.08	0.07	0.217	0.05
rs10123851	16925108	C	A	0.01	0.7	0.2	0.000434	-0.51	0.41	0.217	0.01
rs10962785	16978102	G	A	0.009	0.4	0.19	0.0409	0.4	0.32	0.218	1
rs263591	17087068	A	G	0.4635	0.07	0.03	0.0375	0.08	0.06	0.218	0.88
rs57645322	16780568	T	TA	0.154	-0.02	0.05	0.706	-0.11	0.09	0.218	0.38
rs2774628	17152143	T	C	0.1035	0.04	0.05	0.416	-0.12	0.09	0.218	0.12
rs147086769	16594353	C	T	0.0055	0.43	0.4	0.288	-0.78	0.63	0.218	0.1
rs77311561	16906019	G	A	0.0945	0.13	0.05	0.0158	0.13	0.1	0.219	1
rs5896723	16918149	C	CT	0.3935	-0.05	0.03	0.121	-0.08	0.06	0.219	0.65
rs62541874	16840005	A	T	0.0925	-0.15	0.06	0.0159	-0.14	0.11	0.22	0.94
rs263592	17087291	T	G	0.464	0.07	0.03	0.0386	0.08	0.06	0.22	0.88
rs7847725	16878495	G	C	0.093	0.11	0.05	0.0421	0.13	0.1	0.22	0.86
rs10733334	16903490	G	T	0.137	-0.01	0.05	0.905	0.11	0.09	0.221	0.24
rs67762885	16781010	A	G	0.1595	0.01	0.04	0.894	-0.1	0.08	0.221	0.22
rs10962451	16490809	C	G	0.0075	0.2	0.27	0.466	-0.62	0.51	0.221	0.16
rs10962431	16471233	G	A	0.013	-0.18	0.23	0.458	0.53	0.43	0.221	0.15
rs10756813	16788308	T	C	0.325	0.05	0.04	0.233	-0.1	0.08	0.221	0.09
rs10756778	16673620	T	C	0.2705	0	0.05	0.96	-0.12	0.1	0.222	0.28
rs10119720	16491461	A	G	0.0055	0.32	0.3	0.291	-0.69	0.57	0.222	0.12
rs10756855	17231465	C	T	0.453	0.09	0.03	0.0123	-0.08	0.07	0.222	0.03
rs16935340	17118007	T	C	0.107	0.04	0.05	0.462	-0.12	0.1	0.223	0.15
rs2815183	17155772	G	C	0.218	0.06	0.04	0.166	-0.09	0.08	0.223	0.09
rs7032158	16904047	G	A	0.096	0.14	0.05	0.0105	0.13	0.1	0.224	0.93
rs35386000	16880946	C	G	0.0925	-0.01	0.05	0.845	-0.12	0.1	0.224	0.33
rs7031867	16856867	A	T	0.0745	-0.01	0.06	0.89	-0.14	0.11	0.224	0.3
rs76422101	17135641	C	G	0.0995	0.06	0.05	0.268	-0.12	0.1	0.224	0.11
rs10756856	17242708	G	C	0.378	0.08	0.04	0.0327	-0.08	0.07	0.224	0.05
rs10756836	16906060	C	A	0.0975	0.13	0.05	0.0135	0.12	0.1	0.225	0.93
rs10810648	16857676	A	G	0.0225	0.37	0.13	0.00383	0.3	0.24	0.225	0.8
rs1487508	16986789	G	A	0.3325	-0.12	0.03	0.000543	-0.08	0.06	0.225	0.55
rs62543486	16616301	G	T	0.0745	0.03	0.07	0.66	-0.15	0.12	0.225	0.2
rs72714999	16415775	C	T	0.1095	-0.03	0.07	0.668	0.16	0.13	0.225	0.2
rs41268967	16437605	C	T	0.065	0.04	0.07	0.608	-0.15	0.12	0.225	0.17
c9_pos17014622	17024622	T	C	0.0335	0.07	0.09	0.409	-0.2	0.16	0.225	0.14
rs10156640	16986039	G	A	0.334	-0.12	0.03	0.000401	-0.08	0.06	0.226	0.55
rs2815184	17156575	A	G	0.224	0.06	0.04	0.139	-0.09	0.07	0.226	0.06
rs373094273	16978052	T	C	0.2145	0.08	0.04	0.0493	0.09	0.08	0.227	0.91
rs10962863	17091001	C	T	0.087	-0.08	0.06	0.206	-0.13	0.11	0.227	0.69
rs71327884	16955307	T	TTTAC	0.447	0.11	0.03	0.000856	0.07	0.06	0.227	0.55
rs150807810	17387945	G	GAA	0.167	0.01	0.05	0.785	-0.11	0.09	0.227	0.24
rs59442437	16877352	C	G	0.4765	-0.04	0.05	0.422	0.12	0.1	0.227	0.15
rs2815176	17163179	C	G	0.2175	0.06	0.04	0.151	-0.09	0.08	0.227	0.09
rs189339063	17189365	C	T	0.0075	-0.31	0.23	0.175	0.51	0.41	0.227	0.08
rs201551585	16900623	C	T	0.008	0.47	0.19	0.0155	0.4	0.33	0.228	0.85
rs4545191	16446091	A	G	0.0125	0.09	0.23	0.715	0.53	0.43	0.228	0.37
rs73414371	17027250	C	T	0.0285	0.06	0.1	0.576	-0.22	0.18	0.228	0.17
rs59717315	16877354	C	CT	0.4765	-0.04	0.05	0.422	0.12	0.1	0.228	0.15
rs117708236	16914549	C	A	0.0125	0.42	0.19	0.0279	0.4	0.33	0.229	0.96
rs7023455	16845903	T	G	0.0355	-0.08	0.09	0.41	-0.21	0.17	0.229	0.5
rs71513275	16882161	T	G	0.0895	-0.02	0.06	0.76	-0.13	0.1	0.229	0.35
rs4961758	16776283	A	T	0.165	0.01	0.05	0.818	-0.1	0.08	0.229	0.24
rs117708405	17169620	A	G	0.0075	-0.31	0.23	0.174	0.51	0.41	0.229	0.08
rs12377846	16786784	A	C	0.037	0.21	0.12	0.0836	-0.26	0.21	0.229	0.05
rs7860428	16932299	A	G	0.133	0.15	0.05	0.00159	0.11	0.09	0.23	0.7
rs145463371	17091389	A	G	0.0865	-0.08	0.06	0.202	-0.13	0.11	0.23	0.69
rs10962759	16948075	A	C	0.4365	0.09	0.03	0.00381	0.07	0.06	0.231	0.77
rs62540625	16460400	T	C	0.0235	0.08	0.14	0.542	-0.3	0.25	0.231	0.18
rs59077570	16866657	CT	C	0.234	-0.09	0.04	0.0181	-0.09	0.07	0.232	1
rs10810714	17087619	C	G	0.463	0.07	0.03	0.0336	0.07	0.06	0.232	1
rs67155971	16952808	CT	C	0.067	-0.05	0.09	0.566	-0.2	0.17	0.232	0.44
rs36021466	16880291	G	T	0.0905	-0.02	0.06	0.787	-0.12	0.1	0.232	0.39
rs74602641	16430010	C	T	0.0215	-0.05	0.19	0.797	0.42	0.35	0.232	0.24
rs2185272	16877339	C	A	0.0925	0.11	0.05	0.047	0.12	0.1	0.233	0.93
rs112952623	16949764	A	AT	0.3925	-0.12	0.03	0.000408	-0.07	0.06	0.233	0.46
rs2815179	17147702	C	A	0.222	0.06	0.04	0.122	-0.09	0.08	0.233	0.09
rs10116995	16924754	A	G	0.0095	0.71	0.2	0.000406	-0.5	0.41	0.233	0.01
rs71513276	16882414	G	A	0.0905	-0.01	0.06	0.791	-0.12	0.1	0.234	0.35
rs7868207	17200695	C	G	0.1005	0.04	0.05	0.406	-0.11	0.1	0.235	0.18
rs10962849	17068280	G	A	0.1025	0.04	0.05	0.5	-0.12	0.1	0.235	0.15
rs10810653	16876643	G	C	0.0925	0.11	0.05	0.0469	0.12	0.1	0.236	0.93
rs10810704	16997811	A	G	0.333	-0.07	0.03	0.0418	-0.07	0.06	0.237	1
9	16944128	TGGTACC	T	0.0195	-0.06	0.13	0.659	-0.29	0.24	0.237	0.4
rs10962848	17065565	A	T	0.1025	0.04	0.05	0.521	-0.12	0.1	0.237	0.15
rs12379104	17372261	T	G	0.414	0.06	0.04	0.087	-0.08	0.07	0.237	0.08
rs12376716	16996456	C	T	0.332	-0.07	0.03	0.0363	-0.07	0.06	0.238	1
rs946543	16959540	G	C	0.4305	0.09	0.03	0.00545	0.07	0.06	0.238	0.77
rs11560447	17199090	G	A	0.1	0.04	0.05	0.422	-0.11	0.1	0.238	0.18
rs12378102	16996457	T	G	0.332	-0.07	0.03	0.0362	-0.07	0.06	0.239	1
rs184131052	16919194	A	C	0.0065	-0.36	0.3	0.232	-0.57	0.48	0.239	0.71
rs59047675	17218425	T	G	0.22	0.07	0.04	0.112	-0.09	0.08	0.239	0.07
rs10120560	16921729	C	T	0.0105	0.69	0.19	0.000349	-0.48	0.41	0.239	0.01
rs6475147	17374797	G	T	0.41	0.06	0.04	0.088	-0.08	0.07	0.24	0.08
rs10962763	16950860	A	C	0.428	0.09	0.03	0.00771	0.07	0.06	0.241	0.77
rs7869097	16719631	T	C	0.011	0.04	0.26	0.875	0.52	0.45	0.241	0.36
rs7865075	16875752	T	G	0.095	0.1	0.05	0.0562	0.12	0.1	0.242	0.86
rs13297923	16953684	A	G	0.4315	0.09	0.03	0.00743	0.07	0.06	0.242	0.77
rs186259130	16914965	C	T	0.0325	-0.15	0.09	0.123	-0.21	0.18	0.242	0.77
rs117439620	16931888	C	G	0.0065	-0.37	0.3	0.22	-0.56	0.48	0.242	0.74
9	16926801	T	A	0.0065	-0.36	0.3	0.228	-0.56	0.48	0.242	0.72
rs10631074	16875759	GCCA	G	0.094	0.11	0.05	0.0455	0.12	0.1	0.243	0.93
rs1832549	16948534	T	G	0.437	0.09	0.03	0.00764	0.07	0.06	0.243	0.77
rs114059050	16914954	C	T	0.0325	-0.15	0.09	0.123	-0.21	0.18	0.243	0.77
rs71513274	16877565	G	A	0.0915	-0.02	0.06	0.78	-0.12	0.1	0.243	0.39
9	16442891	G	T	0.022	-0.01	0.17	0.949	-0.36	0.3	0.243	0.31
rs4592125	17214191	C	T	0.0995	0.05	0.05	0.396	-0.11	0.1	0.243	0.15
rs2779769	17152647	A	G	0.2175	0.06	0.04	0.158	-0.09	0.08	0.243	0.09
rs142030758	17362161	C	A	0.011	-0.17	0.22	0.435	-0.46	0.39	0.244	0.52
rs55664138	17027312	T	C	0.0275	0.06	0.1	0.56	-0.22	0.18	0.244	0.17
rs2815180	17152281	G	C	0.2175	0.06	0.04	0.152	-0.09	0.08	0.244	0.09
rs7043298	16651521	C	T	0.3135	-0.05	0.04	0.318	0.1	0.08	0.244	0.09
rs4500176	16876586	T	G	0.094	0.11	0.05	0.0454	0.12	0.1	0.245	0.93
rs10810696	16957138	G	A	0.4295	0.09	0.03	0.00608	0.07	0.06	0.245	0.77
rs147924087	16914711	C	G	0.032	-0.15	0.09	0.114	-0.21	0.18	0.245	0.77
rs7862706	17209878	T	G	0.2135	0.06	0.04	0.145	-0.09	0.08	0.245	0.09
rs79687628	16889330	C	A	0.094	0.11	0.05	0.051	0.12	0.1	0.246	0.93
rs1970389	16942337	G	A	0.4385	0.09	0.03	0.00719	0.07	0.06	0.246	0.77
rs34622231	16426323	C	CT	0.2975	-0.04	0.04	0.274	-0.09	0.08	0.246	0.58
rs191011639	17405855	C	G	0.009	0.15	0.23	0.505	-0.47	0.4	0.246	0.18
9	17003495	C	T	0.007	0.18	0.24	0.46	-0.5	0.43	0.246	0.17
rs112963605	17254005	G	T	0.0385	0.08	0.11	0.502	-0.23	0.2	0.246	0.17
rs67639432	17302087	TAC	T	0.3315	0.05	0.04	0.209	-0.08	0.07	0.246	0.11
9	17134120	G	A	0.0075	-0.32	0.22	0.163	0.49	0.41	0.246	0.08
rs17739929	16628828	T	C	0.0905	0.01	0.06	0.916	-0.12	0.1	0.247	0.26
rs10962908	17214938	A	T	0.0995	0.04	0.05	0.41	-0.11	0.1	0.247	0.18
rs12236896	17216246	A	T	0.0995	0.05	0.05	0.394	-0.11	0.1	0.247	0.15
rs113791705	16909239	C	G	0.0935	0.13	0.05	0.0225	0.12	0.1	0.248	0.93
rs71513271	16870472	A	G	0.0965	0	0.05	0.992	-0.12	0.1	0.248	0.28
rs77878183	16889646	A	C	0.0945	0.11	0.05	0.0486	0.12	0.1	0.249	0.93
rs10121817	16870104	G	A	0.091	0.1	0.06	0.0685	0.12	0.1	0.249	0.86
rs74305154	16889787	A	G	0.095	0.11	0.05	0.0483	0.12	0.1	0.25	0.93
rs376112656	16905780	C	T	0.0325	-0.16	0.09	0.0811	-0.2	0.17	0.25	0.84
rs10125606	16918076	T	G	0.0085	0.92	0.23	9.98e-05	-0.55	0.48	0.25	0.01
rs77719642	16904903	C	T	0.0325	-0.16	0.09	0.0857	-0.2	0.17	0.251	0.84
rs5896716	16883801	TAA	T	0.0895	-0.02	0.06	0.765	-0.12	0.1	0.251	0.39
rs4961722	16529174	T	C	0.343	-0.04	0.04	0.302	0.09	0.07	0.251	0.11
rs6475090	16878170	C	T	0.119	0.13	0.05	0.0117	0.12	0.1	0.252	0.93
rs7865933	16951205	C	A	0.3935	-0.11	0.03	0.000526	-0.07	0.06	0.252	0.55
rs7019105	16610907	T	C	0.0675	0.09	0.11	0.465	0.24	0.21	0.252	0.53
rs76389813	16444753	T	C	0.0095	0.14	0.27	0.621	0.63	0.54	0.252	0.42
rs147018454	17210099	A	C	0.0075	-0.13	0.27	0.633	0.61	0.53	0.252	0.21
rs7039814	17203776	T	C	0.2145	0.06	0.04	0.131	-0.09	0.08	0.252	0.09
rs1586443	17111389	T	G	0.01	0.45	0.27	0.0979	-0.59	0.51	0.252	0.07
rs7864431	16875365	T	C	0.096	0.12	0.05	0.0336	0.12	0.1	0.253	1
rs10709232	17017628	GA	G	0.3175	0.07	0.03	0.0325	0.08	0.07	0.253	0.9
rs1927635	16461905	T	C	0.339	-0.04	0.04	0.227	-0.08	0.07	0.253	0.62
rs35483590	16893883	A	C	0.0955	-0.01	0.05	0.908	-0.12	0.1	0.253	0.33
rs7864554	16787477	G	C	0.1545	0.01	0.04	0.875	-0.1	0.08	0.253	0.22
rs1487502	17006899	G	A	0.3575	0.12	0.03	0.000446	0.07	0.06	0.254	0.46
rs10706941	16875283	C	CG	0.097	0.11	0.05	0.0475	0.12	0.1	0.255	0.93
rs141304021	16907425	C	T	0.0325	-0.17	0.09	0.0686	-0.19	0.17	0.255	0.92
rs12683784	16884679	A	G	0.0925	0.1	0.06	0.0644	0.12	0.1	0.255	0.86
rs112106468	17308889	AT	A	0.109	-0.01	0.05	0.804	-0.11	0.1	0.255	0.37
rs10810765	17341670	A	G	0.402	0.07	0.04	0.0685	-0.08	0.07	0.255	0.06
rs144050346	17264935	G	T	0.428	0.08	0.03	0.0259	-0.08	0.07	0.255	0.04
rs4568695	16822799	T	C	0.2155	0.19	0.05	0.000284	-0.11	0.09	0.255	0
rs34490323	16953117	G	C	0.434	0.09	0.03	0.00524	0.07	0.06	0.256	0.77
rs139840055	17264966	G	C	0.428	0.08	0.03	0.026	-0.08	0.07	0.256	0.04
rs13302481	16954002	C	T	0.4315	0.08	0.03	0.0101	0.07	0.06	0.257	0.88
rs1948106	17067207	T	C	0.4715	0.06	0.03	0.0529	0.07	0.06	0.257	0.88
rs1948107	17067233	C	T	0.4715	0.06	0.03	0.0529	0.07	0.06	0.257	0.88
rs4961725	16599255	C	T	0.0635	0.07	0.12	0.538	0.24	0.21	0.257	0.48
rs201286020	16961299	T	TTTTTGA	0.0205	-0.06	0.13	0.656	-0.29	0.25	0.257	0.41
rs34575896	16413187	AT	A	0.327	-0.03	0.04	0.408	-0.08	0.07	0.258	0.54
rs12683587	16908663	A	G	0.0935	0.13	0.05	0.0195	0.12	0.1	0.259	0.93
rs79129468	16552375	C	G	0.017	-0.16	0.18	0.384	-0.37	0.33	0.259	0.58
rs146011856	16964416	G	C	0.0195	-0.07	0.14	0.62	-0.3	0.27	0.259	0.45
rs4961559	17400701	G	T	0.2965	0.1	0.04	0.0156	-0.08	0.07	0.259	0.03
rs13295308	16891877	C	A	0.092	-0.01	0.05	0.793	-0.12	0.1	0.26	0.33
rs7862811	17209927	T	C	0.2125	0.06	0.04	0.171	-0.09	0.08	0.26	0.09
rs10962799	16989643	G	A	0.013	-0.22	0.14	0.139	0.32	0.28	0.26	0.08
rs4306000	16876176	A	G	0.0955	0.1	0.05	0.0573	0.11	0.1	0.261	0.93
rs116498623	16917013	G	A	0.0305	-0.13	0.1	0.181	-0.21	0.18	0.261	0.7
rs28501274	16605471	A	G	0.066	0.12	0.12	0.322	0.23	0.21	0.261	0.65
rs406268	16997535	C	T	0.073	-0.05	0.06	0.435	0.13	0.11	0.261	0.15
c9_pos16926061	16936061	T	C	0.1295	-0.07	0.05	0.127	-0.1	0.09	0.262	0.77
rs1416744	16954534	C	T	0.067	0.08	0.06	0.216	0.14	0.12	0.263	0.65
rs66504422	16949567	TTTAA	T	0.393	-0.11	0.03	0.000644	-0.07	0.06	0.263	0.55
rs7868212	16881914	G	A	0.0915	-0.02	0.06	0.717	-0.11	0.1	0.263	0.44
rs10756828	16892590	T	A	0.092	-0.01	0.05	0.815	-0.11	0.1	0.263	0.37
rs7048983	17212779	C	G	0.2135	0.06	0.04	0.123	-0.09	0.08	0.263	0.09
rs140957588	17344148	G	GTTTAT	0.4085	0.06	0.04	0.0815	-0.08	0.07	0.263	0.08
rs60934397	16951185	CT	C	0.394	-0.11	0.03	0.000483	-0.07	0.06	0.264	0.55
rs143184847	17291980	A	G	0.0135	-0.52	0.15	0.000917	-0.32	0.28	0.264	0.53
rs117561687	16518301	G	A	0.0085	-0.16	0.28	0.582	-0.59	0.52	0.264	0.47
rs10544302	16876382	CCTG	C	0.0915	-0.01	0.06	0.795	-0.11	0.1	0.264	0.39
rs78886836	16890618	C	A	0.094	0.11	0.05	0.0552	0.11	0.1	0.265	1
rs138802183	16878192	A	G	0.0275	-0.12	0.1	0.241	-0.22	0.19	0.265	0.64
rs139880740	17377518	G	T	0.0135	-0.18	0.2	0.372	-0.41	0.36	0.265	0.58
rs150835757	16537534	TA	T	0.04	-0.01	0.13	0.958	-0.26	0.23	0.265	0.34
rs12006368	16908010	T	C	0.0935	0.13	0.05	0.0192	0.12	0.1	0.266	0.93
rs10733331	16903324	C	A	0.0965	0.13	0.05	0.0197	0.11	0.1	0.266	0.86
rs79538366	16628019	T	G	0.049	0.16	0.13	0.233	0.26	0.24	0.266	0.71
rs35066453	16848716	A	G	0.075	-0.02	0.06	0.793	-0.13	0.11	0.266	0.38
rs263561	17078922	C	A	0.476	0.07	0.03	0.0321	0.07	0.06	0.267	1
rs143502341	17258457	G	A	0.008	-0.26	0.3	0.38	-0.6	0.54	0.267	0.58
rs75631334	16531011	G	A	0.0435	-0.02	0.12	0.851	-0.25	0.23	0.267	0.38
rs142121707	16485123	C	CACAG	0.185	-0.04	0.05	0.438	-0.1	0.09	0.268	0.56
9	17058492	C	CA	0.1715	0.06	0.05	0.257	-0.1	0.09	0.268	0.12
rs111859644	16987149	G	A	0.013	-0.05	0.16	0.747	-0.33	0.29	0.269	0.4
rs13300672	16962945	T	A	0.217	0.07	0.04	0.0829	0.08	0.08	0.27	0.91
rs141131668	16892899	AG	A	0.012	0.44	0.17	0.00792	0.33	0.3	0.27	0.75
9	17295115	C	T	0.0075	-0.24	0.28	0.413	-0.54	0.49	0.27	0.6
rs7868424	16876106	G	C	0.0915	-0.01	0.06	0.794	-0.11	0.1	0.271	0.39
rs7026798	16427378	T	C	0.4315	-0.02	0.03	0.583	-0.07	0.06	0.272	0.46
rs10962589	16783380	G	A	0.157	0	0.04	0.985	-0.09	0.08	0.272	0.31
rs11366076	17237272	TA	T	0.1795	0.02	0.04	0.623	-0.09	0.08	0.272	0.22
rs111365639	16993959	C	CT	0.0085	0.34	0.29	0.241	-0.57	0.51	0.272	0.12
rs149745671	17254734	A	ATTG	0.4085	0.06	0.04	0.105	-0.07	0.07	0.272	0.11
rs10962816	17013975	T	G	0.33	0.08	0.03	0.0249	0.07	0.06	0.273	0.88
rs10738461	16891619	C	G	0.0925	-0.01	0.06	0.824	-0.11	0.1	0.273	0.39
rs10962475	16530104	G	A	0.044	-0.02	0.12	0.87	-0.25	0.23	0.274	0.38
rs12237370	16952580	C	T	0.0075	0.09	0.22	0.671	-0.42	0.38	0.274	0.25
rs12237369	16952575	C	G	0.0075	0.09	0.22	0.671	-0.42	0.38	0.274	0.25
rs1930592	17198428	G	A	0.162	0.06	0.05	0.189	-0.09	0.08	0.274	0.11
rs35443384	17293537	G	A	0.061	0.08	0.08	0.375	0.17	0.16	0.275	0.61
rs181448078	17032990	C	A	0.0055	-0.08	0.29	0.784	-0.54	0.49	0.275	0.42
rs7023752	16518459	A	T	0.322	-0.04	0.04	0.262	0.07	0.07	0.275	0.17
rs34601815	17049208	C	A	0.289	0.06	0.03	0.117	0.07	0.07	0.276	0.9
rs4961429	16956581	C	G	0.43	0.09	0.03	0.00467	0.07	0.06	0.276	0.77
rs71504840	17165660	A	G	0.013	-0.2	0.18	0.286	-0.38	0.35	0.276	0.65
rs112861883	16802788	G	A	0.0065	0.74	0.27	0.00683	0.49	0.45	0.276	0.63
rs34027815	16893093	TA	T	0.0915	-0.01	0.06	0.792	-0.11	0.1	0.276	0.39
rs943738	16519377	G	A	0.322	-0.04	0.04	0.259	0.07	0.07	0.276	0.17
rs149921763	17190460	G	C	0.0065	-0.31	0.24	0.199	0.51	0.46	0.276	0.11
rs4961427	16902529	C	T	0.096	0.12	0.05	0.022	0.11	0.1	0.277	0.93
rs111644895	17208077	C	G	0.02	-0.19	0.14	0.186	-0.3	0.27	0.277	0.72
rs5896720	16890387	AT	A	0.096	-0.03	0.06	0.645	-0.11	0.1	0.277	0.49
rs12684800	16893054	A	G	0.0915	-0.01	0.06	0.793	-0.11	0.1	0.277	0.39
rs10962591	16786281	A	G	0.161	0.01	0.04	0.842	-0.09	0.08	0.277	0.26
rs10119699	16920870	C	T	0.01	0.72	0.2	0.000329	-0.45	0.41	0.277	0.01
rs139770745	16778537	G	A	0.0075	-0.31	0.31	0.32	-0.55	0.51	0.278	0.69
rs72713810	16836723	A	T	0.1245	-0.23	0.06	0.0001	-0.12	0.11	0.278	0.38
rs62558294	17222525	G	A	0.024	0.01	0.12	0.919	0.24	0.22	0.278	0.36
rs76653511	17162581	T	C	0.015	0.05	0.15	0.758	-0.29	0.27	0.278	0.27
rs6475114	17196203	A	G	0.1615	0.05	0.05	0.237	-0.09	0.08	0.278	0.14
rs10756827	16892201	A	T	0.0975	0.12	0.05	0.0345	0.11	0.1	0.279	0.93
rs10810679	16928466	G	C	0.406	0.05	0.03	0.131	0.07	0.06	0.279	0.77
rs6475115	17196533	T	A	0.1615	0.05	0.05	0.235	-0.09	0.08	0.279	0.14
rs7033974	17249636	T	C	0.4065	0.06	0.04	0.0789	-0.07	0.07	0.279	0.11
rs12236820	17249540	T	G	0.4065	0.06	0.04	0.0789	-0.07	0.07	0.279	0.11
rs4565551	16916117	C	T	0.097	0.13	0.06	0.0234	0.12	0.11	0.28	0.94
rs72717037	16493197	T	C	0.0255	-0.01	0.18	0.945	0.36	0.33	0.28	0.32
rs10756757	16519926	C	T	0.325	-0.04	0.04	0.283	0.07	0.07	0.28	0.17
rs56825627	17203057	TG	T	0.2125	0.06	0.04	0.131	-0.08	0.08	0.28	0.12
rs1576957	17208500	G	A	0.2105	0.06	0.04	0.163	-0.08	0.08	0.28	0.12
rs9406666	17272037	T	C	0.408	0.06	0.04	0.0983	-0.07	0.07	0.28	0.11
rs13289920	16788148	T	G	0.1635	-0.12	0.06	0.0668	0.13	0.12	0.28	0.06
rs263585	17041557	A	G	0.088	0.13	0.06	0.0173	0.11	0.1	0.281	0.86
rs146783359	16917720	C	T	0.0195	-0.08	0.13	0.527	-0.26	0.24	0.281	0.51
rs13300696	16892517	G	A	0.093	-0.01	0.05	0.849	-0.11	0.1	0.281	0.37
rs55967157	17069329	G	A	0.1035	0.04	0.05	0.47	-0.11	0.1	0.281	0.18
rs7046933	17254620	A	T	0.412	0.06	0.04	0.103	-0.07	0.07	0.281	0.11
rs10962832	17048990	A	T	0.1435	0.03	0.05	0.586	-0.09	0.09	0.282	0.24
rs10963071	17376453	A	T	0.408	0.07	0.04	0.0539	-0.07	0.07	0.282	0.08
rs117090341	17260496	T	G	0.0145	0	0.17	0.993	0.32	0.3	0.283	0.35
rs10810624	16783192	A	T	0.158	0	0.04	0.996	-0.09	0.08	0.283	0.31
9	16414916	GTT	G	0.128	0.06	0.06	0.367	-0.12	0.11	0.283	0.15
rs1888206	16735406	A	C	0.3445	0.07	0.05	0.166	-0.1	0.09	0.284	0.1
rs12351550	16660960	G	T	0.0485	0.16	0.12	0.169	0.24	0.23	0.285	0.76
rs76945222	17098123	C	A	0.0595	-0.05	0.07	0.528	0.14	0.13	0.285	0.2
rs67435368	16964830	C	T	0.224	0.06	0.04	0.114	0.08	0.07	0.286	0.8
rs10810627	16786071	A	C	0.156	0	0.04	0.933	-0.09	0.08	0.286	0.31
rs146215188	17023787	C	T	0.0225	0.04	0.11	0.712	-0.22	0.2	0.286	0.25
rs117272243	17094910	G	A	0.0595	-0.05	0.07	0.534	0.14	0.13	0.286	0.2
rs12003380	17135434	G	C	0.446	0.05	0.03	0.148	0.07	0.07	0.287	0.79
rs117454411	16606474	G	C	0.0555	0.11	0.12	0.351	0.24	0.22	0.287	0.6
rs4961537	17317041	G	T	0.145	-0.02	0.05	0.637	-0.09	0.09	0.287	0.5
rs943737	16519203	T	C	0.324	-0.04	0.04	0.229	0.07	0.07	0.287	0.17
rs1948108	17067330	G	A	0.4725	0.06	0.03	0.0451	0.06	0.06	0.289	1
rs13288887	17043412	T	A	0.2815	0.08	0.04	0.025	0.07	0.07	0.289	0.9
rs34703320	17268249	A	G	0.0135	-0.19	0.18	0.305	-0.36	0.34	0.289	0.66
rs7035386	17246443	G	T	0.1405	-0.02	0.05	0.685	-0.09	0.09	0.289	0.5
rs12005952	16430783	C	A	0.1685	0.07	0.05	0.129	-0.09	0.08	0.289	0.09
rs263567	17073824	A	C	0.47	0.06	0.03	0.0504	0.06	0.06	0.29	1
rs148764024	16864354	G	A	0.0255	-0.09	0.11	0.417	-0.21	0.2	0.29	0.6
rs11334666	17043986	GT	G	0.3405	0.13	0.04	0.000462	0.07	0.07	0.29	0.46
rs4961755	16769812	G	C	0.1695	0	0.05	0.956	-0.09	0.09	0.29	0.38
rs7019016	16610895	G	C	0.0635	0.07	0.12	0.56	0.22	0.21	0.291	0.54
rs4388546	16890849	A	T	0.0925	-0.02	0.06	0.72	-0.11	0.1	0.291	0.44
rs6475139	17346914	T	C	0.4095	0.06	0.04	0.0805	-0.07	0.07	0.291	0.11
rs10810780	17381799	G	A	0.2965	0.1	0.04	0.0165	-0.08	0.07	0.291	0.03
rs12349018	16920912	T	A	0.01	0.71	0.19	0.00029	-0.43	0.41	0.291	0.01
rs10634599	16875986	TCTCA	T	0.0945	0.11	0.05	0.0437	0.11	0.1	0.292	1
9	17119191	ATT	A	0.384	-0.06	0.04	0.111	-0.08	0.07	0.292	0.8
rs74343556	16739962	C	T	0.011	-0.01	0.25	0.97	0.42	0.4	0.292	0.36
rs10810736	17134061	C	G	0.028	0	0.12	0.996	0.23	0.22	0.292	0.36
rs7045030	16519886	T	C	0.325	-0.04	0.04	0.276	0.07	0.07	0.292	0.17
rs10125014	16613238	T	A	0.0585	0.06	0.12	0.596	0.23	0.22	0.293	0.5
rs10962939	17247143	T	C	0.142	-0.02	0.05	0.704	-0.09	0.09	0.293	0.5
rs10756774	16658174	T	C	0.055	0.06	0.12	0.625	0.24	0.23	0.293	0.49
9	16539603	G	GGA	0.0335	-0.04	0.14	0.76	-0.27	0.26	0.293	0.44
rs36084473	16847601	T	C	0.0735	-0.02	0.06	0.753	-0.12	0.11	0.293	0.42
rs10962490	16570116	T	C	0.0565	0.01	0.11	0.953	-0.21	0.2	0.293	0.34
rs7873708	17349531	T	A	0.4095	0.06	0.04	0.0806	-0.07	0.07	0.293	0.11
rs71327892	17052526	CA	C	0.434	0.08	0.03	0.0277	0.07	0.06	0.294	0.88
rs61216022	16424721	T	C	0.013	0.13	0.22	0.573	0.44	0.42	0.294	0.51
rs263598	17091148	C	G	0.3065	0.05	0.04	0.151	-0.07	0.07	0.294	0.14
rs10598074	17355890	G	GTC	0.4085	0.06	0.04	0.0755	-0.07	0.07	0.294	0.11
rs10756876	17364832	T	G	0.409	0.06	0.04	0.0765	-0.07	0.07	0.294	0.11
rs7864919	17347258	G	A	0.4095	0.06	0.04	0.081	-0.07	0.07	0.294	0.11
rs34864883	17050007	C	T	0.255	0.06	0.04	0.0927	0.07	0.07	0.295	0.9
rs10962767	16958463	A	C	0.431	0.09	0.03	0.00435	0.06	0.06	0.295	0.65
rs10810740	17252284	G	T	0.4045	0.06	0.04	0.07	-0.07	0.07	0.295	0.11
rs4961435	17357597	A	C	0.407	0.06	0.04	0.0747	-0.07	0.07	0.295	0.11
rs7864270	17359662	A	G	0.409	0.06	0.04	0.0774	-0.07	0.07	0.295	0.11
rs10119682	16920619	G	A	0.01	0.71	0.19	0.000289	-0.43	0.41	0.295	0.01
rs2815194	17066061	T	C	0.47	0.06	0.03	0.0465	0.06	0.06	0.296	1
rs428654	17066816	G	A	0.47	0.06	0.03	0.0466	0.06	0.06	0.296	1
rs503467	17067069	G	A	0.47	0.06	0.03	0.0468	0.06	0.06	0.296	1
rs500581	17067110	G	A	0.47	0.06	0.03	0.0468	0.06	0.06	0.296	1
rs7856702	16785920	C	G	0.1555	0	0.04	0.958	-0.09	0.08	0.296	0.31
9	16934918	G	GC	0.0065	-0.1	0.23	0.67	0.4	0.38	0.296	0.26
9	16698320	TA	TAA	0.152	0.07	0.06	0.223	-0.12	0.11	0.296	0.13
rs10756878	17380998	A	T	0.398	0.07	0.04	0.0554	-0.07	0.07	0.296	0.08
rs10810663	16907149	A	G	0.0345	-0.16	0.09	0.0751	-0.18	0.17	0.297	0.92
rs1930641	17316541	G	T	0.145	-0.02	0.05	0.626	-0.09	0.09	0.297	0.5
rs399430	17065442	A	G	0.47	0.06	0.03	0.0463	0.06	0.06	0.298	1
rs426761	17065817	T	C	0.47	0.06	0.03	0.0463	0.06	0.06	0.298	1
rs448576	17068159	A	G	0.4705	0.06	0.03	0.0473	0.06	0.06	0.298	1
rs369822	17068803	A	G	0.4705	0.06	0.03	0.0476	0.06	0.06	0.298	1
rs2492868	17069878	C	T	0.4695	0.06	0.03	0.0526	0.06	0.06	0.298	1
rs144498137	16907041	C	T	0.0325	-0.16	0.09	0.0792	-0.18	0.17	0.298	0.92
rs200502303	16907035	G	GAT	0.0325	-0.16	0.09	0.0799	-0.18	0.17	0.298	0.92
rs75703669	16751670	G	A	0.4695	0.03	0.05	0.582	0.1	0.09	0.298	0.5
rs10962904	17209945	C	A	0.2055	0.06	0.04	0.149	-0.08	0.08	0.298	0.12
rs412190	17067933	T	G	0.4705	0.06	0.03	0.0473	0.06	0.06	0.299	1
rs1725365	17068553	G	A	0.4705	0.06	0.03	0.0473	0.06	0.06	0.299	1
rs453801	17067519	T	A	0.4705	0.06	0.03	0.0473	0.06	0.06	0.299	1
rs400582	17067851	G	A	0.4705	0.06	0.03	0.0474	0.06	0.06	0.299	1
rs2481553	17066507	T	C	0.4705	0.06	0.03	0.0478	0.06	0.06	0.299	1
rs387903	17066568	T	C	0.4705	0.06	0.03	0.0482	0.06	0.06	0.299	1
rs2774632	17066471	G	C	0.4705	0.06	0.03	0.0491	0.06	0.06	0.299	1
rs2481552	17069699	T	C	0.47	0.06	0.03	0.0525	0.06	0.06	0.299	1
rs263558	17127919	T	C	0.4685	0.07	0.03	0.0279	0.06	0.06	0.299	0.88
rs448034	16998460	G	A	0.3585	-0.02	0.03	0.605	-0.06	0.06	0.299	0.55
rs10962482	16549836	T	C	0.048	0	0.12	0.99	-0.23	0.22	0.299	0.36
rs448271	17064276	A	G	0.47	0.06	0.03	0.0462	0.06	0.06	0.3	1
rs417959	17064245	T	C	0.47	0.06	0.03	0.0462	0.06	0.06	0.3	1
rs378128	17068412	G	A	0.4705	0.06	0.03	0.0473	0.06	0.06	0.3	1
rs12552675	16903240	C	T	0.092	-0.02	0.06	0.733	-0.11	0.1	0.3	0.44
rs10481508	16849720	T	C	0.0755	-0.01	0.06	0.829	-0.12	0.11	0.3	0.38
rs11444289	17273175	G	GA	0.4085	0.07	0.04	0.0674	-0.07	0.07	0.3	0.08
rs436873	17068501	A	G	0.4705	0.06	0.03	0.0469	0.06	0.06	0.301	1
rs151259112	16923671	G	A	0.013	-0.49	0.21	0.0218	-0.44	0.42	0.301	0.92
rs263559	17128036	A	G	0.4665	0.07	0.03	0.0268	0.06	0.06	0.301	0.88
rs4424358	17295223	T	C	0.404	0.07	0.04	0.0673	-0.07	0.07	0.301	0.08
rs10756775	16658364	G	A	0.055	0.06	0.12	0.606	0.24	0.23	0.302	0.49
rs145931335	17046063	A	G	0.0145	-0.06	0.19	0.739	-0.33	0.32	0.302	0.47
rs7038064	17338316	C	T	0.409	0.06	0.04	0.0699	-0.07	0.07	0.302	0.11
rs7018705	17267371	C	G	0.407	0.06	0.04	0.0843	-0.07	0.07	0.302	0.11
rs10962982	17268584	T	C	0.407	0.06	0.04	0.0854	-0.07	0.07	0.302	0.11
rs442696	17064226	T	A	0.4705	0.06	0.03	0.0468	0.06	0.06	0.303	1
rs147853695	16907385	A	G	0.0935	0.13	0.05	0.0157	0.11	0.1	0.303	0.86
rs13287985	16960741	G	A	0.43	0.09	0.03	0.00496	0.06	0.06	0.303	0.65
rs71513279	16894688	C	T	0.092	-0.01	0.06	0.798	-0.11	0.1	0.303	0.39
rs10738474	17336492	A	G	0.409	0.06	0.04	0.0697	-0.07	0.07	0.303	0.11
rs6475137	17338162	A	T	0.409	0.06	0.04	0.0702	-0.07	0.07	0.303	0.11
rs72717034	16492911	T	C	0.056	0.05	0.1	0.653	0.19	0.18	0.304	0.5
rs34919930	16895222	G	A	0.0915	-0.01	0.06	0.842	-0.11	0.1	0.304	0.39
rs12683372	16900930	C	T	0.0965	0.12	0.05	0.0255	0.11	0.1	0.305	0.93
rs12683371	16900927	C	T	0.0965	0.12	0.05	0.0255	0.11	0.1	0.305	0.93
rs400885	17050875	C	T	0.4695	-0.05	0.03	0.144	-0.06	0.06	0.305	0.88
rs201349364	17232482	T	TGTTAA	0.094	-0.05	0.06	0.486	-0.12	0.12	0.305	0.6
rs12001003	16611838	C	G	0.0595	0.08	0.12	0.523	0.22	0.21	0.305	0.56
rs1339549	16864572	T	A	0.071	-0.04	0.06	0.568	-0.12	0.11	0.306	0.52
rs10962491	16570142	A	G	0.0735	0.01	0.1	0.927	-0.18	0.18	0.306	0.36
rs35445816	16761077	CA	C	0.3705	0.04	0.04	0.314	-0.07	0.07	0.306	0.17
rs366565	17063703	T	C	0.465	0.06	0.03	0.0534	0.06	0.06	0.307	1
rs2492870	17058576	T	C	0.465	0.06	0.03	0.0584	0.06	0.06	0.307	1
rs116268586	16518289	G	A	0.0085	-0.17	0.29	0.552	-0.55	0.53	0.307	0.53
9	16936988	T	TAGA	0.006	-0.04	0.3	0.893	-0.55	0.53	0.307	0.4
rs4961757	16773921	T	A	0.172	0.01	0.05	0.819	-0.09	0.08	0.307	0.29
rs10122901	16808172	C	G	0.0905	0.17	0.07	0.0146	-0.13	0.13	0.307	0.04
rs914050	17062915	G	A	0.465	0.06	0.03	0.0545	0.06	0.06	0.308	1
rs57034735	17056931	C	CT	0.449	0.07	0.03	0.0367	0.06	0.06	0.308	0.88
rs4961426	16902347	C	G	0.0955	0.12	0.05	0.0261	0.1	0.1	0.308	0.86
rs183382600	16886012	G	A	0.01	-0.31	0.2	0.117	-0.39	0.38	0.308	0.85
rs7864745	16875622	C	T	0.099	-0.02	0.05	0.767	-0.1	0.1	0.308	0.47
rs654521	17271858	A	G	0.406	0.06	0.04	0.0803	-0.07	0.07	0.308	0.11
rs10648042	17366296	ATTG	A	0.45	0.08	0.04	0.0288	-0.07	0.07	0.308	0.06
rs10962749	16943452	G	A	0.06	0.23	0.07	0.00188	0.15	0.14	0.309	0.61
rs619357	17302356	C	A	0.137	0	0.05	0.93	-0.09	0.09	0.309	0.38
rs10810662	16905615	A	T	0.212	0.01	0.04	0.779	-0.08	0.08	0.309	0.31
c9_pos16962978	16972978	A	G	0.0355	0.1	0.08	0.253	-0.16	0.16	0.309	0.15
rs442431	17064431	T	C	0.471	0.06	0.03	0.045	0.06	0.06	0.31	1
rs400972	17066609	G	A	0.471	0.06	0.03	0.0508	0.06	0.06	0.31	1
9	16813340	T	C	0.007	-0.15	0.33	0.661	-0.64	0.63	0.31	0.49
rs10962950	17255442	C	A	0.4105	0.06	0.04	0.0738	-0.07	0.07	0.31	0.11
rs139910730	17359720	ATAC	A	0.3095	0.1	0.04	0.011	-0.08	0.07	0.31	0.03
rs694895	16997020	A	G	0.3765	-0.02	0.03	0.569	-0.06	0.06	0.311	0.55
rs72432685	16959578	GA	G	0.3915	-0.12	0.03	0.000368	-0.06	0.06	0.311	0.37
rs33979633	16776206	CG	C	0.169	0.02	0.05	0.717	-0.09	0.08	0.311	0.24
rs147821667	16575320	A	G	0.01	0.32	0.28	0.273	-0.5	0.49	0.311	0.15
rs2990670	17295837	C	G	0.406	0.06	0.04	0.0704	-0.07	0.07	0.311	0.11
rs374747829	16751666	ATG	A	0.1425	0.1	0.06	0.103	-0.12	0.12	0.311	0.1
rs10733321	16784682	C	G	0.2445	0.06	0.04	0.172	-0.08	0.07	0.311	0.08
rs386172	17066614	G	C	0.4705	0.06	0.03	0.0516	0.06	0.06	0.312	1
rs423395	17062223	G	A	0.466	0.06	0.03	0.0517	0.06	0.06	0.312	1
rs425455	17061693	T	C	0.466	0.06	0.03	0.0518	0.06	0.06	0.312	1
rs2246	17063106	C	T	0.465	0.06	0.03	0.0533	0.06	0.06	0.312	1
rs914051	17062834	G	A	0.465	0.06	0.03	0.0537	0.06	0.06	0.312	1
rs914049	17063068	T	C	0.465	0.06	0.03	0.0539	0.06	0.06	0.312	1
rs13289064	16897685	G	C	0.091	-0.01	0.06	0.799	-0.1	0.1	0.312	0.44
rs10962764	16953829	A	G	0.008	0.1	0.21	0.641	-0.38	0.37	0.312	0.26
rs10962533	16675103	C	T	0.0245	0.14	0.17	0.42	-0.31	0.3	0.312	0.19
rs35438339	17379050	AT	A	0.2935	0.1	0.04	0.0105	-0.07	0.07	0.312	0.03
rs10810640	16824921	G	C	0.1835	0.21	0.06	0.000508	-0.11	0.11	0.312	0.01
rs10810711	17062685	T	C	0.465	0.06	0.03	0.055	0.06	0.06	0.313	1
rs1685301	17058212	G	A	0.465	0.06	0.03	0.0584	0.06	0.06	0.313	1
rs7864210	16875274	A	G	0.095	-0.01	0.05	0.818	-0.1	0.1	0.313	0.42
rs35947742	16673441	C	A	0.3495	0.01	0.04	0.817	-0.08	0.08	0.313	0.31
rs200635977	16518598	GT	G	0.1985	-0.07	0.05	0.159	0.1	0.1	0.313	0.13
c9_pos17048732	17058732	G	A	0.465	0.06	0.03	0.0556	0.06	0.06	0.314	1
rs7856761	17104574	C	T	0.435	0.07	0.03	0.0321	0.06	0.06	0.314	0.88
rs3808781	17393885	G	C	0.1275	-0.01	0.05	0.852	-0.09	0.09	0.314	0.44
rs7031602	16525632	C	T	0.063	0.04	0.1	0.726	-0.18	0.18	0.314	0.29
rs1890074	16619009	C	T	0.419	-0.03	0.04	0.483	0.08	0.08	0.314	0.22
rs605916	17291057	A	G	0.405	0.06	0.04	0.0703	-0.07	0.07	0.314	0.11
rs10962953	17259794	A	G	0.4505	0.07	0.03	0.0543	-0.07	0.07	0.314	0.07
rs59882724	16891685	G	A	0.032	-0.11	0.09	0.265	-0.18	0.18	0.315	0.73
rs2210551	17362954	T	C	0.1315	-0.02	0.05	0.644	-0.09	0.09	0.315	0.5
rs10962972	17263868	G	A	0.094	-0.02	0.06	0.726	-0.11	0.11	0.315	0.47
rs10962985	17269011	C	T	0.1345	-0.01	0.05	0.853	-0.09	0.09	0.315	0.44
rs10962986	17269035	C	T	0.1345	-0.01	0.05	0.853	-0.09	0.09	0.315	0.44
rs75055408	16949064	A	C	0.0075	0.11	0.22	0.633	-0.39	0.38	0.315	0.25
rs138137019	17201195	G	A	0.0175	0.08	0.15	0.615	-0.28	0.27	0.315	0.24
rs10962743	16941398	T	C	0.2255	0.05	0.04	0.195	-0.07	0.07	0.315	0.14
rs2104915	17193138	T	C	0.18	0.06	0.04	0.187	-0.08	0.08	0.315	0.12
rs4961553	17369684	G	A	0.401	0.07	0.04	0.0666	-0.07	0.07	0.315	0.08
rs9407782	17061314	C	T	0.4655	0.06	0.03	0.0544	0.06	0.06	0.316	1
c9_pos17026448	17036448	T	A	0.2815	0.08	0.04	0.0301	0.07	0.07	0.316	0.9
rs13300416	16987464	G	A	0.3605	0.09	0.03	0.00619	0.06	0.06	0.316	0.65
rs76455205	16759187	T	C	0.0125	0.05	0.25	0.842	0.42	0.42	0.316	0.45
rs9298773	17321382	C	T	0.4045	0.07	0.04	0.0564	-0.07	0.07	0.316	0.08
rs80185362	16900561	A	C	0.0965	0.12	0.05	0.0274	0.1	0.1	0.317	0.86
rs372054691	16463505	A	G	0.0995	-0.01	0.07	0.932	0.14	0.14	0.317	0.34
rs10962765	16955672	C	T	0.008	0.11	0.21	0.61	-0.38	0.37	0.317	0.25
rs4961543	17357709	T	G	0.4025	0.06	0.04	0.071	-0.07	0.07	0.317	0.11
rs6475144	17352005	A	G	0.401	0.06	0.04	0.0747	-0.07	0.07	0.317	0.11
rs10114688	17353096	T	C	0.4015	0.06	0.04	0.0748	-0.07	0.07	0.317	0.11
rs10810754	17320544	G	A	0.4045	0.07	0.04	0.0565	-0.07	0.07	0.317	0.08
rs1582029	17243746	C	T	0.1415	-0.02	0.05	0.72	-0.09	0.09	0.318	0.5
rs10810569	16482526	G	T	0.0135	-0.24	0.23	0.305	0.43	0.43	0.318	0.17
rs670511	17293025	G	T	0.407	0.06	0.04	0.0692	-0.07	0.07	0.318	0.11
rs10810641	16829027	G	C	0.21	0.18	0.05	0.000629	-0.1	0.1	0.318	0.01
rs435831	17061349	T	C	0.4645	0.06	0.03	0.0554	0.06	0.06	0.319	1
rs10756853	17110944	C	G	0.439	0.07	0.03	0.0343	0.06	0.06	0.319	0.88
rs7049170	16610456	G	A	0.0515	0.11	0.13	0.405	0.24	0.23	0.319	0.62
rs7026991	17299265	A	G	0.406	0.06	0.04	0.072	-0.07	0.07	0.319	0.11
rs148377579	17294425	T	TC	0.406	0.06	0.04	0.0724	-0.07	0.07	0.319	0.11
rs605482	17290979	T	C	0.405	0.06	0.04	0.0729	-0.07	0.07	0.319	0.11
rs12377046	16990075	A	G	0.015	-0.2	0.13	0.13	0.26	0.25	0.319	0.1
rs12342180	17327947	A	G	0.4065	0.07	0.04	0.0604	-0.07	0.07	0.319	0.08
rs10810699	16963429	C	T	0.2595	0.07	0.04	0.0635	-0.07	0.07	0.319	0.08
rs10810595	16711204	T	C	0.0945	0.14	0.07	0.0676	-0.14	0.14	0.319	0.07
rs441761	17061509	C	T	0.466	0.06	0.03	0.0523	0.06	0.06	0.32	1
rs73646244	16771217	A	G	0.009	0.26	0.3	0.385	0.55	0.55	0.32	0.64
rs10756851	16991332	A	G	0.383	-0.01	0.03	0.728	-0.06	0.06	0.32	0.46
rs10962984	17269003	G	A	0.1335	-0.01	0.05	0.785	-0.09	0.09	0.32	0.44
rs137948635	16660851	G	GT	0.1935	0.01	0.06	0.926	-0.11	0.11	0.321	0.34
rs7848397	17373070	A	G	0.4015	0.07	0.04	0.0701	-0.07	0.07	0.321	0.08
rs13296025	16900507	G	C	0.092	-0.01	0.06	0.843	-0.1	0.1	0.322	0.44
rs10756811	16768265	C	G	0.326	0.04	0.04	0.262	-0.07	0.07	0.322	0.17
rs7864271	17359669	A	G	0.401	0.06	0.04	0.0739	-0.07	0.07	0.322	0.11
rs10810777	17360179	G	C	0.401	0.06	0.04	0.0761	-0.07	0.07	0.322	0.11
rs9298774	17321574	T	C	0.3975	0.07	0.04	0.0581	-0.07	0.07	0.322	0.08
rs10756877	17365022	A	C	0.4015	0.07	0.04	0.0671	-0.07	0.07	0.322	0.08
rs1372702	17362180	A	C	0.4015	0.07	0.04	0.0672	-0.07	0.07	0.322	0.08
rs7858530	17354396	C	T	0.402	0.07	0.04	0.0705	-0.07	0.07	0.322	0.08
rs13283291	17382575	A	G	0.2985	0.1	0.04	0.0165	-0.07	0.07	0.322	0.03
rs380977	17054608	T	C	0.4655	0.06	0.03	0.0465	0.06	0.06	0.323	1
rs2492869	17069306	G	A	0.47	0.06	0.03	0.049	0.06	0.06	0.323	1
rs389432	17060965	A	G	0.466	0.06	0.03	0.0525	0.06	0.06	0.323	1
rs12338207	16449788	T	C	0.347	-0.05	0.03	0.184	-0.06	0.07	0.323	0.9
rs10962697	16919545	C	T	0.3925	-0.05	0.03	0.117	-0.06	0.06	0.323	0.88
rs7032239	16603294	T	A	0.059	0.07	0.12	0.58	0.21	0.21	0.323	0.56
rs7018743	16603921	C	T	0.059	0.06	0.12	0.581	0.21	0.21	0.323	0.54
rs12685078	16846636	G	T	0.073	-0.03	0.06	0.632	-0.11	0.11	0.323	0.52
rs13298175	16844225	C	T	0.0565	0.14	0.08	0.0703	-0.15	0.15	0.323	0.09
rs7848980	17364507	C	T	0.4015	0.07	0.04	0.0669	-0.07	0.07	0.323	0.08
rs5896739	17362508	A	AT	0.4015	0.07	0.04	0.067	-0.07	0.07	0.323	0.08
rs3861711	17367325	A	C	0.4025	0.07	0.04	0.0681	-0.07	0.07	0.323	0.08
rs72700153	17036983	A	G	0.0295	-0.28	0.12	0.0234	0.25	0.25	0.323	0.06
rs7847660	16878246	G	A	0.0325	-0.1	0.09	0.288	-0.18	0.18	0.324	0.69
rs80087905	16740372	A	C	0.012	-0.07	0.24	0.779	0.38	0.39	0.324	0.33
rs10962768	16959173	G	A	0.0085	0.11	0.21	0.61	-0.37	0.37	0.324	0.26
rs7862069	17364157	C	A	0.4005	0.06	0.04	0.0733	-0.07	0.07	0.324	0.11
rs7030452	17363286	G	A	0.401	0.06	0.04	0.0738	-0.07	0.07	0.324	0.11
rs6475145	17363218	C	A	0.401	0.06	0.04	0.0738	-0.07	0.07	0.324	0.11
rs2225598	17365613	C	T	0.4005	0.06	0.04	0.0743	-0.07	0.07	0.324	0.11
rs7858762	17354527	C	T	0.3995	0.06	0.04	0.0819	-0.07	0.07	0.324	0.11
rs7858760	17354520	C	T	0.3995	0.06	0.04	0.082	-0.07	0.07	0.324	0.11
rs10962947	17252006	C	A	0.4035	0.07	0.04	0.0548	-0.07	0.07	0.324	0.08
rs10122987	17364514	C	T	0.4015	0.07	0.04	0.0665	-0.07	0.07	0.324	0.08
rs10738476	17364950	A	G	0.4015	0.07	0.04	0.0675	-0.07	0.07	0.324	0.08
rs419062	17069128	A	C	0.4695	0.06	0.03	0.0491	0.06	0.06	0.325	1
rs368289	17060182	C	T	0.466	0.06	0.03	0.0522	0.06	0.06	0.325	1
rs431342	17060014	G	T	0.466	0.06	0.03	0.0524	0.06	0.06	0.325	1
rs391551	17059999	G	A	0.466	0.06	0.03	0.0525	0.06	0.06	0.325	1
rs420115	17060680	A	G	0.466	0.06	0.03	0.0527	0.06	0.06	0.325	1
rs454019	17059687	C	T	0.466	0.06	0.03	0.0529	0.06	0.06	0.325	1
rs2462942	17058353	A	G	0.466	0.06	0.03	0.0561	0.06	0.06	0.325	1
rs2950171	17058542	G	A	0.466	0.06	0.03	0.0563	0.06	0.06	0.325	1
rs10810570	16489536	T	A	0.206	-0.02	0.05	0.705	-0.09	0.09	0.325	0.5
rs10962927	17239933	T	C	0.141	-0.01	0.05	0.767	-0.09	0.09	0.325	0.44
rs10810783	17395742	G	A	0.1295	-0.01	0.05	0.888	-0.09	0.09	0.325	0.44
rs605469	17290970	T	C	0.406	0.06	0.04	0.0753	-0.07	0.07	0.325	0.11
rs10124513	17350983	G	C	0.401	0.06	0.04	0.0783	-0.07	0.07	0.325	0.11
rs7028779	17350814	A	G	0.4015	0.06	0.04	0.0799	-0.07	0.07	0.325	0.11
rs10119297	17346147	G	A	0.4015	0.06	0.04	0.0804	-0.07	0.07	0.325	0.11
rs7874453	17372960	T	C	0.4025	0.07	0.04	0.0647	-0.07	0.07	0.325	0.08
rs1583988	17367616	G	T	0.4015	0.07	0.04	0.068	-0.07	0.07	0.325	0.08
rs1583989	17367617	T	C	0.4015	0.07	0.04	0.068	-0.07	0.07	0.325	0.08
rs375152	17059541	A	G	0.466	0.06	0.03	0.0532	0.06	0.06	0.326	1
rs1685302	17058232	A	G	0.466	0.06	0.03	0.0558	0.06	0.06	0.326	1
rs62560492	17028748	T	C	0.281	0.08	0.04	0.0297	0.07	0.07	0.326	0.9
rs144434289	17307575	A	AT	0.126	-0.02	0.05	0.679	-0.09	0.09	0.326	0.5
rs113161050	17242313	TC	T	0.141	-0.01	0.05	0.762	-0.09	0.09	0.326	0.44
rs72704092	16677803	A	T	0.1155	0.1	0.07	0.185	-0.13	0.14	0.326	0.14
rs10114083	17373948	C	T	0.4025	0.06	0.04	0.0714	-0.07	0.07	0.326	0.11
rs4961540	17345817	C	T	0.402	0.06	0.04	0.0762	-0.07	0.07	0.326	0.11
rs10116428	17346156	C	T	0.402	0.06	0.04	0.0763	-0.07	0.07	0.326	0.11
rs7872831	17354758	T	C	0.401	0.06	0.04	0.0766	-0.07	0.07	0.326	0.11
rs6475143	17351711	G	A	0.401	0.06	0.04	0.0768	-0.07	0.07	0.326	0.11
rs10123745	17365351	C	T	0.3995	0.07	0.04	0.0623	-0.07	0.07	0.326	0.08
rs1583987	17367368	C	T	0.4015	0.07	0.04	0.0681	-0.07	0.07	0.326	0.08
rs2099858	17366932	G	C	0.4015	0.07	0.04	0.0685	-0.07	0.07	0.326	0.08
rs12350807	16876295	T	G	0.148	0.1	0.05	0.0451	0.1	0.1	0.327	1
rs380225	17068937	A	G	0.4695	0.06	0.03	0.0492	0.06	0.06	0.327	1
rs444147	17068948	A	G	0.4695	0.06	0.03	0.0493	0.06	0.06	0.327	1
rs447681	17060444	C	T	0.466	0.06	0.03	0.0499	0.06	0.06	0.327	1
rs10962841	17058920	A	T	0.466	0.06	0.03	0.0542	0.06	0.06	0.327	1
rs390114	17057903	G	A	0.465	0.06	0.03	0.0561	0.06	0.06	0.327	1
rs7018877	16610703	G	C	0.0635	0.06	0.12	0.605	0.21	0.21	0.327	0.54
rs6475113	17191399	T	C	0.204	0.05	0.04	0.235	-0.08	0.08	0.327	0.15
rs4961547	17358477	C	A	0.4005	0.06	0.04	0.0732	-0.07	0.07	0.327	0.11
rs6475142	17350631	A	G	0.4015	0.06	0.04	0.0786	-0.07	0.07	0.327	0.11
rs1330298	16755121	A	G	0.244	0.07	0.04	0.1	-0.08	0.08	0.327	0.09
rs10810750	17312932	G	A	0.404	0.07	0.04	0.0593	-0.07	0.07	0.327	0.08
rs148171118	17058733	TC	T	0.466	0.06	0.03	0.0534	0.06	0.06	0.328	1
rs2481546	17058756	G	A	0.466	0.06	0.03	0.0541	0.06	0.06	0.328	1
rs450371	17057919	C	T	0.465	0.06	0.03	0.056	0.06	0.06	0.328	1
rs1617507	17057994	C	T	0.465	0.06	0.03	0.0562	0.06	0.06	0.328	1
rs1617737	17058084	T	A	0.465	0.06	0.03	0.0564	0.06	0.06	0.328	1
rs35336333	16865786	G	A	0.071	-0.04	0.06	0.494	-0.11	0.12	0.328	0.6
rs10962923	17235432	A	G	0.1395	-0.01	0.05	0.82	-0.09	0.09	0.328	0.44
rs10962575	16765940	A	T	0.339	0.01	0.05	0.853	0.09	0.09	0.328	0.44
rs10756874	17356475	G	A	0.4005	0.06	0.04	0.0748	-0.07	0.07	0.328	0.11
rs10810769	17348688	C	G	0.402	0.06	0.04	0.0765	-0.07	0.07	0.328	0.11
rs7869727	17348552	T	G	0.4025	0.06	0.04	0.078	-0.07	0.07	0.328	0.11
rs10119370	17346404	G	A	0.402	0.06	0.04	0.0781	-0.07	0.07	0.328	0.11
rs6475141	17350378	C	A	0.3995	0.06	0.04	0.0796	-0.07	0.07	0.328	0.11
rs9695844	17357914	T	C	0.401	0.07	0.04	0.0668	-0.07	0.07	0.328	0.08
rs4961544	17358066	A	G	0.401	0.07	0.04	0.0668	-0.07	0.07	0.328	0.08
rs139419210	17058196	AAAG	A	0.465	0.06	0.03	0.0567	0.06	0.06	0.329	1
rs263612	17105534	C	G	0.4375	0.07	0.03	0.0283	0.06	0.06	0.329	0.88
rs140951065	16882300	G	A	0.0095	0.55	0.24	0.0242	0.38	0.39	0.329	0.71
rs139191158	16912168	G	A	0.0055	0.62	0.23	0.00871	0.4	0.4	0.329	0.63
rs11999316	16758103	C	T	0.013	0.04	0.25	0.867	0.41	0.42	0.329	0.45
rs1442518	17387675	T	C	0.129	-0.01	0.05	0.828	-0.09	0.09	0.329	0.44
9	17307970	CCA	C	0.2345	0.01	0.05	0.839	-0.08	0.08	0.329	0.34
rs4961535	17230848	A	G	0.0715	0.1	0.08	0.188	-0.15	0.15	0.329	0.14
rs4961541	17355782	A	G	0.4005	0.06	0.04	0.0734	-0.07	0.07	0.329	0.11
rs10810773	17356411	C	A	0.4005	0.06	0.04	0.0734	-0.07	0.07	0.329	0.11
rs4961545	17358346	T	G	0.4005	0.06	0.04	0.0735	-0.07	0.07	0.329	0.11
rs10756875	17356550	A	G	0.401	0.07	0.04	0.0665	-0.07	0.07	0.329	0.08
rs34806014	17357265	GT	G	0.401	0.07	0.04	0.0666	-0.07	0.07	0.329	0.08
rs4961542	17357212	C	T	0.401	0.07	0.04	0.0666	-0.07	0.07	0.329	0.08
rs10810775	17356999	T	C	0.401	0.07	0.04	0.0666	-0.07	0.07	0.329	0.08
rs10810774	17356925	C	T	0.401	0.07	0.04	0.0666	-0.07	0.07	0.329	0.08
rs407790	17068966	C	A	0.468	0.06	0.03	0.0548	0.06	0.06	0.33	1
rs404669	17066808	T	C	0.4815	0.07	0.03	0.0332	0.06	0.06	0.33	0.88
rs1113379	17315352	G	T	0.14	-0.01	0.05	0.755	-0.09	0.09	0.33	0.44
rs7027292	17387242	T	C	0.1295	-0.01	0.05	0.826	-0.09	0.09	0.33	0.44
rs35002638	17389584	T	TA	0.129	-0.01	0.05	0.836	-0.09	0.09	0.33	0.44
rs1930648	17388517	T	C	0.129	-0.01	0.05	0.836	-0.09	0.09	0.33	0.44
rs10119902	17389346	T	G	0.129	-0.01	0.05	0.841	-0.09	0.09	0.33	0.44
rs10119863	17389344	T	C	0.129	-0.01	0.05	0.841	-0.09	0.09	0.33	0.44
rs12379102	17372209	C	G	0.4015	0.06	0.04	0.0722	-0.07	0.07	0.33	0.11
rs10810586	16673676	A	C	0.1285	0.11	0.07	0.116	0.13	0.13	0.331	0.89
rs10122372	16638043	T	C	0.0595	0.13	0.12	0.258	0.21	0.21	0.331	0.74
rs142203010	16939181	TAGAA	T	0.445	0.1	0.03	0.0018	0.06	0.06	0.331	0.55
rs10756861	17310426	G	A	0.14	-0.01	0.05	0.762	-0.09	0.09	0.331	0.44
rs10117379	17386640	A	G	0.1295	-0.01	0.05	0.826	-0.09	0.09	0.331	0.44
rs10120013	17389853	T	C	0.129	-0.01	0.05	0.836	-0.09	0.09	0.331	0.44
rs10120006	17389800	T	C	0.129	-0.01	0.05	0.836	-0.09	0.09	0.331	0.44
rs10738477	17389557	C	T	0.129	-0.01	0.05	0.836	-0.09	0.09	0.331	0.44
rs10119233	17388999	A	G	0.129	-0.01	0.05	0.836	-0.09	0.09	0.331	0.44
rs5896741	17388822	T	TA	0.129	-0.01	0.05	0.836	-0.09	0.09	0.331	0.44
rs10125886	17389083	T	A	0.129	-0.01	0.05	0.837	-0.09	0.09	0.331	0.44
rs1442521	17388710	A	T	0.129	-0.01	0.05	0.837	-0.09	0.09	0.331	0.44
rs10217740	16773511	G	A	0.3715	0.05	0.04	0.203	-0.06	0.07	0.331	0.17
rs13290470	16619529	A	G	0.332	-0.06	0.04	0.167	0.08	0.08	0.331	0.12
rs2044120	17349834	A	T	0.401	0.06	0.04	0.0768	-0.07	0.07	0.331	0.11
rs4961552	17368900	G	A	0.4015	0.07	0.04	0.07	-0.07	0.07	0.331	0.08
rs7023305	17386513	T	C	0.1295	-0.01	0.05	0.827	-0.09	0.09	0.332	0.44
rs9298778	17390513	C	A	0.129	-0.01	0.05	0.836	-0.09	0.09	0.332	0.44
rs4961556	17390688	T	G	0.129	-0.01	0.05	0.836	-0.09	0.09	0.332	0.44
rs1442520	17388648	A	G	0.1295	-0.01	0.05	0.839	-0.09	0.09	0.332	0.44
rs11562136	17204759	G	C	0.1895	0.06	0.04	0.157	-0.08	0.08	0.332	0.12
rs7851890	17347722	C	T	0.4025	0.06	0.04	0.08	-0.07	0.07	0.332	0.11
rs632265	17301710	C	A	0.403	0.07	0.04	0.0593	-0.07	0.07	0.332	0.08
rs10810683	16933734	T	C	0.369	-0.03	0.03	0.324	-0.06	0.06	0.333	0.65
rs997693	16484731	T	G	0.1915	-0.03	0.05	0.582	-0.09	0.09	0.333	0.56
rs7023540	17386524	A	G	0.1295	-0.01	0.05	0.827	-0.09	0.09	0.333	0.44
rs7874945	17397549	G	A	0.1285	-0.01	0.05	0.829	-0.09	0.09	0.333	0.44
rs1442525	17392055	A	G	0.129	-0.01	0.05	0.837	-0.09	0.09	0.333	0.44
rs2119907	17392152	T	C	0.129	-0.01	0.05	0.837	-0.09	0.09	0.333	0.44
rs2119906	17392107	A	T	0.129	-0.01	0.05	0.837	-0.09	0.09	0.333	0.44
rs1442522	17391531	T	C	0.129	-0.01	0.05	0.837	-0.09	0.09	0.333	0.44
rs7855555	17232333	A	T	0.0675	0.1	0.08	0.232	-0.15	0.16	0.333	0.16
rs2044119	17349864	T	C	0.402	0.06	0.04	0.0784	-0.07	0.07	0.333	0.11
rs71331487	17367399	TAAAA	T	0.4025	0.07	0.04	0.0691	-0.07	0.07	0.333	0.08
rs147837829	16884206	G	A	0.01	0.45	0.23	0.0552	0.43	0.44	0.334	0.97
rs2200599	17105586	G	A	0.434	0.07	0.03	0.0335	0.06	0.06	0.334	0.88
rs10962740	16940390	G	T	0.443	0.1	0.03	0.00232	0.06	0.06	0.334	0.55
rs10962912	17219242	C	T	0.2185	0.07	0.04	0.0866	-0.07	0.08	0.334	0.12
rs10123715	17335125	C	T	0.401	0.07	0.04	0.0667	-0.07	0.07	0.334	0.08
rs12351269	16806521	T	C	0.091	0.17	0.07	0.0149	-0.12	0.13	0.334	0.05
rs10962696	16919058	G	T	0.3945	-0.05	0.03	0.103	-0.06	0.06	0.335	0.88
rs7035357	17394465	A	G	0.129	-0.01	0.05	0.836	-0.09	0.09	0.335	0.44
rs11790341	16637265	C	T	0.311	-0.05	0.04	0.304	0.08	0.08	0.335	0.15
rs145251770	17222639	C	A	0.007	-0.33	0.24	0.171	0.46	0.47	0.335	0.13
rs10962583	16773966	T	G	0.0195	0.26	0.16	0.117	-0.28	0.29	0.335	0.1
rs13284188	17389580	T	G	0.3005	0.1	0.04	0.0165	-0.07	0.07	0.335	0.03
c9_pos16998235	17008235	A	G	0.3195	0.07	0.03	0.0291	0.06	0.06	0.336	0.88
rs1538591	16943514	C	T	0.161	-0.1	0.04	0.0183	-0.08	0.08	0.336	0.82
rs4436220	16894953	T	C	0.093	-0.02	0.05	0.738	-0.1	0.1	0.336	0.47
rs7035276	17394536	T	C	0.129	-0.01	0.05	0.838	-0.09	0.09	0.336	0.44
rs1442526	17395380	T	C	0.1285	-0.01	0.05	0.843	-0.09	0.09	0.336	0.44
rs140498125	16954508	T	TGTGC	0.008	0.11	0.22	0.613	-0.37	0.38	0.336	0.27
rs10963057	17349497	G	A	0.402	0.06	0.04	0.0766	-0.06	0.07	0.336	0.14
rs1759454	17302919	T	A	0.403	0.07	0.04	0.0609	-0.06	0.07	0.336	0.11
rs432048	17057642	C	T	0.465	0.06	0.03	0.0451	0.06	0.06	0.337	1
rs10962739	16940254	G	C	0.443	0.1	0.03	0.00246	0.06	0.06	0.337	0.55
rs2039413	17225553	A	T	0.12	-0.02	0.05	0.746	-0.09	0.09	0.337	0.5
rs3739488	17395108	T	C	0.1285	-0.01	0.05	0.849	-0.09	0.09	0.337	0.44
rs10962574	16763227	C	G	0.1735	0.01	0.05	0.807	-0.08	0.09	0.337	0.38
rs10810763	17336360	A	G	0.402	0.07	0.04	0.0672	-0.06	0.07	0.337	0.11
rs3903397	17335929	A	C	0.402	0.07	0.04	0.0672	-0.06	0.07	0.337	0.11
rs3898817	17335935	A	C	0.402	0.07	0.04	0.0672	-0.06	0.07	0.337	0.11
rs391486	17061612	G	C	0.465	0.06	0.03	0.0477	0.06	0.06	0.338	1
rs430616	17057490	G	A	0.4655	0.06	0.03	0.0591	0.06	0.06	0.338	1
rs1927636	16461429	G	C	0.3535	-0.05	0.03	0.199	-0.06	0.07	0.338	0.9
rs77703092	17315854	G	A	0.128	-0.02	0.05	0.713	-0.09	0.09	0.338	0.5
rs7870427	17396049	T	G	0.1275	-0.02	0.05	0.735	-0.09	0.09	0.338	0.5
rs4961754	16759972	C	T	0.1605	0.04	0.05	0.452	-0.09	0.09	0.338	0.21
rs1759609	17290781	T	C	0.405	0.06	0.04	0.0795	-0.06	0.07	0.338	0.14
rs2779778	17300060	G	A	0.4045	0.07	0.04	0.057	-0.06	0.07	0.338	0.11
rs2780206	17300064	C	T	0.4045	0.07	0.04	0.057	-0.06	0.07	0.338	0.11
rs2779776	17300093	G	A	0.4045	0.07	0.04	0.057	-0.06	0.07	0.338	0.11
rs147672585	16805711	G	GCACACA	0.0515	0.2	0.11	0.071	-0.19	0.2	0.338	0.09
rs400530	17057643	A	G	0.465	0.06	0.03	0.0649	0.06	0.06	0.339	1
rs137874213	17160728	A	G	0.0125	-0.09	0.17	0.582	0.31	0.32	0.339	0.27
rs9298775	17334526	A	G	0.4015	0.07	0.04	0.0653	-0.06	0.07	0.339	0.11
rs7031133	17333453	A	G	0.4015	0.07	0.04	0.0657	-0.06	0.07	0.339	0.11
rs4246136	17335585	G	A	0.4015	0.07	0.04	0.066	-0.06	0.07	0.339	0.11
rs10046851	17334801	A	G	0.4015	0.07	0.04	0.066	-0.06	0.07	0.339	0.11
rs7038197	17338464	C	T	0.4015	0.07	0.04	0.0663	-0.06	0.07	0.339	0.11
rs10963042	17338186	C	G	0.4015	0.07	0.04	0.0668	-0.06	0.07	0.339	0.11
rs17740716	16690025	A	G	0.0215	-0.05	0.18	0.789	0.31	0.33	0.34	0.34
rs619380	17302341	A	G	0.404	0.07	0.04	0.0627	-0.06	0.07	0.34	0.11
rs3808784	17333543	G	A	0.4015	0.07	0.04	0.0655	-0.06	0.07	0.34	0.11
rs10481559	17335480	C	A	0.4015	0.07	0.04	0.066	-0.06	0.07	0.34	0.11
rs10121347	16806694	G	C	0.09	0.17	0.07	0.0142	-0.12	0.13	0.34	0.05
rs12002778	16866661	T	A	0.2375	-0.08	0.04	0.0317	-0.07	0.07	0.341	0.9
rs4961539	17336338	G	C	0.4025	0.07	0.04	0.0695	-0.06	0.07	0.341	0.11
rs12375507	16699832	A	C	0.086	0.14	0.08	0.0789	-0.14	0.15	0.341	0.1
rs11791869	16921722	A	G	0.396	-0.05	0.03	0.137	-0.06	0.06	0.342	0.88
rs116559725	16449849	G	C	0.0125	0.31	0.23	0.182	0.4	0.42	0.342	0.85
rs10810708	17044769	C	G	0.4805	0.08	0.03	0.0208	0.06	0.06	0.342	0.77
9	16952422	C	CAA	0.288	-0.04	0.04	0.373	-0.07	0.07	0.342	0.71
rs3824392	17340377	G	A	0.4015	0.06	0.04	0.0765	-0.06	0.07	0.342	0.14
rs10810764	17339718	A	G	0.4025	0.06	0.04	0.0789	-0.06	0.07	0.342	0.14
rs7044462	17336882	T	C	0.402	0.07	0.04	0.0685	-0.06	0.07	0.342	0.11
rs7851036	16845530	C	T	0.3715	0.01	0.04	0.806	-0.07	0.07	0.343	0.32
rs943741	16551131	G	C	0.3815	-0.05	0.04	0.266	0.07	0.08	0.343	0.18
rs10810770	17348689	C	G	0.401	0.06	0.04	0.0715	-0.06	0.07	0.343	0.14
rs2450534	17059179	G	A	0.464	0.06	0.03	0.0497	0.06	0.06	0.344	1
rs150372135	16458209	AG	A	0.07	-0.1	0.07	0.167	-0.13	0.13	0.344	0.84
rs34898115	17037775	G	GTA	0.28	0.08	0.04	0.034	0.06	0.07	0.344	0.8
rs10963028	17317501	G	C	0.1405	-0.02	0.05	0.745	-0.08	0.09	0.344	0.56
rs10962918	17232207	T	A	0.119	-0.02	0.05	0.744	-0.09	0.09	0.344	0.5
rs140041786	17244203	GGTTTTT	G	0.1405	-0.01	0.05	0.763	-0.08	0.09	0.344	0.5
rs10962857	17080337	T	G	0.1145	0.03	0.05	0.581	-0.09	0.1	0.344	0.28
rs447081	17056842	C	T	0.466	0.06	0.03	0.0643	0.06	0.06	0.345	1
rs1023778	17379161	C	A	0.1405	-0.02	0.05	0.755	-0.08	0.09	0.345	0.56
rs116961835	16747054	T	G	0.008	0.08	0.27	0.76	0.54	0.56	0.345	0.46
rs9298777	17390444	A	G	0.1295	-0.01	0.05	0.829	-0.09	0.09	0.345	0.44
c9_pos16897141	16907141	G	A	0.033	-0.16	0.09	0.0744	-0.16	0.17	0.346	1
rs379274	16999123	A	G	0.3745	-0.02	0.03	0.587	-0.06	0.06	0.346	0.55
rs10114730	17353077	T	G	0.4	0.06	0.04	0.0889	-0.06	0.07	0.346	0.14
rs10120757	17353087	G	A	0.4	0.06	0.04	0.0889	-0.06	0.07	0.346	0.14
rs7854818	17353689	C	T	0.4	0.06	0.04	0.089	-0.06	0.07	0.346	0.14
rs7868684	17353918	G	A	0.4	0.06	0.04	0.0891	-0.06	0.07	0.346	0.14
rs7868700	17353987	G	A	0.4	0.06	0.04	0.0891	-0.06	0.07	0.346	0.14
rs263638	17019858	A	C	0.319	0.08	0.03	0.0269	0.06	0.06	0.347	0.77
rs62560464	17022183	A	G	0.2795	0.08	0.04	0.0297	0.06	0.07	0.348	0.8
rs6475128	17309813	G	A	0.1365	-0.01	0.05	0.885	-0.08	0.09	0.348	0.5
rs7038494	16854075	T	C	0.0725	-0.01	0.06	0.915	-0.11	0.12	0.348	0.46
rs7871926	17354045	A	C	0.4	0.06	0.04	0.0894	-0.06	0.07	0.348	0.14
rs1576962	17251386	G	A	0.3975	0.07	0.04	0.0524	-0.06	0.07	0.348	0.11
rs75182310	16424557	C	A	0.0125	0.15	0.23	0.506	0.41	0.44	0.349	0.6
rs6475122	17244601	C	T	0.134	-0.01	0.05	0.859	-0.08	0.09	0.349	0.5
rs4436219	16894803	T	C	0.0925	-0.01	0.06	0.793	-0.1	0.1	0.349	0.44
rs10756773	16657796	C	T	0.431	-0.02	0.04	0.673	0.08	0.08	0.349	0.26
rs7022024	17338410	A	G	0.401	0.07	0.04	0.0672	-0.06	0.07	0.349	0.11
rs7871223	16676486	A	G	0.083	0.15	0.09	0.0905	-0.15	0.16	0.349	0.1
rs1361073	16711287	T	C	0.078	0.18	0.08	0.0332	-0.14	0.15	0.349	0.06
rs425343	17055227	G	T	0.464	0.06	0.03	0.0538	0.06	0.06	0.35	1
rs10733336	16992325	G	C	0.376	-0.01	0.03	0.667	-0.06	0.06	0.35	0.46
rs73646740	16950880	T	C	0.008	0.11	0.22	0.621	-0.35	0.37	0.35	0.29
rs35972588	16882887	CTT	CT	0.0845	-0.11	0.08	0.16	-0.13	0.14	0.351	0.9
rs10810703	16996034	T	C	0.3765	-0.02	0.03	0.613	-0.06	0.06	0.351	0.55
rs1001301	16925586	G	A	0.3955	-0.05	0.03	0.163	-0.06	0.06	0.352	0.88
rs10810564	16450274	C	T	0.071	-0.09	0.07	0.196	-0.12	0.13	0.352	0.84
rs12682753	16933561	G	T	0.129	0.15	0.05	0.00258	0.08	0.09	0.352	0.5
rs188692159	17407940	A	G	0.009	-0.01	0.23	0.981	-0.38	0.4	0.352	0.42
rs13294865	17053557	G	A	0.4925	0.06	0.03	0.0481	0.06	0.06	0.353	1
rs1628015	17056858	C	T	0.4635	0.06	0.03	0.058	0.06	0.06	0.353	1
rs140648255	17056846	TAATC	T	0.4635	0.06	0.03	0.058	0.06	0.06	0.353	1
rs151304452	17043155	A	AGCT	0.0095	0.16	0.2	0.434	-0.36	0.38	0.353	0.23
rs16934855	16609109	T	C	0.0635	0.11	0.12	0.35	0.2	0.21	0.354	0.71
rs7037019	17359904	T	A	0.132	-0.02	0.05	0.678	-0.08	0.09	0.354	0.56
rs10962450	16490527	A	T	0.007	0.14	0.28	0.63	-0.47	0.51	0.354	0.29
rs386620	17056335	A	G	0.464	0.06	0.03	0.0589	0.06	0.06	0.355	1
rs137965465	17132163	G	A	0.009	0.05	0.2	0.809	-0.31	0.33	0.355	0.35
rs10810749	17312886	T	A	0.3995	0.07	0.04	0.0444	-0.06	0.07	0.355	0.11
rs10962545	16701680	C	A	0.085	0.15	0.08	0.0753	-0.14	0.15	0.355	0.09
rs71327893	17054257	A	AT	0.498	0.06	0.03	0.0569	0.06	0.06	0.356	1
rs140849520	16884573	C	T	0.0125	-0.3	0.18	0.102	-0.33	0.35	0.356	0.94
rs77962191	16684383	T	C	0.0215	-0.05	0.18	0.776	0.3	0.33	0.356	0.35
rs4961531	17188182	G	A	0.203	0.05	0.04	0.215	-0.07	0.08	0.356	0.18
rs7028593	17320881	G	A	0.398	0.07	0.04	0.054	-0.06	0.07	0.356	0.11
rs3831184	16705988	CAG	C	0.083	0.14	0.08	0.0829	-0.14	0.15	0.356	0.1
rs10962922	17234883	T	C	0.1335	-0.01	0.05	0.842	-0.08	0.09	0.357	0.5
rs182031	17001122	A	C	0.377	-0.01	0.03	0.698	-0.06	0.06	0.357	0.46
rs1582031	17261350	T	G	0.4405	0.07	0.03	0.0376	-0.06	0.06	0.357	0.05
rs71504855	17306864	A	C	0.0525	0.07	0.09	0.492	0.17	0.18	0.358	0.62
rs34358697	16899083	T	C	0.0925	-0.01	0.06	0.887	-0.09	0.1	0.358	0.49
rs34205461	17389735	C	CATAT	0.13	-0.01	0.05	0.825	-0.09	0.09	0.358	0.44
rs1337395	16669912	C	A	0.2395	0.03	0.05	0.57	-0.09	0.1	0.358	0.28
rs7866391	17210039	A	G	0.065	0.06	0.08	0.46	-0.15	0.16	0.358	0.24
rs10962547	16712247	T	A	0.1715	0.06	0.06	0.369	-0.11	0.12	0.358	0.21
rs431059	17056969	C	T	0.4635	0.06	0.03	0.0615	0.06	0.06	0.359	1
rs371653	17057024	G	A	0.4635	0.06	0.03	0.0615	0.06	0.06	0.359	1
rs263582	17039543	T	C	0.085	0.16	0.06	0.00687	0.1	0.11	0.359	0.63
rs10465046	17226889	G	C	0.1315	-0.02	0.05	0.726	-0.08	0.09	0.359	0.56
rs10810748	17312829	A	G	0.3975	0.07	0.04	0.0479	-0.06	0.07	0.359	0.11
rs12337154	17318434	C	G	0.3975	0.07	0.04	0.049	-0.06	0.07	0.359	0.11
rs144263085	17320490	T	TTTTG	0.397	0.07	0.04	0.0522	-0.06	0.07	0.359	0.11
rs10125333	17321670	T	C	0.397	0.07	0.04	0.0532	-0.06	0.07	0.359	0.11
rs35154644	17038452	A	AT	0.085	0.16	0.06	0.00708	0.1	0.11	0.36	0.63
rs610175	17274816	G	A	0.1325	-0.02	0.05	0.714	-0.08	0.09	0.36	0.56
rs1930645	17311004	C	T	0.14	-0.02	0.05	0.716	-0.08	0.09	0.36	0.56
rs10810613	16758926	A	T	0.174	0.03	0.05	0.496	-0.08	0.09	0.36	0.29
rs7028930	17320822	C	G	0.397	0.07	0.04	0.0532	-0.06	0.07	0.36	0.11
rs7044823	17320792	C	T	0.397	0.07	0.04	0.0532	-0.06	0.07	0.36	0.11
rs11404854	17331361	AT	A	0.399	0.07	0.04	0.0566	-0.06	0.07	0.36	0.11
rs3765040	17330558	A	T	0.399	0.07	0.04	0.0566	-0.06	0.07	0.36	0.11
rs10810575	16533377	C	T	0.0455	0.01	0.12	0.916	-0.21	0.23	0.361	0.4
rs10810756	17324268	T	C	0.398	0.07	0.04	0.0534	-0.06	0.07	0.361	0.11
rs10810738	17223492	G	A	0.195	0.12	0.04	0.00766	-0.07	0.08	0.361	0.03
rs404912	17056812	T	A	0.4645	0.06	0.03	0.0591	0.06	0.06	0.362	1
rs383580	17056511	A	C	0.4635	0.06	0.03	0.0606	0.06	0.06	0.362	1
rs503290	17067010	C	G	0.4815	0.07	0.03	0.0321	0.06	0.06	0.362	0.88
rs7048805	16552309	C	T	0.0625	0.11	0.12	0.348	0.2	0.21	0.362	0.71
rs7046026	16449673	T	C	0.44	-0.02	0.03	0.547	-0.06	0.06	0.362	0.55
rs2780207	17299574	G	C	0.1335	-0.01	0.05	0.783	-0.08	0.09	0.362	0.5
rs10962938	17246670	G	A	0.1325	-0.01	0.05	0.832	-0.08	0.09	0.362	0.5
rs263637	17020111	C	T	0.025	0.35	0.11	0.000928	0.18	0.19	0.362	0.44
rs7854802	17339793	A	G	0.401	0.06	0.04	0.0813	-0.06	0.07	0.362	0.14
rs7870101	17339839	C	T	0.401	0.06	0.04	0.0814	-0.06	0.07	0.362	0.14
rs389733	17056442	A	C	0.4635	0.06	0.03	0.0605	0.06	0.06	0.363	1
rs4147023	17233403	T	C	0.1335	-0.01	0.05	0.893	-0.08	0.09	0.363	0.5
rs72548959	17184318	C	CAT	0.1565	0.05	0.05	0.3	-0.08	0.08	0.363	0.17
rs10756866	17325675	C	G	0.398	0.07	0.04	0.0531	-0.06	0.07	0.363	0.11
rs10756867	17325704	G	C	0.398	0.07	0.04	0.0532	-0.06	0.07	0.363	0.11
rs3780258	17331927	A	G	0.4	0.07	0.04	0.0585	-0.06	0.07	0.363	0.11
rs113402698	16837331	G	A	0.0325	-0.11	0.1	0.281	-0.17	0.19	0.364	0.78
rs151055489	16455677	C	T	0.009	-0.18	0.27	0.516	-0.43	0.47	0.364	0.64
rs452158	16998232	T	C	0.3755	-0.02	0.03	0.631	-0.06	0.06	0.364	0.55
rs7034768	17246197	C	T	0.1335	-0.01	0.05	0.842	-0.08	0.09	0.364	0.5
rs7044254	17241468	G	A	0.1335	-0.01	0.05	0.846	-0.08	0.09	0.364	0.5
rs10963081	17401063	A	G	0.1305	-0.01	0.05	0.913	-0.08	0.09	0.364	0.5
rs10962762	16949930	C	T	0.008	0.1	0.22	0.657	-0.34	0.37	0.364	0.31
rs263555	17125269	T	A	0.155	0.06	0.05	0.234	-0.08	0.09	0.364	0.17
rs4246135	17327271	A	G	0.4	0.07	0.04	0.0584	-0.06	0.07	0.364	0.11
rs1591138	17261209	G	A	0.4405	0.07	0.03	0.04	-0.06	0.06	0.364	0.05
rs12379306	17054142	A	G	0.4985	0.06	0.03	0.0527	0.06	0.06	0.365	1
rs388786	17056200	A	G	0.464	0.06	0.03	0.0596	0.06	0.06	0.365	1
rs452396	17056226	T	G	0.464	0.06	0.03	0.0597	0.06	0.06	0.365	1
rs7847203	16765934	G	A	0.013	0.23	0.26	0.369	0.36	0.4	0.365	0.79
rs7035318	17246607	A	G	0.1335	-0.01	0.05	0.842	-0.08	0.09	0.365	0.5
rs7025912	17240965	T	C	0.1335	-0.01	0.05	0.843	-0.08	0.09	0.365	0.5
rs117650231	16787400	A	G	0.0075	-0.31	0.29	0.29	0.42	0.47	0.365	0.19
rs34953033	17024621	A	G	0.2805	0.08	0.04	0.0248	0.06	0.07	0.366	0.8
rs35134478	16927309	C	T	0.2905	0.01	0.04	0.759	0.06	0.07	0.366	0.54
rs4430173	17248125	C	T	0.1335	-0.01	0.05	0.841	-0.08	0.09	0.366	0.5
rs7044783	17241865	G	A	0.1335	-0.01	0.05	0.843	-0.08	0.09	0.366	0.5
rs142817515	17241627	A	AG	0.1335	-0.01	0.05	0.843	-0.08	0.09	0.366	0.5
rs7043703	17241284	A	G	0.1335	-0.01	0.05	0.843	-0.08	0.09	0.366	0.5
rs11534160	17241269	T	C	0.1335	-0.01	0.05	0.844	-0.08	0.09	0.366	0.5
rs34079433	16451056	ATTAACT	A	0.429	-0.01	0.03	0.702	-0.06	0.06	0.366	0.46
rs76542317	16526766	C	A	0.045	0	0.12	0.997	-0.21	0.23	0.366	0.42
rs75057108	16694362	A	T	0.0195	-0.04	0.19	0.824	0.3	0.34	0.366	0.38
rs145970494	16692957	G	C	0.0195	-0.04	0.19	0.842	0.3	0.34	0.366	0.38
rs9298772	17319956	A	C	0.397	0.07	0.04	0.05	-0.06	0.07	0.366	0.11
rs36096349	17024781	G	C	0.2805	0.08	0.04	0.0251	0.06	0.07	0.367	0.8
rs10962941	17247667	G	A	0.1325	-0.01	0.05	0.771	-0.08	0.09	0.367	0.5
rs6475125	17250170	A	G	0.1335	-0.01	0.05	0.839	-0.08	0.09	0.367	0.5
rs10962942	17249135	T	C	0.1335	-0.01	0.05	0.84	-0.08	0.09	0.367	0.5
rs7040098	17240716	C	T	0.1335	-0.01	0.05	0.854	-0.08	0.09	0.367	0.5
rs10962933	17244494	G	A	0.1335	-0.01	0.05	0.871	-0.08	0.09	0.367	0.5
rs10629555	17233724	T	TAC	0.1335	-0.01	0.05	0.884	-0.08	0.09	0.367	0.5
rs4961548	17366568	T	A	0.4015	0.07	0.04	0.0687	-0.06	0.07	0.367	0.11
rs1582030	17261546	A	G	0.44	0.07	0.03	0.0401	-0.06	0.06	0.367	0.05
rs12376282	17053994	G	A	0.498	0.06	0.03	0.0573	0.05	0.06	0.368	0.88
rs391156	17056023	C	T	0.464	0.06	0.03	0.059	0.05	0.06	0.368	0.88
rs10962940	17247214	T	A	0.1325	-0.01	0.05	0.762	-0.08	0.09	0.368	0.5
rs7021738	17234199	T	A	0.1345	-0.01	0.05	0.817	-0.08	0.09	0.368	0.5
rs141646435	16690946	TC	T	0.021	-0.06	0.19	0.755	0.29	0.33	0.368	0.36
rs6475109	17149762	G	A	0.1635	0.04	0.04	0.354	-0.07	0.08	0.368	0.22
rs2774629	17153201	T	C	0.171	0.04	0.04	0.356	-0.07	0.08	0.368	0.22
rs7043062	16825110	T	C	0.186	0.2	0.06	0.000545	-0.1	0.11	0.368	0.02
rs390228	17055776	C	G	0.464	0.06	0.03	0.0577	0.05	0.06	0.369	0.88
rs2779779	17299571	G	A	0.1325	-0.02	0.05	0.71	-0.08	0.09	0.369	0.56
9	17248538	A	AT	0.1325	-0.01	0.05	0.767	-0.08	0.09	0.369	0.5
9	17248537	A	AGT	0.1325	-0.01	0.05	0.767	-0.08	0.09	0.369	0.5
rs77400692	16725564	G	A	0.011	0.01	0.25	0.977	0.38	0.42	0.369	0.45
rs7044658	16519571	T	C	0.3475	-0.03	0.03	0.316	0.06	0.06	0.369	0.18
rs10756822	16876337	C	G	0.2775	-0.06	0.04	0.0819	-0.06	0.07	0.37	1
rs10962586	16777540	T	C	0.1515	0.02	0.07	0.798	0.11	0.13	0.37	0.54
rs7035525	17246567	G	A	0.133	-0.01	0.05	0.804	-0.08	0.09	0.37	0.5
rs10120761	17383194	T	A	0.13	-0.01	0.05	0.82	-0.08	0.09	0.37	0.5
rs7046327	17250916	T	C	0.133	-0.01	0.05	0.835	-0.08	0.09	0.37	0.5
rs1576959	17245729	C	A	0.133	-0.01	0.05	0.85	-0.08	0.09	0.37	0.5
rs12685962	16849517	C	G	0.074	-0.01	0.06	0.861	-0.1	0.11	0.37	0.47
rs2780214	17405618	T	C	0.129	-0.01	0.05	0.809	-0.09	0.09	0.37	0.44
rs139180562	17267896	A	G	0.0195	-0.02	0.13	0.87	0.21	0.24	0.37	0.4
rs10810700	16967090	T	G	0.381	0.02	0.03	0.468	-0.06	0.06	0.37	0.23
rs3824391	17340383	A	G	0.4005	0.06	0.04	0.0755	-0.06	0.07	0.37	0.14
rs10962543	16698822	T	C	0.0835	0.15	0.08	0.0796	-0.14	0.15	0.37	0.09
rs4961422	16851320	G	A	0.1105	0.1	0.05	0.0571	0.09	0.1	0.371	0.93
rs13299760	17024162	C	T	0.28	0.08	0.04	0.0252	0.06	0.07	0.371	0.8
rs2165688	17368655	T	G	0.133	-0.02	0.05	0.626	-0.08	0.09	0.371	0.56
rs1576958	17245775	C	T	0.1325	-0.01	0.05	0.792	-0.08	0.09	0.371	0.5
rs57095710	17302200	C	CT	0.158	-0.01	0.05	0.82	-0.08	0.09	0.371	0.5
rs2104914	17269657	A	T	0.1325	-0.01	0.05	0.824	-0.08	0.09	0.371	0.5
rs79670841	17252459	CATT	C	0.133	-0.01	0.05	0.834	-0.08	0.09	0.371	0.5
rs111961840	17252881	AT	A	0.1325	-0.01	0.05	0.845	-0.08	0.09	0.371	0.5
rs17813471	16680901	T	C	0.0205	-0.05	0.19	0.801	0.29	0.33	0.371	0.37
rs7034418	17193945	G	A	0.203	0.05	0.04	0.216	-0.07	0.08	0.371	0.18
rs147282081	17136529	G	A	0.032	-0.26	0.13	0.0564	0.24	0.26	0.371	0.09
rs378407	17055536	C	T	0.464	0.06	0.03	0.0575	0.05	0.06	0.372	0.88
rs263633	17001216	C	A	0.375	-0.01	0.03	0.697	-0.05	0.06	0.372	0.55
rs10962926	17239655	A	C	0.1325	-0.01	0.05	0.78	-0.08	0.09	0.372	0.5
rs6475124	17249937	T	C	0.1325	-0.01	0.05	0.82	-0.08	0.09	0.372	0.5
rs4961524	17050077	A	G	0.145	0.03	0.05	0.535	-0.08	0.09	0.372	0.29
rs75278748	17172200	TG	CG	0.173	0.04	0.04	0.38	-0.07	0.08	0.372	0.22
rs12378588	16788274	A	G	0.089	0.14	0.07	0.0455	-0.12	0.13	0.372	0.08
rs34180956	16868792	TTG	T	0.0865	-0.09	0.06	0.172	-0.1	0.12	0.373	0.94
rs17825396	17022841	G	C	0.28	0.08	0.04	0.0241	0.06	0.07	0.373	0.8
rs7865807	17370806	T	A	0.1345	-0.02	0.05	0.702	-0.08	0.09	0.373	0.56
rs10120733	17383044	G	A	0.13	-0.01	0.05	0.831	-0.08	0.09	0.373	0.5
rs1576961	17251384	G	A	0.133	-0.01	0.05	0.833	-0.08	0.09	0.373	0.5
rs118028898	17284788	T	C	0.0195	-0.02	0.13	0.861	0.21	0.24	0.373	0.4
rs943739	16550860	T	C	0.369	-0.04	0.04	0.312	0.07	0.08	0.373	0.22
rs10810678	16928230	C	T	0.402	0.05	0.03	0.121	0.05	0.06	0.374	1
rs425003	17055361	A	C	0.464	0.06	0.03	0.057	0.05	0.06	0.374	0.88
rs76055798	17023276	G	C	0.2805	0.08	0.04	0.0245	0.06	0.07	0.374	0.8
rs35607466	16763404	C	CA	0.017	0.15	0.21	0.476	0.3	0.34	0.374	0.71
rs10810753	17317788	C	T	0.1325	-0.01	0.05	0.763	-0.08	0.09	0.374	0.5
rs7018523	17267069	G	T	0.1325	-0.01	0.05	0.809	-0.08	0.09	0.374	0.5
rs1930647	17383905	G	A	0.13	-0.01	0.05	0.828	-0.08	0.09	0.374	0.5
rs78737985	17243512	C	T	0.1335	-0.01	0.05	0.853	-0.08	0.09	0.374	0.5
rs10962932	17243017	T	C	0.1335	-0.01	0.05	0.854	-0.08	0.09	0.374	0.5
rs11531656	17242948	A	T	0.1335	-0.01	0.05	0.854	-0.08	0.09	0.374	0.5
rs7035869	16739525	C	G	0.011	-0.01	0.25	0.983	0.37	0.42	0.374	0.44
rs183731741	17141018	G	A	0.0135	-0.03	0.16	0.87	0.27	0.3	0.374	0.38
rs2383004	16704216	C	T	0.231	0.06	0.04	0.15	-0.07	0.08	0.374	0.15
rs7854724	17339879	T	C	0.4005	0.06	0.04	0.0785	-0.06	0.07	0.374	0.14
rs35444065	17353596	G	GT	0.402	0.06	0.04	0.0926	-0.06	0.07	0.374	0.14
rs142418197	16662733	AAAAAT	A	0.034	0.26	0.14	0.0652	-0.24	0.27	0.374	0.1
rs7037041	17359994	C	A	0.1315	-0.02	0.05	0.695	-0.08	0.09	0.375	0.56
rs7032523	16603483	T	A	0.061	0.05	0.12	0.702	0.19	0.21	0.375	0.56
rs201077126	17257386	T	A	0.1325	-0.01	0.05	0.806	-0.08	0.09	0.375	0.5
rs12235987	17243399	A	G	0.1335	-0.01	0.05	0.856	-0.08	0.09	0.375	0.5
rs1927619	16450882	G	C	0.435	-0.01	0.03	0.671	-0.06	0.06	0.375	0.46
rs34930901	16878447	C	CA	0.286	0.01	0.04	0.901	-0.07	0.08	0.375	0.37
rs10810579	16625061	T	C	0.3555	-0.04	0.04	0.314	0.07	0.08	0.375	0.22
rs10810751	17314292	T	A	0.3965	0.07	0.04	0.0523	-0.06	0.07	0.375	0.11
rs7849084	17313614	C	A	0.3965	0.07	0.04	0.0525	-0.06	0.07	0.375	0.11
rs7849085	17313619	G	A	0.3965	0.07	0.04	0.0525	-0.06	0.07	0.375	0.11
rs11366075	17237476	GA	G	0.1355	-0.02	0.05	0.63	-0.08	0.09	0.376	0.56
rs9407794	17272336	G	C	0.132	-0.02	0.05	0.743	-0.08	0.09	0.376	0.56
rs10962989	17270847	C	T	0.1325	-0.01	0.05	0.792	-0.08	0.09	0.376	0.5
rs7018856	17267583	A	T	0.133	-0.01	0.05	0.803	-0.08	0.09	0.376	0.5
rs10963011	17295334	A	G	0.1335	-0.01	0.05	0.83	-0.08	0.09	0.376	0.5
rs76485966	16738403	T	A	0.011	-0.01	0.25	0.979	0.37	0.42	0.376	0.44
rs77294863	16635383	T	C	0.048	0.1	0.13	0.461	-0.21	0.23	0.376	0.24
rs7028249	17199149	A	G	0.2035	0.05	0.04	0.219	-0.07	0.08	0.376	0.18
rs10963027	17313996	G	T	0.3965	0.07	0.04	0.0526	-0.06	0.07	0.376	0.11
rs7042700	17371520	G	C	0.1335	-0.02	0.05	0.645	-0.08	0.09	0.377	0.56
rs372058504	17259141	G	A	0.1325	-0.02	0.05	0.748	-0.08	0.09	0.377	0.56
rs263632	17001291	C	T	0.3745	-0.01	0.03	0.706	-0.05	0.06	0.377	0.55
rs77535770	17253173	T	G	0.1315	-0.01	0.05	0.759	-0.08	0.09	0.377	0.5
rs78862252	17252715	A	G	0.1315	-0.01	0.05	0.759	-0.08	0.09	0.377	0.5
rs55829722	17271218	C	T	0.1325	-0.01	0.05	0.791	-0.08	0.09	0.377	0.5
rs10962983	17268658	A	C	0.1325	-0.01	0.05	0.802	-0.08	0.09	0.377	0.5
rs10962977	17268196	T	G	0.1325	-0.01	0.05	0.803	-0.08	0.09	0.377	0.5
rs10962981	17268493	T	A	0.1325	-0.01	0.05	0.803	-0.08	0.09	0.377	0.5
rs10962987	17269184	G	T	0.1325	-0.01	0.05	0.803	-0.08	0.09	0.377	0.5
rs3814137	17235563	C	A	0.1315	-0.01	0.05	0.864	-0.08	0.09	0.377	0.5
rs113332790	17232991	CAGAAA	C	0.1325	-0.01	0.05	0.873	-0.08	0.09	0.377	0.5
rs10810752	17314532	G	T	0.3955	0.07	0.04	0.0575	-0.06	0.07	0.377	0.11
rs12346397	17311346	A	G	0.129	-0.02	0.05	0.675	-0.08	0.09	0.378	0.56
rs9407792	17272141	T	C	0.1325	-0.01	0.05	0.788	-0.08	0.09	0.378	0.5
rs3814139	17236376	A	G	0.1325	-0.01	0.05	0.793	-0.08	0.09	0.378	0.5
rs2095145	17269857	T	C	0.1325	-0.01	0.05	0.795	-0.08	0.09	0.378	0.5
rs138579656	17239448	T	TA	0.1345	-0.01	0.05	0.828	-0.08	0.09	0.378	0.5
rs3814138	17236365	C	T	0.132	-0.01	0.05	0.834	-0.08	0.09	0.378	0.5
rs2815177	17139876	C	T	0.1685	0.04	0.04	0.337	-0.07	0.08	0.378	0.22
rs10963026	17313926	T	C	0.3965	0.07	0.04	0.0534	-0.06	0.07	0.378	0.11
rs10962835	17053786	T	C	0.498	0.06	0.03	0.054	0.05	0.06	0.379	0.88
rs4961551	17367673	A	G	0.1315	-0.02	0.05	0.68	-0.08	0.09	0.379	0.56
rs636093	17273609	G	A	0.1315	-0.02	0.05	0.742	-0.08	0.09	0.379	0.56
rs9407793	17272193	G	T	0.1315	-0.02	0.05	0.742	-0.08	0.09	0.379	0.56
rs664447	17276221	C	T	0.1315	-0.02	0.05	0.743	-0.08	0.09	0.379	0.56
rs1348279	17333005	T	C	0.1325	-0.01	0.05	0.764	-0.08	0.09	0.379	0.5
rs11525918	17243065	T	G	0.1315	-0.01	0.05	0.779	-0.08	0.09	0.379	0.5
rs112993022	17252889	G	A	0.133	-0.01	0.05	0.83	-0.08	0.09	0.379	0.5
rs1372700	17401525	A	G	0.129	0	0.05	0.942	-0.08	0.09	0.379	0.44
rs10962834	17053760	C	T	0.498	0.06	0.03	0.0537	0.05	0.06	0.38	0.88
rs1113381	17315307	C	T	0.129	-0.02	0.05	0.676	-0.08	0.09	0.38	0.56
rs12237892	17243449	G	C	0.1315	-0.01	0.05	0.778	-0.08	0.09	0.38	0.5
rs1819484	17243559	T	G	0.1325	-0.01	0.05	0.783	-0.08	0.09	0.38	0.5
rs74778678	17240119	G	GTCT	0.1345	-0.01	0.05	0.835	-0.08	0.09	0.38	0.5
rs117329371	16470735	T	A	0.021	-0.13	0.19	0.496	0.32	0.36	0.38	0.27
rs10962960	17262401	G	C	0.1315	-0.02	0.05	0.729	-0.08	0.09	0.381	0.56
rs11543981	17260440	T	G	0.1315	-0.02	0.05	0.729	-0.08	0.09	0.381	0.56
rs11562139	17256436	T	C	0.1315	-0.02	0.05	0.734	-0.08	0.09	0.381	0.56
rs10962674	16900277	A	G	0.012	0.44	0.15	0.00312	0.24	0.27	0.381	0.52
rs111582967	17315960	A	ATTCTGTTTT	0.1325	-0.01	0.05	0.777	-0.08	0.09	0.381	0.5
rs7848118	17316899	C	T	0.1325	-0.01	0.05	0.788	-0.08	0.09	0.381	0.5
rs7040666	17256156	T	G	0.1335	-0.01	0.05	0.823	-0.08	0.09	0.381	0.5
rs634446	17301211	A	C	0.1325	-0.01	0.05	0.826	-0.08	0.09	0.381	0.5
rs13291000	16855490	G	A	0.072	-0.01	0.06	0.829	-0.1	0.12	0.381	0.5
rs10962928	17240271	C	G	0.1345	-0.01	0.05	0.834	-0.08	0.09	0.381	0.5
rs10756772	16654768	C	G	0.4275	-0.02	0.04	0.582	0.07	0.08	0.381	0.31
rs2083695	17367073	G	A	0.1315	-0.02	0.05	0.689	-0.08	0.09	0.382	0.56
rs2779774	17278581	A	G	0.1315	-0.02	0.05	0.727	-0.08	0.09	0.382	0.56
rs56402716	17257154	G	A	0.1315	-0.02	0.05	0.733	-0.08	0.09	0.382	0.56
rs10962979	17268419	C	A	0.1315	-0.02	0.05	0.735	-0.08	0.09	0.382	0.56
rs7046951	17254669	A	G	0.1325	-0.01	0.05	0.762	-0.08	0.09	0.382	0.5
rs9407804	17290097	G	T	0.1325	-0.01	0.05	0.816	-0.08	0.09	0.382	0.5
rs10963010	17295197	C	T	0.1325	-0.01	0.05	0.82	-0.08	0.09	0.382	0.5
rs34884121	17312015	A	AT	0.1325	-0.01	0.05	0.824	-0.08	0.09	0.382	0.5
rs10756863	17310570	C	T	0.1325	-0.01	0.05	0.824	-0.08	0.09	0.382	0.5
rs10114324	17310685	G	A	0.1325	-0.01	0.05	0.824	-0.08	0.09	0.382	0.5
rs6475126	17309374	A	T	0.1325	-0.01	0.05	0.824	-0.08	0.09	0.382	0.5
rs7874597	17309415	G	A	0.1325	-0.01	0.05	0.824	-0.08	0.09	0.382	0.5
rs143654666	17308968	A	ATG	0.1325	-0.01	0.05	0.824	-0.08	0.09	0.382	0.5
rs6475127	17309506	C	T	0.1325	-0.01	0.05	0.824	-0.08	0.09	0.382	0.5
rs3808785	17308405	A	G	0.1325	-0.01	0.05	0.824	-0.08	0.09	0.382	0.5
rs6475129	17309886	A	T	0.1325	-0.01	0.05	0.825	-0.08	0.09	0.382	0.5
rs10756865	17314960	A	T	0.1325	-0.01	0.05	0.825	-0.08	0.09	0.382	0.5
rs3840728	17308235	AATTT	A	0.1325	-0.01	0.05	0.825	-0.08	0.09	0.382	0.5
rs632255	17301716	T	C	0.1325	-0.01	0.05	0.825	-0.08	0.09	0.382	0.5
rs1930639	17272891	C	G	0.1315	-0.02	0.05	0.726	-0.08	0.09	0.383	0.56
rs10756850	16989641	G	T	0.367	-0.01	0.03	0.679	-0.05	0.06	0.383	0.55
rs12238753	17251993	C	G	0.1335	-0.01	0.05	0.817	-0.08	0.09	0.383	0.5
rs57850734	17295131	C	T	0.1335	-0.01	0.05	0.818	-0.08	0.09	0.383	0.5
rs634383	17301257	G	A	0.1325	-0.01	0.05	0.824	-0.08	0.09	0.383	0.5
rs631300	17301980	G	A	0.1325	-0.01	0.05	0.824	-0.08	0.09	0.383	0.5
rs632176	17301779	G	A	0.1325	-0.01	0.05	0.824	-0.08	0.09	0.383	0.5
rs1759462	17305866	A	T	0.1325	-0.01	0.05	0.824	-0.08	0.09	0.383	0.5
rs2780204	17305351	A	G	0.1325	-0.01	0.05	0.824	-0.08	0.09	0.383	0.5
rs1759453	17303383	C	T	0.1325	-0.01	0.05	0.824	-0.08	0.09	0.383	0.5
rs1759459	17306951	C	G	0.1325	-0.01	0.05	0.824	-0.08	0.09	0.383	0.5
rs1759460	17306628	A	T	0.1325	-0.01	0.05	0.824	-0.08	0.09	0.383	0.5
rs1759616	17306633	G	C	0.1325	-0.01	0.05	0.824	-0.08	0.09	0.383	0.5
rs1759617	17306293	G	A	0.1325	-0.01	0.05	0.824	-0.08	0.09	0.383	0.5
rs1759461	17306209	A	G	0.1325	-0.01	0.05	0.824	-0.08	0.09	0.383	0.5
rs1759619	17306140	G	T	0.1325	-0.01	0.05	0.824	-0.08	0.09	0.383	0.5
rs1759618	17306143	T	C	0.1325	-0.01	0.05	0.824	-0.08	0.09	0.383	0.5
rs1759452	17303635	G	A	0.1325	-0.01	0.05	0.825	-0.08	0.09	0.383	0.5
rs10962924	17235434	A	G	0.1325	-0.01	0.05	0.889	-0.08	0.09	0.383	0.5
rs7022444	16523481	A	C	0.009	0	0.29	0.987	-0.48	0.54	0.383	0.43
rs7864296	17176791	G	A	0.1565	0.05	0.05	0.262	-0.07	0.08	0.383	0.2
rs16934816	16568734	T	G	0.0675	0.16	0.11	0.176	0.18	0.2	0.384	0.93
rs2099859	17366964	C	T	0.1315	-0.02	0.05	0.687	-0.08	0.09	0.384	0.56
rs4621917	17318681	G	A	0.1325	-0.02	0.05	0.759	-0.08	0.09	0.384	0.56
rs1759463	17305755	G	C	0.1325	-0.01	0.05	0.78	-0.08	0.09	0.384	0.5
rs600133	17297041	G	A	0.1325	-0.01	0.05	0.819	-0.08	0.09	0.384	0.5
rs1113382	17315670	T	G	0.1335	-0.01	0.05	0.823	-0.08	0.09	0.384	0.5
rs2584546	17405219	A	G	0.126	-0.01	0.05	0.898	-0.08	0.09	0.384	0.5
rs2593390	17404822	G	A	0.126	-0.01	0.05	0.898	-0.08	0.09	0.384	0.5
rs2779761	17181689	G	A	0.2025	0.05	0.04	0.215	-0.07	0.08	0.384	0.18
rs411013	17054337	C	T	0.4975	-0.06	0.03	0.0528	-0.05	0.06	0.385	0.88
rs145612330	16432491	T	A	0.0145	-0.43	0.2	0.0312	-0.33	0.38	0.385	0.82
rs10963013	17295555	C	T	0.1315	-0.02	0.05	0.747	-0.08	0.09	0.385	0.56
rs672799	17293527	C	T	0.1325	-0.01	0.05	0.773	-0.08	0.09	0.385	0.5
rs1759458	17307204	G	A	0.1325	-0.01	0.05	0.78	-0.08	0.09	0.385	0.5
rs1413419	17304101	G	A	0.1315	-0.01	0.05	0.783	-0.08	0.09	0.385	0.5
rs1413418	17304243	A	G	0.1325	-0.01	0.05	0.812	-0.08	0.09	0.385	0.5
rs679666	17298726	T	C	0.1325	-0.01	0.05	0.82	-0.08	0.09	0.385	0.5
rs614471	17296785	T	G	0.1325	-0.01	0.05	0.82	-0.08	0.09	0.385	0.5
rs614412	17296822	T	C	0.1325	-0.01	0.05	0.82	-0.08	0.09	0.385	0.5
rs599626	17297187	C	T	0.1325	-0.01	0.05	0.82	-0.08	0.09	0.385	0.5
rs585682	17297273	T	G	0.1325	-0.01	0.05	0.82	-0.08	0.09	0.385	0.5
rs77796443	17295032	C	T	0.1325	-0.01	0.05	0.82	-0.08	0.09	0.385	0.5
rs76610117	17294974	G	C	0.1325	-0.01	0.05	0.82	-0.08	0.09	0.385	0.5
rs1759626	17294715	G	C	0.1325	-0.01	0.05	0.82	-0.08	0.09	0.385	0.5
rs76062797	17294765	C	G	0.1325	-0.01	0.05	0.82	-0.08	0.09	0.385	0.5
rs643776	17294095	G	A	0.1325	-0.01	0.05	0.82	-0.08	0.09	0.385	0.5
rs647013	17293321	C	G	0.1325	-0.01	0.05	0.82	-0.08	0.09	0.385	0.5
rs7027051	17292083	A	G	0.1325	-0.01	0.05	0.821	-0.08	0.09	0.385	0.5
rs632313	17294312	T	C	0.1325	-0.01	0.05	0.824	-0.08	0.09	0.385	0.5
rs2990666	17290682	G	C	0.1315	-0.01	0.05	0.842	-0.08	0.09	0.385	0.5
rs600041	17297105	T	C	0.1325	-0.01	0.05	0.807	-0.08	0.09	0.386	0.5
rs943742	16551240	C	T	0.396	-0.03	0.04	0.418	0.06	0.07	0.386	0.26
rs2010086	17377414	C	T	0.1315	-0.02	0.05	0.647	-0.08	0.09	0.387	0.56
rs642582	17301105	T	A	0.1315	-0.02	0.05	0.754	-0.08	0.09	0.387	0.56
rs80107744	17295019	C	T	0.1325	-0.01	0.05	0.82	-0.08	0.09	0.387	0.5
rs79827981	16687579	T	C	0.0215	-0.07	0.18	0.714	0.28	0.33	0.387	0.35
rs1927640	16456965	A	G	0.295	-0.05	0.04	0.156	-0.06	0.07	0.388	0.9
rs3891457	17352284	A	C	0.1315	-0.02	0.05	0.699	-0.08	0.09	0.388	0.56
rs12000610	17255346	G	C	0.1335	-0.01	0.05	0.795	-0.08	0.09	0.388	0.5
rs7020918	17255902	A	C	0.1335	-0.01	0.05	0.795	-0.08	0.09	0.388	0.5
rs7037408	17255982	T	C	0.1335	-0.01	0.05	0.796	-0.08	0.09	0.388	0.5
rs10963023	17311722	A	G	0.1335	-0.01	0.05	0.809	-0.08	0.09	0.388	0.5
rs10963024	17311723	T	C	0.1335	-0.01	0.05	0.809	-0.08	0.09	0.388	0.5
rs61399132	17241698	A	AT	0.1345	-0.01	0.05	0.849	-0.08	0.09	0.388	0.5
rs1330299	16760796	T	C	0.3295	0.04	0.04	0.259	-0.06	0.07	0.388	0.21
rs35750919	16920348	GT	G	0.011	0.67	0.19	0.000569	-0.35	0.4	0.388	0.02
rs7862336	17355144	C	T	0.128	-0.02	0.05	0.622	-0.08	0.09	0.389	0.56
rs593552	17282639	T	C	0.1325	-0.01	0.05	0.762	-0.08	0.09	0.389	0.5
rs582134	17282901	T	A	0.1325	-0.01	0.05	0.762	-0.08	0.09	0.389	0.5
rs2990958	17295825	G	A	0.1325	-0.01	0.05	0.764	-0.08	0.09	0.389	0.5
rs673587	17293691	C	T	0.1325	-0.01	0.05	0.764	-0.08	0.09	0.389	0.5
rs2483208	17292485	G	T	0.1325	-0.01	0.05	0.764	-0.08	0.09	0.389	0.5
rs1930643	17311078	C	A	0.1325	-0.01	0.05	0.775	-0.08	0.09	0.389	0.5
9	17255460	T	TTCTTC	0.1335	-0.01	0.05	0.794	-0.08	0.09	0.389	0.5
9	17255462	T	TGATG	0.1335	-0.01	0.05	0.794	-0.08	0.09	0.389	0.5
rs13288412	17256997	A	C	0.1335	-0.01	0.05	0.794	-0.08	0.09	0.389	0.5
rs13289731	17256994	T	C	0.1335	-0.01	0.05	0.794	-0.08	0.09	0.389	0.5
rs3861709	16703100	C	T	0.237	0.06	0.04	0.143	-0.07	0.08	0.389	0.15
rs201984084	16444454	T	TG	0.019	0.23	0.19	0.243	0.29	0.33	0.39	0.87
rs1759457	17307799	C	G	0.1315	-0.02	0.05	0.75	-0.08	0.09	0.39	0.56
rs11299962	17309671	T	TA	0.1315	-0.02	0.05	0.75	-0.08	0.09	0.39	0.56
9	17287035	C	G	0.1325	-0.01	0.05	0.777	-0.08	0.09	0.39	0.5
rs10962582	16772775	C	A	0.3325	0.03	0.03	0.337	-0.05	0.06	0.39	0.23
rs2815182	17153969	G	A	0.17	0.04	0.04	0.344	-0.07	0.08	0.39	0.22
rs10810673	16923184	T	C	0.3935	-0.05	0.03	0.133	-0.05	0.06	0.391	1
rs1927641	16456911	C	T	0.295	-0.05	0.04	0.164	-0.06	0.07	0.391	0.9
rs16934745	16490828	A	T	0.039	0.07	0.13	0.632	0.21	0.24	0.391	0.61
rs10121471	17308882	T	A	0.1315	-0.02	0.05	0.751	-0.08	0.09	0.391	0.56
rs117590713	17148952	T	C	0.0085	0.05	0.21	0.796	-0.29	0.34	0.391	0.39
rs79689834	17278146	C	T	0.0125	-0.57	0.15	0.00031	-0.25	0.29	0.391	0.33
rs143842848	17266771	A	T	0.0125	-0.57	0.15	0.00031	-0.25	0.29	0.391	0.33
rs10810615	16759746	G	C	0.073	0.13	0.08	0.0918	-0.12	0.14	0.391	0.12
rs146275939	16521299	G	A	0.026	0.19	0.18	0.284	0.28	0.33	0.392	0.81
rs6475057	16478688	T	C	0.208	-0.02	0.05	0.613	-0.08	0.09	0.392	0.56
rs10756862	17310512	A	G	0.1315	-0.02	0.05	0.751	-0.08	0.09	0.392	0.56
[truncated: 2,834 more rows]
